# Supplementary material for: Iridium-catalyzed reductive etherification of α,β-unsaturated ketones and aldehydes with alcohols
Source: Royal Society of Chemistry journal article supplement (doi:10.1039/d2ob00122e), 2022-01-01
Supplement: d2ob00122e1.pdf [file d2ob00122e1.pdf]

# Supporting Information

## Iridium-Catalyzed Reductive Etherification of $\alpha$ , $\beta$ -Unsaturated Ketones and Aldehydes with Alcohols

Lu Ouyang, <sup>#</sup> Yanping Xia, <sup>#</sup> Rui Miao, Jianhua Liao and Renshi Luo\*

### Table of Contents

|                                                                       |     |
|-----------------------------------------------------------------------|-----|
| A. General Methods.....                                               | S2  |
| B. Procedure for the Preparation of 3.....                            | S2  |
| C. Procedure for the Preparation of 5.....                            | S2  |
| D. Reductive etherification of 1y.....                                | S3  |
| E. The kinetic isotope study of model reaction and control study..... | S3  |
| F. Analytical Data.....                                               | S8  |
| G. References.....                                                    | S17 |
| H. NMR Spectrum.....                                                  | S18 |
| I. <sup>1</sup> H NMR Spectrum of TC-6-H.....                         | S58 |

## A. General Methods

$^1\text{H}$  and  $^{13}\text{C}$  NMR spectra were recorded by using a Bruker DRX-400 spectrometer (400.0 MHz for  $^1\text{H}$ ; 100.0 MHz for  $^{13}\text{C}$ ), using  $\text{CDCl}_3$  as solvent and TMS as an internal standard. The chemical shifts are referenced to signals at 7.26 and 77.0 ppm, respectively. Chemical shifts ( $\delta$ ) are reported in ppm and quoted to the nearest 0.01 ppm relative to the residual protons in  $\text{CDCl}_3$  (7.26 ppm for  $^1\text{H}$ ) or TMS (0 ppm for  $^1\text{H}$ ) and  $\text{CDCl}_3$  (77.0 ppm for  $^{13}\text{C}$ ). Data are reported as follows: Chemical shift (number of protons, multiplicity, coupling constants). Coupling constants were quoted to the nearest 0.1 Hz and multiplicity reported according to the following convention: s = singlet, d = doublet, t = triplet, q = quartet, m = multiplet, br = broad. GC analyses were performed on a GC-7900 chromatograph with an FID and equipped with an AT.SE-30 capillary column (internal diameter: 0.32 mm, length: 30 m).

## B. Procedure for the Preparation of 3

To a 25.0 mL dried Schlenk tube was added the mixture of  $\alpha$ ,  $\beta$ -unsaturated ketone (0.5 mmol), alcohols (1.0 mL), Ir catalyst (1.0 mol %),  $\text{HCO}_2\text{H}$  (10.0equiv),  $\text{CF}_3\text{CO}_2\text{H}$  (2.0equiv) in water (1.0 mL) successively. The mixture was stirred at 80 °C for 12 h under air. After the reaction was completed, the mixture was diluted with  $\text{H}_2\text{O}$  (15.0 mL), neutralized with  $\text{NaHCO}_3$ , and extracted with EtOAc (10.0 mL  $\times$  3). The organic extract was washed with brine (10.0 mL  $\times$  3) and dried over anhydrous  $\text{MgSO}_4$ . After removal of the EtOAc under vacuum, the crude product was purified by column chromatography on silica gel with hexanes or petroleum ether/ethyl acetate (10:1 to 50:1) to give the desired products.

## C. Procedure for the Preparation of 5

To a 25 mL dried Schlenk tube was added the mixture of substituted chalcone (0.5 mmol), alcohols (1.0 mL), Ir catalyst (1.0 mol %),  $\text{HCO}_2\text{H}$  (10.0equiv),  $\text{CF}_3\text{CO}_2\text{H}$  (2.0equiv) in water (1.0 mL) successively. The mixture was stirred at 80 °C for 12 h under air. After the reaction was completed, the mixture was diluted with  $\text{H}_2\text{O}$  (15.0 mL), neutralized with  $\text{NaHCO}_3$ , and extracted with EtOAc (10.0 mL  $\times$  3). The organic extract was washed with brine (10.0 mL  $\times$  3) and dried over anhydrous  $\text{MgSO}_4$ . After removal of the EtOAc under vacuum, the crude product was purified by column chromatography on silica gel with hexanes or petroleum ether/ethyl acetate

(10:1 to 50:1) to give the desired products (Scheme S1).

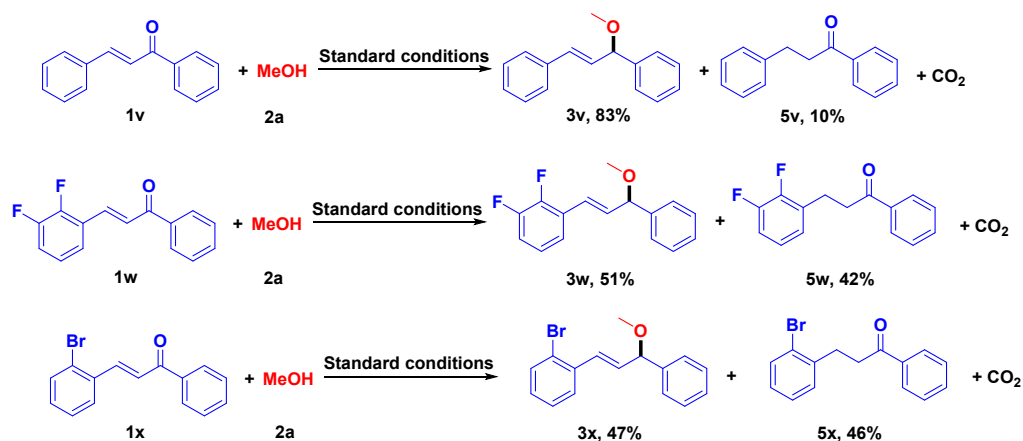

**Scheme S1.** General procedure for the synthesis of **5**.

#### D. Reductive etherification of **1y**

To a 25.0 mL dried Schlenk tube was added the mixture of **1y** (0.5 mmol), alcohols (1 mL), Ir catalyst (1.0 mol %), HCO<sub>2</sub>H (10.0 equiv), CF<sub>3</sub>CO<sub>2</sub>H (2.0 equiv) in water (1.0 mL) successively. The mixture was stirred at 80 °C for 12 h under air. After the reaction was completed, the mixture was diluted with H<sub>2</sub>O (15.0 mL), neutralized with NaHCO<sub>3</sub>, and extracted with EtOAc (10.0 mL × 3). The organic extract was washed with brine (10.0 mL × 3) and dried over anhydrous MgSO<sub>4</sub>. After removal of the EtOAc under vacuum, the crude product was purified by column chromatography on silica gel with hexanes or petroleum ether/ethyl acetate (10:1 to 50:1) to give the desired products (Scheme S2).

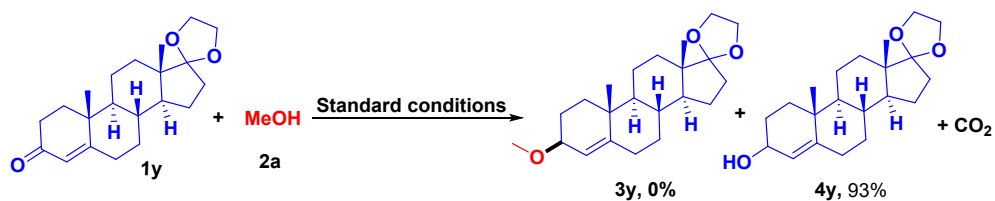

**Scheme S2.** General procedure for the synthesis of **4y**.

#### E. The kinetic isotope study of model reaction and control study

##### (1) control study

Preliminary control experiment was conducted to probe the mechanism of this reductive etherification (Scheme S3). For instance, no etherification product **6a** but reductive product

**7a** was formed when compound 4-phenyl-2-butanone (**5a**) was employed as the substrate under standard conditions.

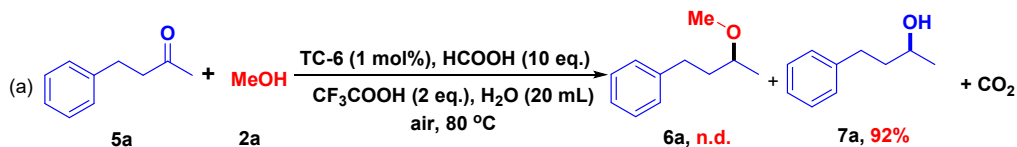

**Scheme S3.** Preliminary control studies.

Besides, the reaction of allylic alcohol **4a** and MeOH as substrates was conducted under standard conditions. Indeed, the desired ether product of **3a** was provided in 95% yield after 4h (Scheme S4b<sub>1</sub>). In fact, the corresponding product of **3a** was also formed even without iridium catalyst and HCO<sub>2</sub>H by employing **4a** as material (Scheme S4b<sub>2</sub>).

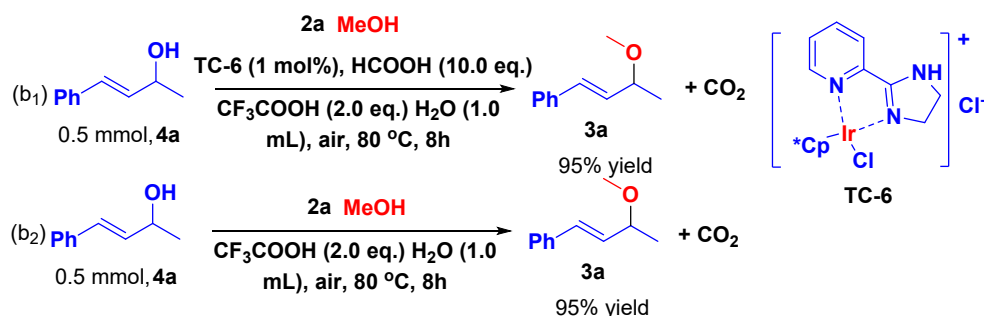

**Scheme S4b.** Allylic alcohol **4a** employed as substrate.

Base on above results, an additional experiment was performed to see whether the allylic alcohol was formed during the etherification and monitored its variation with time with model reaction. As expected, the allylic alcohol **4a** was observed by TLC or GC-MS. For instance, 3.0% of the allylic alcohol product **4a** determined by GC-MS was formed in 1h. The yield of **4a** was increased to 5% after 2 hours, which reached a peak of 6% about 4 hours. Nevertheless, only 1.5% of **4a** was detected after 6 hours, which was disappeared after 8 hours (Scheme S4c).

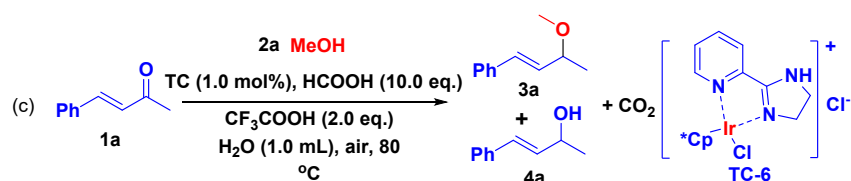

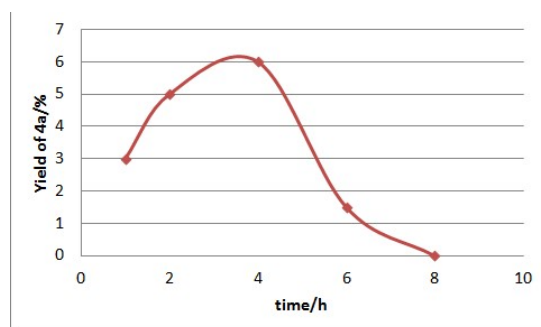

**Scheme S4c.** The yield of **4a** of the model reaction determined by GC-MS.

## (2) The kinetic isotope study of model reaction

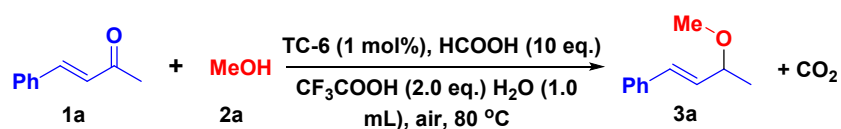

### (a) DCO<sub>2</sub>D as hydrogen donor

62% Deuterated product of **3a** was observed by using DCO<sub>2</sub>D as hydrogen donor (Figure S1a) under standard conditions, which showed formic acid was directly involved in the reductive etherification process.

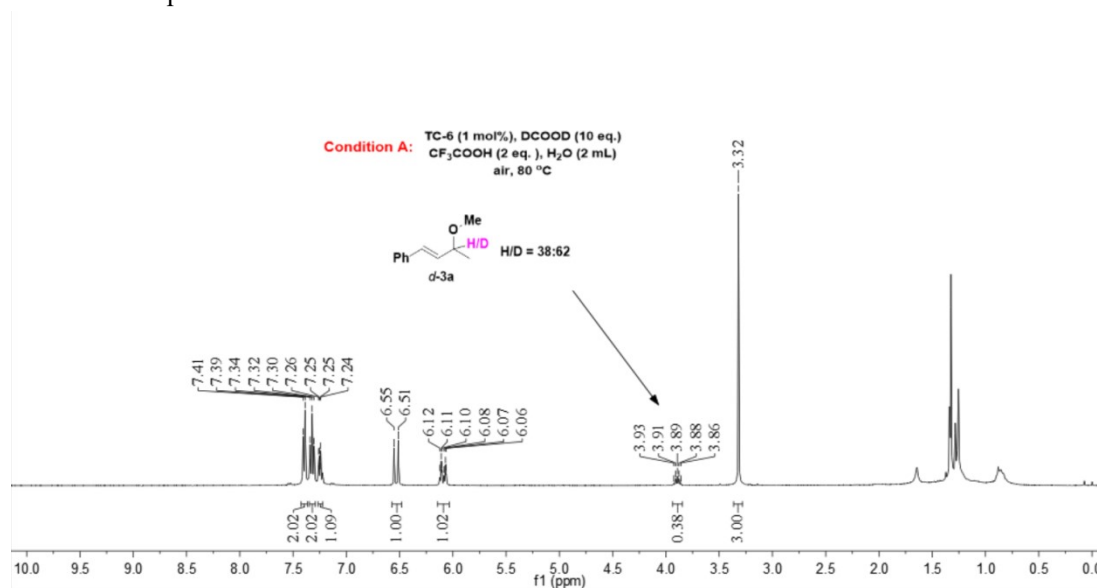

**Figure S1a.** DCO<sub>2</sub>D as hydrogen donor.

### (b) Instead CF<sub>3</sub>CO<sub>2</sub>H with CF<sub>3</sub>CO<sub>2</sub>D

No deuterated product of **3a** was formed instead CF<sub>3</sub>CO<sub>2</sub>H with CF<sub>3</sub>CO<sub>2</sub>D under standard conditions (Figure S1b), which indicated trifluoroacetic acid was only involved in the formation of the allyl carbocation intermediate.

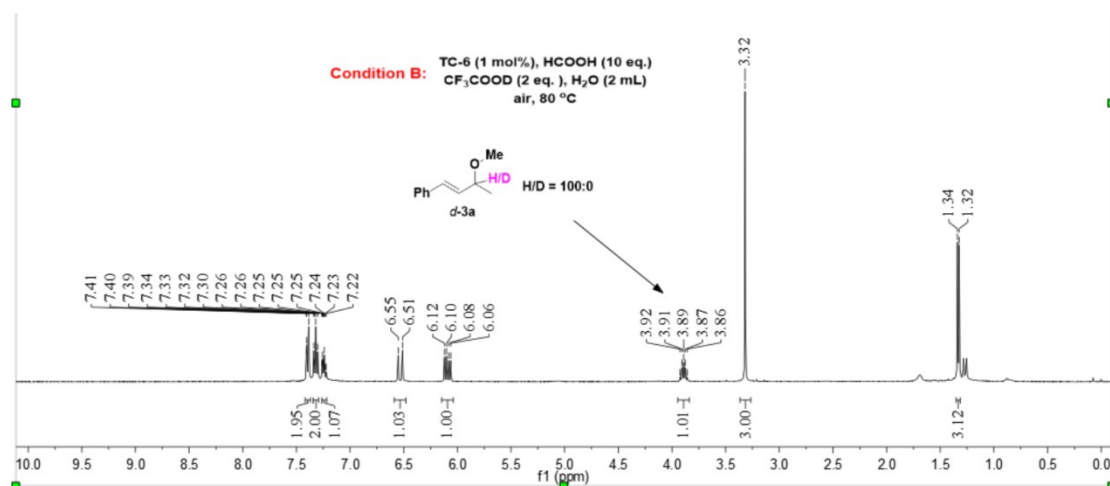

**Figure S1b.** Instead CF<sub>3</sub>CO<sub>2</sub>H with CF<sub>3</sub>CO<sub>2</sub>D.

**(c) D<sub>2</sub>O and DCO<sub>2</sub>D were employed**

Compared with Condition A, more deuterated product of **3a** (up to 82%) was achieved when D<sub>2</sub>O was employed as solvent and DCO<sub>2</sub>D was employed as hydrogen sources (Figure S1c), showing that water was also participated in the reductive etherification transformation.

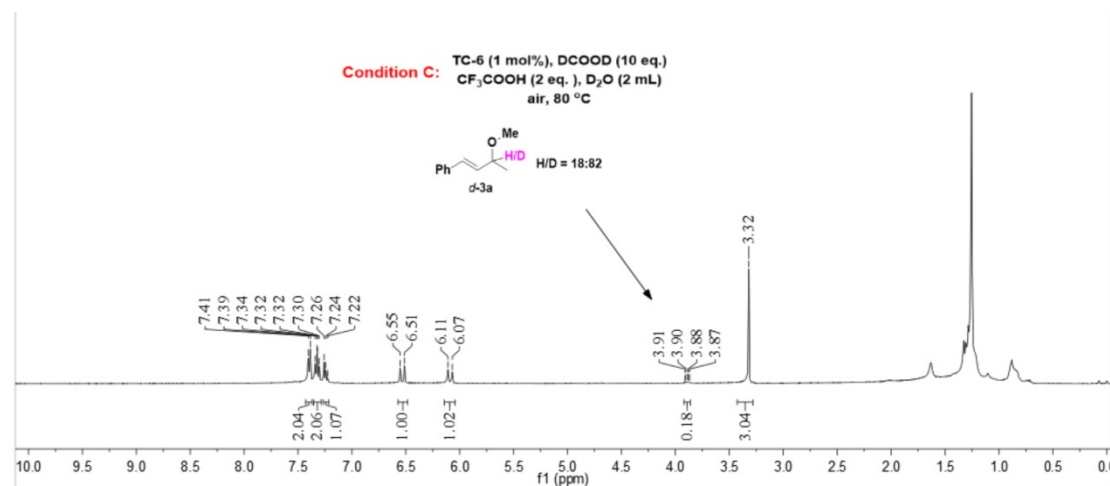

**Figure S1c.** D<sub>2</sub>O and DCO<sub>2</sub>D were employed.

**(d) CF<sub>3</sub>CO<sub>2</sub>D and D<sub>2</sub>O were employed**

Compared with Condition B, deuterated product of **3a** (up to 18%) was achieved when D<sub>2</sub>O was employed as solvent and CF<sub>3</sub>CO<sub>2</sub>D was employed (Figure S1d), showing that water was also participated in the reductive etherification transformation.

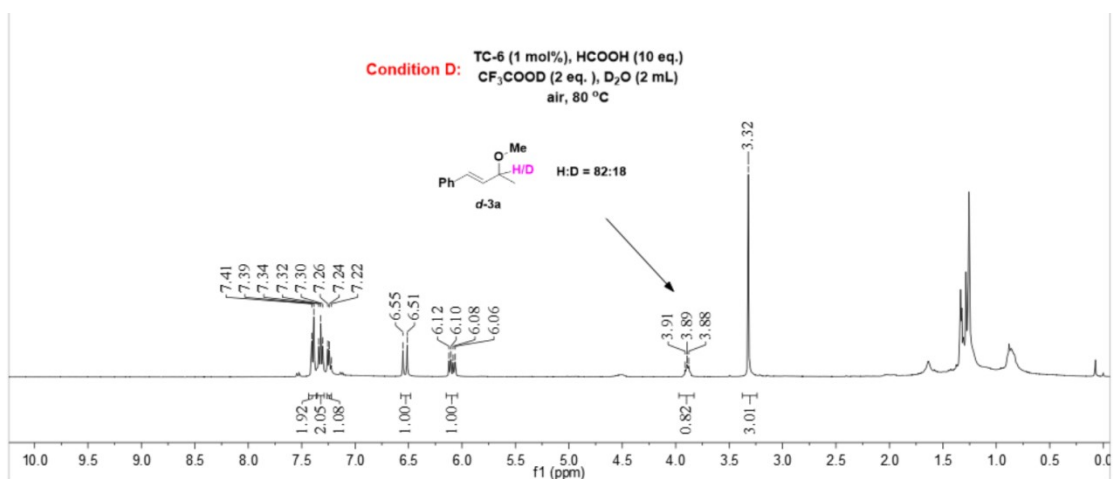

**Figure S1d.** CF<sub>3</sub>CO<sub>2</sub>D and D<sub>2</sub>O were employed.

**(e) CF<sub>3</sub>CO<sub>2</sub>D, D<sub>2</sub>O and DCO<sub>2</sub>D were employed**

13% Non-deuterated **3a** was detected even CF<sub>3</sub>CO<sub>2</sub>D, DCO<sub>2</sub>D and D<sub>2</sub>O were employed (Figure S1e), which indirectly showcased that water, which came from air in this open system, was involved in the reductive etherification process. In this content, the hydrogen or deuterium incorporated product **3a** may be attributed to H-D exchange between [Ir]-H and D<sub>2</sub>O or [Ir]-D and H<sub>2</sub>O.

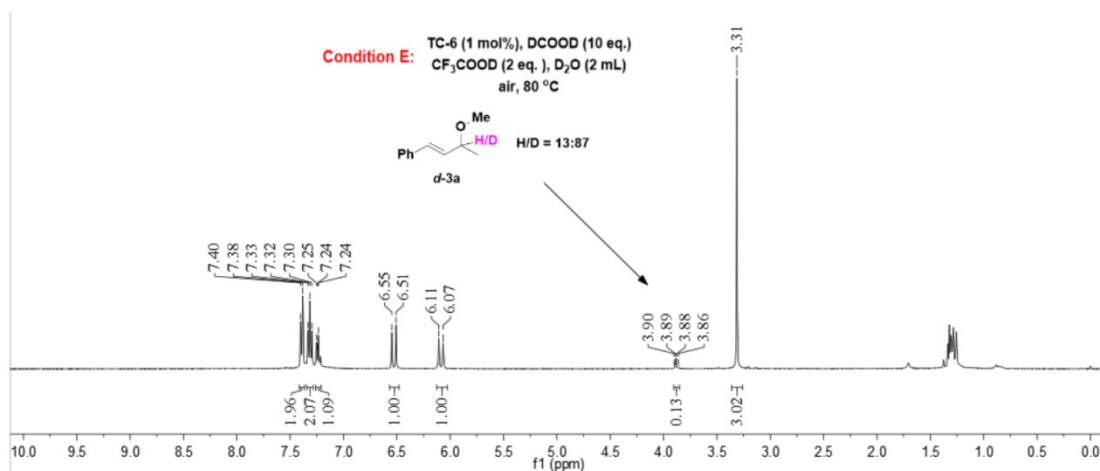

**Figure S1e.** CF<sub>3</sub>CO<sub>2</sub>D, D<sub>2</sub>O and DCO<sub>2</sub>D were employed.

## F. Analytical Data

### (3-methoxybut-1-en-1-yl)benzene (3a):<sup>1</sup>

Yield: 98% (79.5 mg), light yellow oil; <sup>1</sup>H NMR (400 MHz, CDCl<sub>3</sub>) δ 7.38-7.15 (m, 5H), 6.46 (d, *J* = 15.9 Hz, 1H), 6.02 (dd, *J* = 15.9, 7.6 Hz, 1H), 3.98-3.70 (m, 1H), 3.25 (s, 3H), 1.26 (d, *J* = 6.2 Hz, 3H); <sup>13</sup>C NMR (101 MHz, CDCl<sub>3</sub>) δ 136.8, 132.2, 130.8, 128.6, 127.6, 126.5, 76.4, 63.6, 21.8, 15.5.

### (3-ethoxybut-1-en-1-yl)benzene (3b):<sup>2</sup>

Yield: 96% (84.6 mg), light yellow oil; <sup>1</sup>H NMR (400 MHz, CDCl<sub>3</sub>) δ 7.31 (d, *J* = 7.6 Hz, 2H), 7.24 (t, *J* = 7.3 Hz, 2H), 7.18-7.12 (m, 1H), 6.43 (d, *J* = 15.9 Hz, 1H), 6.05 (dd, *J* = 15.9, 7.5 Hz, 1H), 4.02-3.78 (m, 1H), 3.38 (dd, *J* = 15.4, 7.4 Hz, 1H), 3.23 (dd, *J* = 15.2, 7.3 Hz, 1H), 1.53 (dq, *J* = 14.0, 7.0 Hz, 2H), 1.25 (d, *J* = 6.3 Hz, 3H), 0.84 (t, *J* = 7.4 Hz, 3H); <sup>13</sup>C NMR (100 MHz, CDCl<sub>3</sub>) δ 136.8, 132.3, 130.7, 128.6, 127.6, 126.5, 76.5, 70.2, 23.2, 21.7, 10.7.

### (3-propoxybut-1-en-1-yl)benzene (3c):<sup>3</sup>

Yield: 95% (90.4 mg), light yellow oil; <sup>1</sup>H NMR (400 MHz, CDCl<sub>3</sub>) δ 7.40 (d, *J* = 7.2 Hz, 2H), 7.32 (t, *J* = 6.8 Hz, 3H), 6.52 (d, *J* = 15.9 Hz, 1H), 6.13 (dd, *J* = 15.9, 7.4 Hz, 1H), 4.11-3.87 (m, 1H), 3.46 (dd, *J* = 15.0, 7.5 Hz, 1H), 3.32 (dd, *J* = 14.6, 7.6 Hz, 1H), 1.63-1.57 (m, 2H), 1.36-1.32 (m, 3H), 0.93 (t, *J* = 7.4 Hz, 3H). <sup>13</sup>C NMR (100 MHz, CDCl<sub>3</sub>) δ 136.8, 132.3, 130.7, 128.6, 127.6, 126.4, 76.4, 70.2, 23.2, 21.7, 10.7.

### (3-butoxybut-1-en-1-yl)benzene (3d):<sup>3</sup>

Yield: 96% (98 mg), light yellow oil; <sup>1</sup>H NMR (400 MHz, CDCl<sub>3</sub>) δ 7.42 (d, *J* = 7.3 Hz, 2H), 7.35 (t, *J* = 7.1 Hz, 2H), 7.27 (d, *J* = 6.7 Hz, 1H), 6.54 (d, *J* = 15.9 Hz, 1H), 6.15 (dd, *J* = 15.9, 7.4 Hz, 1H), 4.11-3.91 (m, 1H), 3.53 (dd, *J* = 14.6, 7.4 Hz, 1H), 3.38 (dd, *J* = 14.5, 7.2 Hz, 1H), 1.63-1.56 (m, 2H), 1.41 (d, *J* = 7.3 Hz, 2H), 1.36 (d, *J* = 5.9 Hz, 3H), 0.95 (t, *J* = 7.0 Hz, 3H). <sup>13</sup>C NMR (100 MHz, CDCl<sub>3</sub>) δ 136.8, 132.3, 130.7, 128.6, 127.6, 126.5, 76.5, 68.2, 32.1, 21.8, 19.5, 14.0

### (3-(pentyloxy)but-1-en-1-yl)benzene (3e):

Yield: 95% (103.7 mg), light yellow oil; <sup>1</sup>H NMR (400 MHz, CDCl<sub>3</sub>) δ 7.39 (d, *J* = 7.5 Hz, 2H), 7.32 (t, *J* = 7.6 Hz, 2H), 7.24 (d, *J* = 7.5 Hz, 1H), 6.51 (d, *J* = 16.0 Hz, 1H), 6.12 (dd, *J* = 15.9, 7.5 Hz, 1H), 3.98 (p, *J* = 6.5 Hz, 1H), 3.49 (dt, *J* = 9.1, 6.9 Hz, 1H), 3.34 (dt, *J* = 9.1, 6.8 Hz, 1H), 1.58 (dd, *J* = 8.2, 5.7 Hz, 2H), 1.33 (d, *J* = 6.2 Hz, 7H), 0.90 (dd, *J* = 9.4, 4.5 Hz, 3H). <sup>13</sup>C NMR



(100 MHz, CDCl<sub>3</sub>)  $\delta$  136.8, 132.3, 130.7, 128.6, 127.6, 126.5, 76.5, 68.6, 29.7, 28.4, 22.6, 21.7, 14.1. HRMS-ESI (m/z): calcd for C<sub>15</sub>H<sub>23</sub>O, [M+H]: 219.1749, found 219.1750.

**(3-(heptyloxy)but-1-en-1-yl)benzene (3f):**

Yield: 97% (119.5 mg), light yellow oil; <sup>1</sup>H NMR (400 MHz, CDCl<sub>3</sub>)  $\delta$  7.41-7.35 (m, 2H), 7.31 (t, *J* = 7.5 Hz, 2H), 7.24 (d, *J* = 7.1 Hz, 1H), 6.51 (d, *J* = 16.0 Hz, 1H), 6.12 (dd, *J* = 15.9, 7.5 Hz, 1H), 4.03-3.93 (m, 1H), 3.49 (dt, *J* = 9.2, 6.9 Hz, 1H), 3.34 (dt, *J* = 9.2, 6.7 Hz, 1H), 1.61-1.54 (m, 2H), 1.33 (s, 2H), 1.33-1.23 (m, 9H), 0.87 (t, *J* = 6.8 Hz, 3H). <sup>13</sup>C NMR (100 MHz, CDCl<sub>3</sub>)  $\delta$  136.8, 132.3, 130.7, 128.6, 127.6, 126.4, 76.5, 68.6, 31.9, 30.0, 29.2, 26.2, 22.6, 21.7, 14.1. HRMS-ESI (m/z): calcd for C<sub>15</sub>H<sub>27</sub>O, [M+H]: 247.2062, found 247.2060.

**(3-(isopentyloxy)but-1-en-1-yl)benzene (3g) :**

Yield: 94% (102.6 mg), light yellow oil; <sup>1</sup>H NMR (400 MHz, CDCl<sub>3</sub>)  $\delta$  7.42 (d, *J* = 7.2 Hz, 2H), 7.34 (t, *J* = 7.0 Hz, 2H), 7.27 (d, *J* = 7.2 Hz, 1H), 6.54 (d, *J* = 15.9 Hz, 1H), 6.14 (dd, *J* = 15.8, 7.4 Hz, 1H), 4.06-3.96 (m, 1H), 3.55 (dd, *J* = 14.7, 7.3 Hz, 1H), 3.40 (dd, *J* = 14.4, 7.2 Hz, 1H), 1.73 (dt, *J* = 13.0, 6.4 Hz, 1H), 1.50 (dd, *J* = 12.9, 6.3 Hz, 2H), 1.35 (d, *J* = 5.9 Hz, 3H), 0.97-0.89 (m, 6H). <sup>13</sup>C NMR (100 MHz, CDCl<sub>3</sub>)  $\delta$  136.8, 132.3, 130.7, 128.6, 127.5, 126.4, 76.5, 66.8, 38.8, 25.1, 22.8, 22.6, 21.7. HRMS-ESI (m/z): calcd for C<sub>15</sub>H<sub>23</sub>O, [M+H]: 219.1749, found 219.1748.

**(3-(2-ethylbutoxy)but-1-en-1-yl)benzene (3h) :**

Yield: 95% (110.4 mg), light yellow oil; <sup>1</sup>H NMR (400 MHz, CDCl<sub>3</sub>)  $\delta$  7.39 (d, *J* = 7.6 Hz, 2H), 7.32 (t, *J* = 7.5 Hz, 2H), 7.26-7.22 (m, 1H), 6.51 (d, *J* = 16.0 Hz, 1H), 6.12 (dd, *J* = 15.9, 7.4 Hz, 1H), 4.00-3.90 (m, 1H), 3.38 (dd, *J* = 9.3, 6.1 Hz, 1H), 3.23 (dd, *J* = 9.3, 5.7 Hz, 1H), 1.49-1.30 (m, 8H), 0.87 (td, *J* = 7.3, 3.5 Hz, 6H). <sup>13</sup>C NMR (100 MHz, CDCl<sub>3</sub>)  $\delta$  136.9, 132.5, 130.5, 128.6, 127.5, 126.4, 76.6, 71.0, 41.3, 23.4, 23.3, 21.7, 11.2, 11.0. HRMS-ESI (m/z): calcd for C<sub>16</sub>H<sub>25</sub>O, [M+H]: 233.1905, found 233.1909.

**(3-(cyclopropylmethoxy)but-1-en-1-yl)benzene (3i) :**

Yield: 84% (85.0 mg), light yellow oil; <sup>1</sup>H NMR (400 MHz, CDCl<sub>3</sub>)  $\delta$  7.39 (d, *J* = 7.4 Hz, 2H), 7.36 – 7.22 (m, 3H), 6.51 (d, *J* = 16.0 Hz, 1H), 6.12 (dd, *J* = 16.0, 7.5 Hz, 1H), 3.98 (p, *J* = 6.5 Hz, 1H), 3.36 (dd, *J* = 8.8, 7.6 Hz, 1H), 3.22 (dd, *J* = 9.0, 7.2 Hz, 1H), 2.15 (dt, *J* = 14.9, 7.5 Hz, 1H), 1.74 (ddd, *J* = 12.2, 9.4, 6.0 Hz, 3H), 1.55 (dd, *J* = 12.2, 5.2 Hz, 4H), 1.33 (d, *J* = 6.4 Hz, 3H), 1.27 – 1.18 (m, 2H). <sup>13</sup>C NMR (100 MHz, CDCl<sub>3</sub>)  $\delta$  136.7, 132.1, 130.8, 128.6, 127.6, 126.4, 76.2, 73.2, 21.8, 10.9, 3.2, 3.0. HRMS-ESI (m/z): calcd for C<sub>14</sub>H<sub>19</sub>O, [M+H]: 203.1436, found 203.1436.

**(3-(cyclopropylmethoxy)but-1-en-1-yl)benzene (3j) :**

Yield: 83% (89.8 mg), light yellow oil; <sup>1</sup>H NMR (400 MHz, CDCl<sub>3</sub>) δ 7.41 (d, *J* = 6.0 Hz, 2H), 7.34 (s, 2H), 7.27 (d, *J* = 6.3 Hz, 1H), 6.53 (d, *J* = 15.8 Hz, 1H), 6.14 (dd, *J* = 15.3, 5.7 Hz, 1H), 4.00 (s, 1H), 3.50 (t, *J* = 6.7 Hz, 1H), 3.36 (t, *J* = 6.3 Hz, 1H), 2.64-2.50 (m, 1H), 2.15-2.04 (m, 2H), 1.97-1.84 (m, 2H), 1.73 (s, 2H), 1.35 (d, *J* = 1.7 Hz, 3H). <sup>13</sup>C NMR (100 MHz, CDCl<sub>3</sub>) δ 136.8, 132.3, 130.7, 128.6, 127.6, 126.4, 76.5, 73.3, 35.3, 25.3, 21.7, 18.6. HRMS-ESI (*m/z*): calcd for C<sub>15</sub>H<sub>21</sub>O, [M+H]: 217.1592, found 217.1598.

**(3-(cyclopentylmethoxy)but-1-en-1-yl)benzene (3k) :**

Yield: 97% (111.7 mg), light yellow oil; <sup>1</sup>H NMR (400 MHz, CDCl<sub>3</sub>) δ 7.39 (d, *J* = 7.4 Hz, 2H), 7.36-7.22 (m, 3H), 6.51 (d, *J* = 16.0 Hz, 1H), 6.12 (dd, *J* = 16.0, 7.5 Hz, 1H), 3.98 (dd, *J* = 13.3, 6.6 Hz, 1H), 3.36 (dd, *J* = 8.8, 7.6 Hz, 1H), 3.22 (dd, *J* = 9.0, 7.2 Hz, 1H), 2.15 (dt, *J* = 14.9, 7.5 Hz, 1H), 1.74 (ddd, *J* = 12.2, 9.4, 6.0 Hz, 3H), 1.55 (dd, *J* = 12.2, 5.2 Hz, 4H), 1.33 (d, *J* = 6.4 Hz, 3H), 1.27-1.18 (m, 2H). <sup>13</sup>C NMR (100 MHz, CDCl<sub>3</sub>) δ 136.8, 132.4, 130.6, 128.6, 127.6, 126.5, 76.6, 73.2, 39.7, 29.8, 29.7, 25.4, 21.7. HRMS-ESI (*m/z*): calcd for C<sub>16</sub>H<sub>23</sub>O, [M+H]: 231.1749, found 231.1741.

**(3-(cyclohexylmethoxy)but-1-en-1-yl)benzene (3l):**

Yield: 92% (112.4 mg), light yellow oil; <sup>1</sup>H NMR (400 MHz, CDCl<sub>3</sub>) δ 7.41 (d, *J* = 7.3 Hz, 2H), 7.34 (t, *J* = 7.2 Hz, 2H), 7.27 (d, *J* = 8.8 Hz, 1H), 6.53 (d, *J* = 15.9 Hz, 1H), 6.14 (dd, *J* = 15.9, 7.3 Hz, 1H), 4.03-3.93 (m, 1H), 3.33 (dd, *J* = 15.6, 7.5 Hz, 1H), 3.18 (t, *J* = 7.7 Hz, 1H), 1.73 (dd, *J* = 31.2, 17.7 Hz, 6H), 1.34 (d, *J* = 6.2 Hz, 3H), 1.30-1.20 (m, 3H), 0.93 (dd, *J* = 24.0, 11.9 Hz, 2H). <sup>13</sup>C NMR (100 MHz, CDCl<sub>3</sub>) δ 136.9, 132.4, 130.5, 128.6, 127.5, 126.4, 76.5, 74.4, 38.3, 30.3, 30.3, 26.7, 25.9, 25.9, 21.7. HRMS-ESI (*m/z*): calcd for C<sub>17</sub>H<sub>25</sub>O, [M+H]: 245.1905, found 245.1907.

**(3-(2-cyclopropylethoxy)but-1-en-1-yl)benzene (3m):**

Yield: 81% (87.6 mg), light yellow oil; <sup>1</sup>H NMR (400 MHz, CDCl<sub>3</sub>) δ 7.42 (d, *J* = 7.2 Hz, 2H), 7.34 (t, *J* = 6.9 Hz, 2H), 7.26 (s, 1H), 6.55 (d, *J* = 15.9 Hz, 1H), 6.15 (dd, *J* = 15.7, 7.3 Hz, 1H), 4.14 – 3.94 (m, 1H), 3.60 (dd, *J* = 15.4, 7.7 Hz, 1H), 3.45 (dd, *J* = 14.9, 7.5 Hz, 1H), 1.55 – 1.47 (m, 2H), 1.36 (d, *J* = 4.5 Hz, 3H), 0.81 – 0.71 (m, 1H), 0.44 (d, *J* = 6.6 Hz, 2H), 0.08 (d, *J* = 8.0 Hz, 2H). 0.08 (d, *J* = 8.0 Hz, 2H). <sup>13</sup>C NMR (100 MHz, CDCl<sub>3</sub>) δ 136.8, 132.3, 130.7, 128.6,

127.6, 126.4, 76.5, 68.5, 35.1, 21.7, 7.9, 4.2, 4.2. HRMS-ESI (m/z): calcd for C<sub>15</sub>H<sub>21</sub>O, [M+H]: 217.1592, found 217.1586.

**(3-(2-cyclohexylethoxy)but-1-en-1-yl)benzene (3n):**<sup>4</sup>

Yield: 94% (121.5 mg), light yellow oil; <sup>1</sup>H NMR (400 MHz, CDCl<sub>3</sub>) δ 7.39 (s, 2H), 7.32 (d, *J* = 5.5 Hz, 2H), 7.25 (s, 1H), 6.51 (d, *J* = 15.8 Hz, 1H), 6.21-6.00 (m, 1H), 3.98 (d, *J* = 5.0 Hz, 1H), 3.53 (d, *J* = 6.3 Hz, 1H), 3.44-3.30 (m, 1H), 1.65 (d, *J* = 28.1 Hz, 6H), 1.48 (s, 2H), 1.33 (s, 3H), 1.27-1.14 (m, 3H), 0.90 (s, 2H). <sup>13</sup>C NMR (100 MHz, CDCl<sub>3</sub>) δ 136.8, 132.3, 130.7, 128.6, 127.6, 126.4, 76.5, 66.4, 37.4, 34.6, 33.5, 33.3, 26.6, 26.3, 21.8.

**1-fluoro-4-(3-methoxybut-1-en-1-yl)benzene (3o) :**

Yield: 71% (64.0 mg), light yellow oil; <sup>1</sup>H NMR (400 MHz, CDCl<sub>3</sub>) δ 7.50 – 7.27 (m, 2H), 7.00 (t, *J* = 8.1 Hz, 2H), 6.49 (d, *J* = 15.9 Hz, 1H), 6.01 (dd, *J* = 15.9, 7.5 Hz, 1H), 4.07 – 3.71 (m, 1H), 3.32 (s, 3H), 1.32 (d, *J* = 6.2 Hz, 3H); <sup>13</sup>C NMR (100 MHz, CDCl<sub>3</sub>) δ 162.3 (d, *J* = 254 Hz), 132.8 (d, *J* = 3 Hz), 131.2 (d, *J* = 2 Hz), 130.2, 128.0 (d, *J* = 8 Hz), 115.5 (d, *J* = 22 Hz), 78.0, 56.1, 21.4. HRMS-ESI (m/z): calcd for C<sub>11</sub>H<sub>14</sub>FO, [M+H]: 181.1029, found 181.1024.

**1-bromo-4-(3-methoxybut-1-en-1-yl)benzene (3p):**<sup>3</sup>

Yield: 89% (107.3 mg), light yellow oil; <sup>1</sup>H NMR (400 MHz, CDCl<sub>3</sub>) δ 7.46 (d, *J* = 7.7 Hz, 2H), 7.27 (d, *J* = 7.9 Hz, 2H), 6.49 (d, *J* = 15.9 Hz, 1H), 6.11 (dd, *J* = 15.9, 7.2 Hz, 1H), 3.97-3.84 (m, 1H), 3.34 (s, 3H), 1.34 (d, *J* = 6.4 Hz, 3H). <sup>13</sup>C NMR (100 MHz, CDCl<sub>3</sub>) δ 135.6, 132.3, 131.7, 130.1, 128.0, 121.4, 77.9, 56.2, 21.3.

**1-chloro-2-(3-methoxybut-1-en-1-yl)benzene (3q):**<sup>3</sup>

Yield: 76% (74.7 mg), light yellow oil; <sup>1</sup>H NMR (400 MHz, CDCl<sub>3</sub>) δ 7.55 (d, *J* = 7.1 Hz, 1H), 7.35 (d, *J* = 7.3 Hz, 1H), 7.29 – 7.12 (m, 2H), 6.93 (d, *J* = 15.9 Hz, 1H), 6.07 (dd, *J* = 15.9, 7.6 Hz, 1H), 3.94 (dt, *J* = 12.9, 6.3 Hz, 1H), 3.34 (s, 3H), 1.35 (d, *J* = 6.3 Hz, 3H); <sup>13</sup>C NMR (100 MHz, CDCl<sub>3</sub>) δ 134.8, 134.3, 133.1, 129.7, 128.7, 127.6, 126.9, 126.9, 78.0, 56.2, 21.4.

**1-(3-methoxybut-1-en-1-yl)-2,3-dimethylbenzene (3r):**

Yield: 78% (74.2 mg), light yellow oil; <sup>1</sup>H NMR (400 MHz, CDCl<sub>3</sub>) δ 7.29 (s, 1H), 7.08 (s, 2H), 6.82 (d, *J* = 15.7 Hz, 1H), 5.90 (dd, *J* = 15.7, 7.6 Hz, 1H), 3.96 – 3.87 (m, 1H), 3.34 (s, 3H), 2.30 (s, 3H), 2.26 (s, 3H), 1.34 (d, *J* = 5.9 Hz, 3H); <sup>13</sup>C NMR (100 MHz, CDCl<sub>3</sub>) δ 136.8, 136.3, 134.0, 133.2, 130.3, 129.2, 125.6, 124.2, 78.3, 56.0, 21.6, 20.6, 15.4. HRMS-ESI (m/z): calcd for C<sub>13</sub>H<sub>19</sub>O, [M+H]: 191.1436, found 191.1435.

**2,4-difluoro-1-(3-methoxybut-1-en-1-yl)benzene (3s):**

Yield: 60% (59.5 mg), light yellow oil; <sup>1</sup>H NMR (400 MHz, CDCl<sub>3</sub>) δ 7.52 – 7.39 (m, 1H), 6.93 – 6.75 (m, 2H), 6.64 (d, *J* = 16.1 Hz, 1H), 6.12 (dd, *J* = 16.1, 7.4 Hz, 1H), 4.04 – 3.80 (m, 1H), 3.34 (s, 3H), 1.35 (d, *J* = 6.1 Hz, 3H). <sup>13</sup>C NMR (100 MHz, CDCl<sub>3</sub>) δ 162.2 (dd, *J* = 12, 248 Hz), 160.2 (dd, *J* = 12, 251 Hz), 133.7, 128.2 (dd, *J* = 6, 9 Hz), 122.7, 120.8 (d, *J* = 13 Hz), 111.4 (dd, *J* = 4, 12 Hz), 104.0 (t, *J* = 26 Hz), 78.2, 56.2, 21.4. HRMS-ESI (*m/z*): calcd for C<sub>11</sub>H<sub>13</sub>F<sub>2</sub>O, [M+H]: 199.0934, found 199.0944.

**2-(3-methoxybut-1-en-1-yl)-1,4-dimethylbenzene (3t):**

Yield: 80% (76.1 mg), light yellow oil; <sup>1</sup>H NMR (400 MHz, CDCl<sub>3</sub>) δ 7.29 (d, *J* = 10.9 Hz, 1H), 7.03 (dd, *J* = 24.0, 7.4 Hz, 2H), 6.74 (d, *J* = 15.8 Hz, 1H), 5.98 (dd, *J* = 15.7, 7.6 Hz, 1H), 4.00–3.85 (m, 1H), 3.36 (s, 3H), 2.34 (s, 6H), 1.37 (d, *J* = 5.2 Hz, 3H). <sup>13</sup>C NMR (100 MHz, CDCl<sub>3</sub>) δ 135.5, 135.5, 132.5, 132.4, 130.2, 129.4, 128.3, 126.4, 78.4, 56.0, 21.7, 21.0, 19.4. HRMS-ESI (*m/z*): calcd for C<sub>13</sub>H<sub>19</sub>O, [M+H]: 191.1436, found 191.1435.

**(3-methoxyhex-1-en-1-yl)benzene (3u):<sup>5</sup>**

Yield: 83% (39.4 mg), yellow oil; <sup>1</sup>H NMR (400 MHz, CDCl<sub>3</sub>) δ 7.40 (d, *J* = 7.5 Hz, 2H), 7.32 (t, *J* = 7.5 Hz, 2H), 7.28–7.23 (m, 1H), 6.52 (d, *J* = 16.0 Hz, 1H), 6.04 (dd, *J* = 16.0, 8.0 Hz, 1H), 3.69 (dd, *J* = 14.2, 6.7 Hz, 1H), 3.31 (s, 3H), 1.69–1.65 (m, 1H), 1.56–1.50 (m, 1H), 1.40 (dt, *J* = 9.0, 6.9 Hz, 2H), 0.93 (t, *J* = 7.3 Hz, 3H). <sup>13</sup>C NMR (100 MHz, CDCl<sub>3</sub>) δ 136.7, 132.2, 130.5, 128.6, 127.7, 126.5, 82.4, 56.3, 37.9, 18.7, 14.1.

**(3-methoxyprop-1-ene-1,3-diyl)dibenzene (3v):<sup>6</sup>**

Yield: 83% (93.1 mg), light yellow oil; <sup>1</sup>H NMR (400 MHz, CDCl<sub>3</sub>) δ 7.41 (s, 7H), 7.32 (s, 3H), 6.66 (d, *J* = 15.9 Hz, 1H), 6.31 (dd, *J* = 15.9, 6.9 Hz, 1H), 4.83 (d, *J* = 6.7 Hz, 1H), 3.41 (s, 3H). <sup>13</sup>C NMR (100 MHz, CDCl<sub>3</sub>) δ 141.0, 136.6, 131.5, 130.1, 128.6, 127.8, 126.9, 126.6, 84.3, 56.5.

**2,6-difluoro-3-(3-methoxy-3-phenylprop-1-en-1-yl)benzene (3w):**

Yield: 51% (61.8 mg), light yellow oil; <sup>1</sup>H NMR (400 MHz, CDCl<sub>3</sub>) δ 7.38 (s, 4H), 7.31 (d, *J* = 3.4 Hz, 1H), 7.12 (s, 1H), 7.03–6.93 (m, 1H), 6.88 (s, 1H), 6.76 (d, *J* = 16.0 Hz, 1H), 6.35 (dd, *J* = 16.0, 6.4 Hz, 1H), 4.81 (d, *J* = 6.4 Hz, 1H), 3.38 (s, 3H). <sup>13</sup>C NMR (100 MHz, CDCl<sub>3</sub>) δ 157.3 (t, *J* = 243 Hz), 140.5, 133.9 (d, *J* = 4 Hz), 128.7, 127.9, 126.9, 122.6, 116.7 (dd, *J* = 9, 24 Hz), 115.3 (dd, *J* = 8, 24 Hz), 113.3 (dd, *J* = 3, 24 Hz), 84.1, 56.6. HRMS-ESI (*m/z*): calcd for C<sub>16</sub>H<sub>15</sub>F<sub>2</sub>O, [M+H]: 261.1091, found 261.1092.

**1-bromo-2-(3-methoxy-3-phenylprop-1-en-1-yl)benzene (3x):**

Yield: 47% (71.3 mg), light yellow oil; <sup>1</sup>H NMR (400 MHz, CDCl<sub>3</sub>) δ 7.54 (d, *J* = 7.5 Hz, 1H), 7.50 (d, *J* = 7.7 Hz, 1H), 7.43-7.35 (m, 4H), 7.31 (d, *J* = 5.2 Hz, 1H), 7.23 (d, *J* = 7.2 Hz, 1H), 7.09 (t, *J* = 7.4 Hz, 1H), 7.00 (d, *J* = 15.8 Hz, 1H), 6.22 (dd, *J* = 15.6, 6.3 Hz, 1H), 4.85 (d, *J* = 6.6 Hz, 1H), 3.41 (s, 3H). <sup>13</sup>C NMR (100 MHz, CDCl<sub>3</sub>) δ 140.8, 136.5, 133.0, 132.9, 130.3, 129.00, 128.6, 127.8, 127.4, 127.2, 126.9, 123.8, 84.1, 56.6. HRMS-ESI (*m/z*): calcd for C<sub>16</sub>H<sub>17</sub>BrO, [M+H]: 303.0385, found 303.0376.

**(3-methoxyprop-1-en-1-yl)benzene (3aa):**<sup>8</sup>

Yield: 78% (57.8 mg), colorless oil; <sup>1</sup>H NMR (400 MHz, CDCl<sub>3</sub>) δ 7.23 (ddd, *J* = 30.4, 20.5, 7.3 Hz, 5H), 6.52 (t, *J* = 14.0 Hz, 1H), 6.28 – 6.05 (m, 1H), 4.05 – 3.78 (m, 2H), 3.47 – 3.03 (m, 3H). <sup>13</sup>C NMR (100 MHz, CDCl<sub>3</sub>) δ 136.8, 132.5, 128.6, 127.7, 126.5, 126.0, 73.1, 58.0.

**(3-ethoxyprop-1-en-1-yl)benzene(3ab):**<sup>8</sup>

Yield: 63% (51.1 mg), colorless oil; <sup>1</sup>H NMR (400 MHz, CDCl<sub>3</sub>) δ 7.38 (d, *J* = 7.4 Hz, 2H), 7.30 (t, *J* = 7.5 Hz, 2H), 7.24 (d, *J* = 7.3 Hz, 1H), 6.60 (d, *J* = 15.9 Hz, 1H), 6.30 (dt, *J* = 15.9, 6.0 Hz, 1H), 4.14 (d, *J* = 5.7 Hz, 2H), 3.55 (q, *J* = 7.0 Hz, 2H), 1.25 (t, *J* = 7.0 Hz, 3H). <sup>13</sup>C NMR (100 MHz, CDCl<sub>3</sub>) δ 136.8, 132.2, 128.6, 127.6, 126.5, 126.4, 71.3, 65.7, 15.3.

**(3-butoxyprop-1-en-1-yl)benzene(3ac):**<sup>9</sup>

Yield: 56% (53.3 mg), colorless oil; <sup>1</sup>H NMR (400 MHz, CDCl<sub>3</sub>) δ 7.38 (d, *J* = 7.6 Hz, 2H), 7.30 (t, *J* = 7.5 Hz, 2H), 7.23 (d, *J* = 7.0 Hz, 1H), 6.60 (d, *J* = 15.9 Hz, 1H), 6.30 (dt, *J* = 15.8, 5.9 Hz, 1H), 4.13 (d, *J* = 5.9 Hz, 2H), 3.48 (t, *J* = 6.6 Hz, 2H), 1.65 – 1.55 (m, 2H), 1.40 (dd, *J* = 14.9, 7.4 Hz, 2H), 0.93 (t, *J* = 7.3 Hz, 3H). <sup>13</sup>C NMR (100 MHz, CDCl<sub>3</sub>) δ 136.8, 132.1, 128.6, 127.6, 126.5, 71.4, 70.3, 31.9, 19.4, 14.0.

**(3-(pentyloxy)prop-1-en-1-yl)benzene(3ad):**<sup>10</sup>

Yield: 47% (48.0 mg), colorless oil; <sup>1</sup>H NMR (400 MHz, CDCl<sub>3</sub>) δ 7.39 (d, *J* = 7.5 Hz, 2H), 7.31 (t, *J* = 7.3 Hz, 2H), 7.24 (d, *J* = 7.7 Hz, 1H), 6.60 (d, *J* = 15.9 Hz, 1H), 6.30 (dt, *J* = 15.7, 5.9 Hz, 1H), 4.13 (d, *J* = 5.9 Hz, 2H), 3.47 (t, *J* = 6.6 Hz, 2H), 1.66 – 1.57 (m, 2H), 1.35 (s, 4H), 0.91 (d, *J* = 6.4 Hz, 3H). <sup>13</sup>C NMR (100 MHz, CDCl<sub>3</sub>) δ 136.8, 132.1, 128.5, 127.6, 126.5, 71.4, 70.6, 29.5, 28.4, 22.6, 14.1.

**1-(3-methoxyprop-1-en-1-yl)-4-methylbenzene(3ae):**<sup>10</sup>

Yield: 48% (38.9 mg), colorless oil; <sup>1</sup>H NMR (400 MHz, CDCl<sub>3</sub>) δ 7.27 (t, *J* = 8.5 Hz, 2H), 7.12

(d,  $J = 7.4$  Hz, 2H), 6.57 (d,  $J = 15.9$  Hz, 1H), 6.29-6.16 (m, 1H), 4.08 (d,  $J = 5.9$  Hz, 2H), 3.38 (s, 3H), 2.33 (s, 3H).  $^{13}\text{C}$  NMR (100 MHz,  $\text{CDCl}_3$ )  $\delta$  137.5, 133.9, 132.5, 129.3, 126.4, 124.9, 73.2, 57.9, 21.2.

**1-fluoro-4-(3-methoxyprop-1-en-1-yl)benzene(3af):**

Yield: 54% (44.9 mg), colorless oil;  $^1\text{H}$  NMR (400 MHz,  $\text{CDCl}_3$ )  $\delta$  7.42-7.28 (m, 2H), 7.00 (t,  $J = 8.4$  Hz, 2H), 6.57 (d,  $J = 15.9$  Hz, 1H), 6.20 (dt,  $J = 15.8, 5.9$  Hz, 1H), 4.07 (d,  $J = 5.9$  Hz, 2H), 3.39 (s, 3H).  $^{13}\text{C}$  NMR (100 MHz,  $\text{CDCl}_3$ )  $\delta$  162.8 (d,  $J = 245$  Hz), 132.9 (d,  $J = 3$  Hz), 131.3, 128.0 (d,  $J = 8$  Hz), 125.7 (d,  $J = 2$  Hz), 115.5 (d,  $J = 22$  Hz), 73.0, 58.1. HRMS-ESI (m/z): calcd for  $\text{C}_{10}\text{H}_{12}\text{OF}$ , [M+H]: 167.0872, found 167.0876.

**(3-methoxy-2-methylprop-1-en-1-yl)benzene(3ag):<sup>11</sup>**

Yield: 38% (30.8 mg), colorless oil;  $^1\text{H}$  NMR (400 MHz,  $\text{CDCl}_3$ )  $\delta$  7.39-7.17 (m, 5H), 6.50 (s, 1H), 3.98 (s, 2H), 3.37 (s, 3H), 1.89 (s, 3H).  $^{13}\text{C}$  NMR (100 MHz,  $\text{CDCl}_3$ )  $\delta$  137.6, 135.1, 128.9, 128.1, 126.9, 126.5, 78.7, 57.8, 15.4.

**(3-(2-methylbutoxy)prop-1-en-1-yl)benzene(3ah):**

Yield: 42% (42.9 mg), colorless oil;  $^1\text{H}$  NMR (400 MHz,  $\text{CDCl}_3$ )  $\delta$  7.39 (d,  $J = 7.7$  Hz, 2H), 7.31 (t,  $J = 7.5$  Hz, 2H), 7.24 (d,  $J = 7.9$  Hz, 1H), 6.60 (d,  $J = 15.9$  Hz, 1H), 6.30 (dt,  $J = 15.8, 5.9$  Hz, 1H), 4.13 (d,  $J = 5.9$  Hz, 2H), 3.34 (dd,  $J = 8.8, 6.4$  Hz, 1H), 3.29-3.22 (m, 1H), 1.68 (dd,  $J = 13.0, 6.5$  Hz, 1H), 1.53-1.44 (m, 1H), 1.20-1.11 (m, 1H), 0.92 (dd,  $J = 6.7, 4.6$  Hz, 6H).  $^{13}\text{C}$  NMR (100 MHz,  $\text{CDCl}_3$ )  $\delta$  136.9, 131.9, 128.5, 127.6, 126.7, 126.5, 75.8, 71.6, 35.1, 26.3, 16.7, 11.4. HRMS-ESI (m/z): calcd for  $\text{C}_{14}\text{H}_{21}\text{O}$ , [M+H]: 205.1592, found 205.1591.

**2-(3-methoxybut-1-en-1-yl)naphthalene(3ai):**

Yield: 83% (42.9 mg), colorless oil;  $^1\text{H}$  NMR (400 MHz,  $\text{CDCl}_3$ )  $\delta$  7.75-7.60 (m, 4H), 7.52 (d,  $J = 8.5$  Hz, 1H), 7.41-7.30 (m, 2H), 6.61 (d,  $J = 15.9$  Hz, 1H), 6.13 (dd,  $J = 15.9, 7.5$  Hz, 1H), 3.93-3.78 (m, 1H), 3.27 (s, 3H), 1.29 (d,  $J = 6.2$  Hz, 3H).  $^{13}\text{C}$  NMR (100 MHz,  $\text{CDCl}_3$ )  $\delta$  134.2, 133.6, 133.1, 131.9, 131.5, 128.3, 128.0, 127.7, 126.5, 126.3, 125.9, 123.6, 78.2, 56.2, 21.5. HRMS-ESI (m/z): calcd for  $\text{C}_{15}\text{H}_{17}\text{O}$ , [M+H]: 213.1279, found 213.1279.

**(E)-(3-isopropoxyprop-1-en-1-yl)benzene (3aj):<sup>12</sup>**

Yield: 54% (23.8 mg), colorless oil;  $^1\text{H}$  NMR (400 MHz,  $\text{CDCl}_3$ )  $\delta$  7.38 (d,  $J = 7.6$  Hz, 2H), 7.30 (t,  $J = 7.5$  Hz, 2H), 7.26 – 7.21 (m, 1H), 6.60 (d,  $J = 15.9$  Hz, 1H), 6.30 (dt,  $J = 15.9, 6.0$  Hz, 1H), 4.18 –

4.10 (m, 2H), 3.69 (dt,  $J = 12.2, 6.1$  Hz, 1H), 1.21 (d,  $J = 6.1$  Hz, 6H).  $^{13}\text{C}$  NMR (100 MHz,  $\text{CDCl}_3$ )  $\delta$  136.91, 131.76, 128.51, 127.52, 126.91, 126.47, 70.97, 68.73, 22.17.

**(E)-4-phenylbut-3-en-2-ol (4a):**<sup>7</sup>

Light yellow oil;  $^1\text{H}$  NMR (400 MHz,  $\text{CDCl}_3$ )  $\delta$  7.36 (d,  $J = 7.7$  Hz, 2H), 7.30 (t,  $J = 7.3$  Hz, 2H), 7.23 (d,  $J = 6.9$  Hz, 1H), 6.55 (d,  $J = 15.9$  Hz, 1H), 6.25 (dd,  $J = 15.9, 6.3$  Hz, 1H), 4.52-4.41 (m, 1H), 1.36 (d,  $J = 6.3$  Hz, 3H).  $^{13}\text{C}$  NMR (100 MHz,  $\text{CDCl}_3$ )  $\delta$  136.7, 133.6, 129.4, 128.6, 128.4, 127.7, 126.5, 68.9, 23.4.

**(8S,9S,10R,13S,14S)-10,13-dimethyl-2,3,6,7,8,9,10,11,12,13,14,15,16,17-tetradecahydro-1H-cyclopenta[a]phenanthren-3-ol (4y):**

Yield: 93%, (127.4 mg), Light yellow oil;  $^1\text{H}$  NMR (400 MHz,  $\text{CDCl}_3$ )  $\delta$  5.28 (s, 1H), 4.19-4.10 (m, 1H), 3.93-3.83 (m, 4H), 2.24-2.13 (m, 1H), 2.06-1.94 (m, 3H), 1.81-1.67 (m, 4H), 1.52 (dd,  $J = 18.8, 7.0$  Hz, 4H), 1.47-1.35 (m, 5H), 1.30-1.23 (m, 3H), 1.05 (s, 3H), 0.86 (s, 3H).  $^{13}\text{C}$  NMR (100 MHz,  $\text{CDCl}_3$ )  $\delta$  147.4, 123.5, 119.4, 67.9, 65.2, 64.5, 54.2, 50.0, 45.8, 37.4, 36.2, 35.4, 34.1, 32.4, 32.1, 30.6, 29.5, 22.7, 20.5, 19.0, 14.3. HR MS-ESI (m/z): calcd for  $\text{C}_{21}\text{H}_{33}\text{O}_3$ , [M+H]: 333.2430, found 333.2428.

**1,3-diphenylpropan-1-one (5v):**<sup>13</sup>

Yield: 10% (5.3 mg), yellow oil;  $^1\text{H}$  NMR (400 MHz,  $\text{CDCl}_3$ )  $\delta$  8.00 (d,  $J = 7.8$  Hz, 2H), 7.59 (t,  $J = 7.3$  Hz, 1H), 7.49 (t,  $J = 7.7$  Hz, 2H), 7.36-7.22 (m, 5H), 3.37-3.30 (m, 2H), 3.14-3.07 (m, 2H).  $^{13}\text{C}$  NMR (100 MHz,  $\text{CDCl}_3$ )  $\delta$  199.3, 141.3, 136.9, 133.1, 128.6, 128.6, 128.5, 128.1, 126.2, 40.5, 30.2.

**3-(2,6-difluorophenyl)-1-phenylpropan-1-one (5w):**

Yield: 42% (47.9 mg), light yellow oil;  $^1\text{H}$  NMR (400 MHz,  $\text{CDCl}_3$ )  $\delta$  7.96 (dd,  $J = 5.2, 3.3$  Hz, 2H), 7.60-7.53 (m, 1H), 7.50-7.42 (m, 2H), 7.02-6.93 (m, 2H), 6.91-6.82 (m, 1H), 3.30 (dd,  $J = 9.7, 5.3$  Hz, 2H), 3.07 (t,  $J = 7.5$  Hz, 2H).  $^{13}\text{C}$  NMR (100 MHz,  $\text{CDCl}_3$ )  $\delta$  198.6, 159.8, 159.8, 158.4, 158.4, 157.4, 156.0, 136.6, 133.3, 129.9, 129.8, 129.7, 129.6, 128.7, 128.0, 117.4, 117.3, 117.2, 117.1, 116.4, 116.3, 116.1, 116.0, 114.3, 114.2, 114.1, 114.0, 38.4, 23.8. HRMS-ESI (m/z): calcd for  $\text{C}_{15}\text{H}_{13}\text{F}_2\text{O}$ , [M+H]: 247.0934, found 247.0937.

**3-(2-bromophenyl)-1-phenylpropan-1-one (5x):**<sup>14</sup>

Yield: 46% (66.5 mg), light yellow oil;  $^1\text{H}$  NMR (400 MHz,  $\text{CDCl}_3$ )  $\delta$  7.98 (d,  $J = 7.6$  Hz, 2H), 7.56 (t,  $J = 7.5$  Hz, 2H), 7.45 (t,  $J = 7.7$  Hz, 2H), 7.32 (dd,  $J = 7.6, 1.5$  Hz, 1H), 7.25 (d,  $J = 7.0$  Hz,

1H), 7.08 (td,  $J = 7.7, 1.6$  Hz, 1H), 3.36-3.29 (m, 2H), 3.18 (dd,  $J = 9.2, 5.8$  Hz, 2H).<sup>13</sup>C NMR (100 MHz, CDCl<sub>3</sub>)  $\delta$  199.0, 140.6, 136.7, 133.2, 132.9, 130.8, 128.6, 128.1, 128.0, 127.7, 124.4, 38.6, 30.8.



## G. References

1. V. Balakrishnan, V. Murugesan, B. Chindan, R. Rasappan, *Org. Lett.* 2021, **23**, 1333.
2. X. Huo, M. Quan, G. Yang, X. Zhao, D. Liu, Y. Liu, W. Zhang, *Org. Lett.* 2014, **16**, 1570.
3. J. Tan, Z. Zhang, Z. Wang, *Org. Biomol. Chem.* 2008, **6**, 1344.
4. Z. Zhang, R. A. Widenhofer, *Org. Lett.* 2008, **10**, 2079.
5. J. L. Tao, B. Yang, Z.-X. Wang, *J. Org. Chem.* 2015, **80**, 12627.
6. Y. Li, W. Bao, *Adv. Synth. Catal.* 2009, **351**, 865.
7. A. Horn, U. Kazmaier, *Org. Lett.* 2019, **21**, 4595.
8. R. Matsubara, T. F. Jamison, *J. Am. Chem. Soc.* 2010, **132**, 6880.
9. H.-D. Xu, K. Xu, Q. Zheng, W.-J. He, M.-H. Shen, W.-H. Hu, *Tetrahedron Lett.* 2014, **55**, 6836.
10. N. Hu, H. Jung, Y. Zheng, J. Lee, L. Zhang, Z. Ullah, X. Xie, K. Harms, M.-H. Baik, E. Meggers, *Angew. Chem. Int. Ed.* 2018, **57**, 6242.
11. X. Li, Y. Li, Z. Zhang, X. Shi, R. Liu, Z. Wang, X. Li, D. Shi, *Org. Lett.* 2021, **23**, 6612.
12. H.-D. Xu, K. Xu, Q. Zheng, W.-J. He, M.-H. Shen, W.-H. Hu, *Tetrahedron Lett.* 2014, **55**, 6836.
13. C. M. Par, M. S. Kwon, J. Park, *Synthesis*, 2006, **22**, 3790.
14. T. B. Nguyen, P. Retailleau, *Org. Lett.* 2017, **19**, 4858.

# I. NMR Spectrum

## <sup>1</sup>H NMR for (3-methoxybut-1-en-1-yl)benzene (3a)

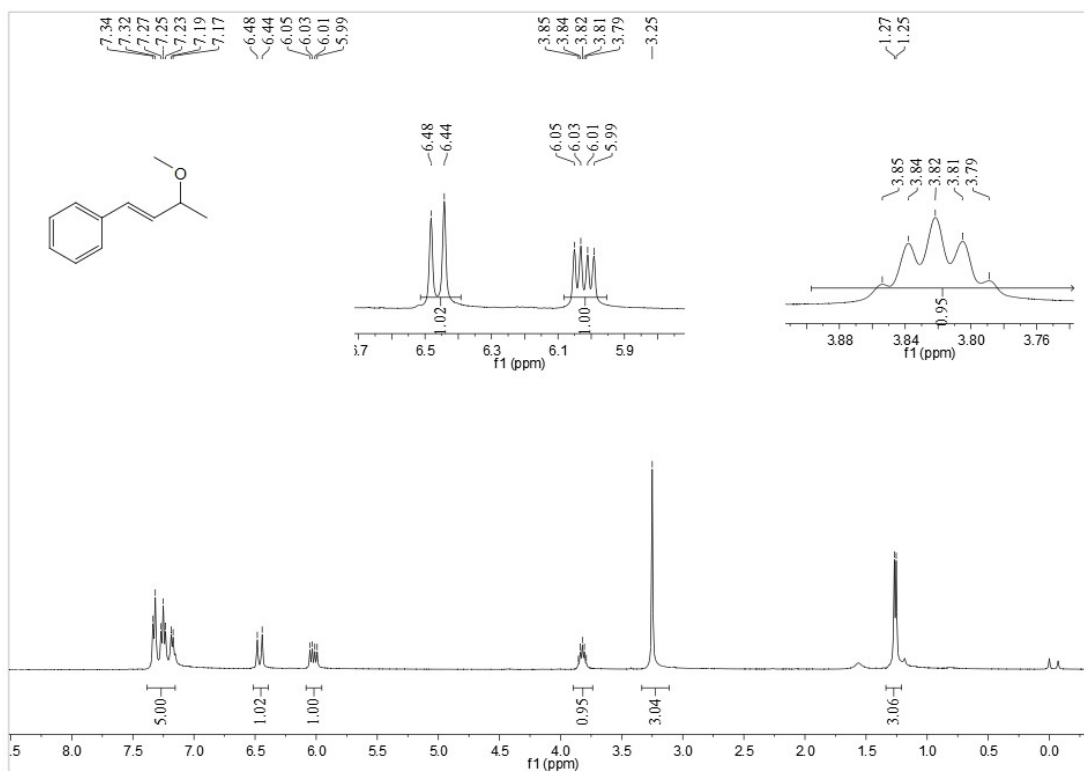

## <sup>13</sup>C NMR for (3-methoxybut-1-en-1-yl)benzene (3a)

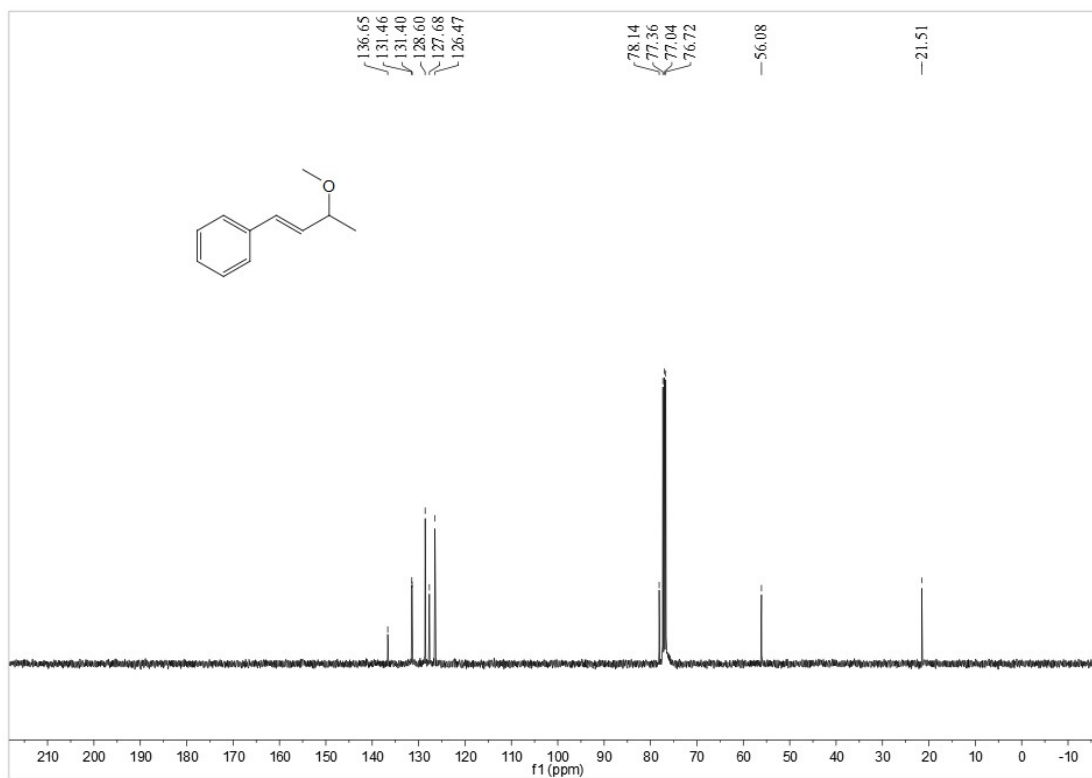

### <sup>1</sup>H NMR for (3-ethoxybut-1-en-1-yl)benzene (3b)

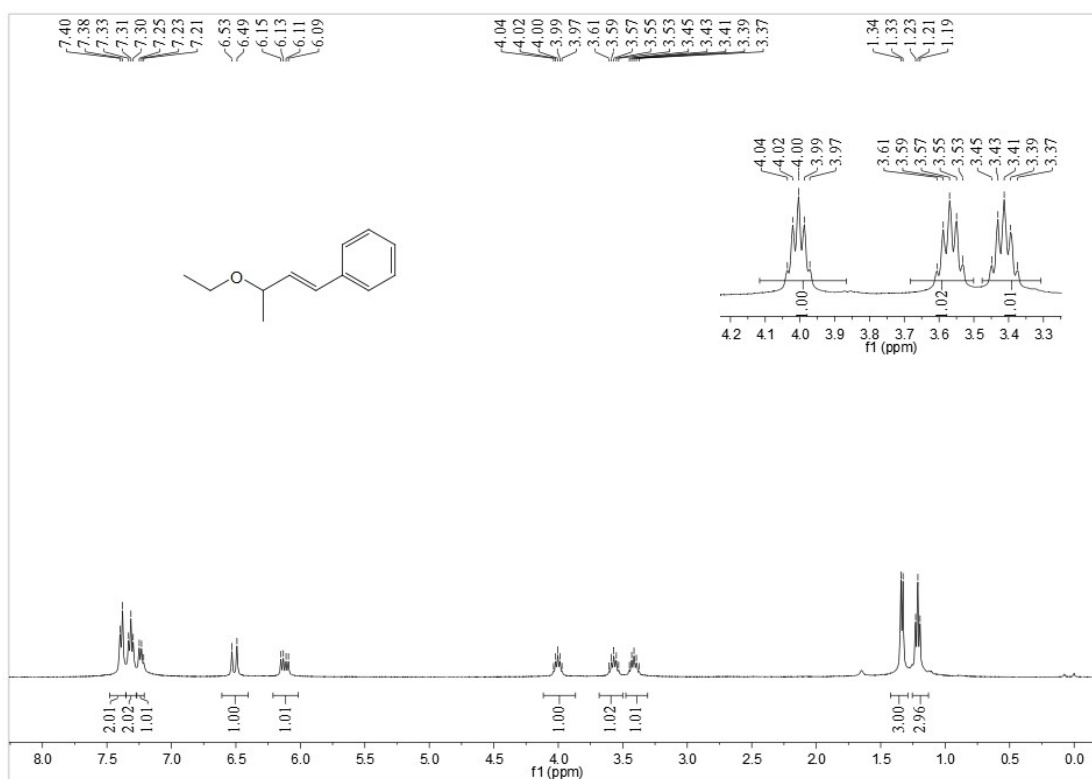

### <sup>13</sup>C NMR for (3-ethoxybut-1-en-1-yl)benzene (3b)

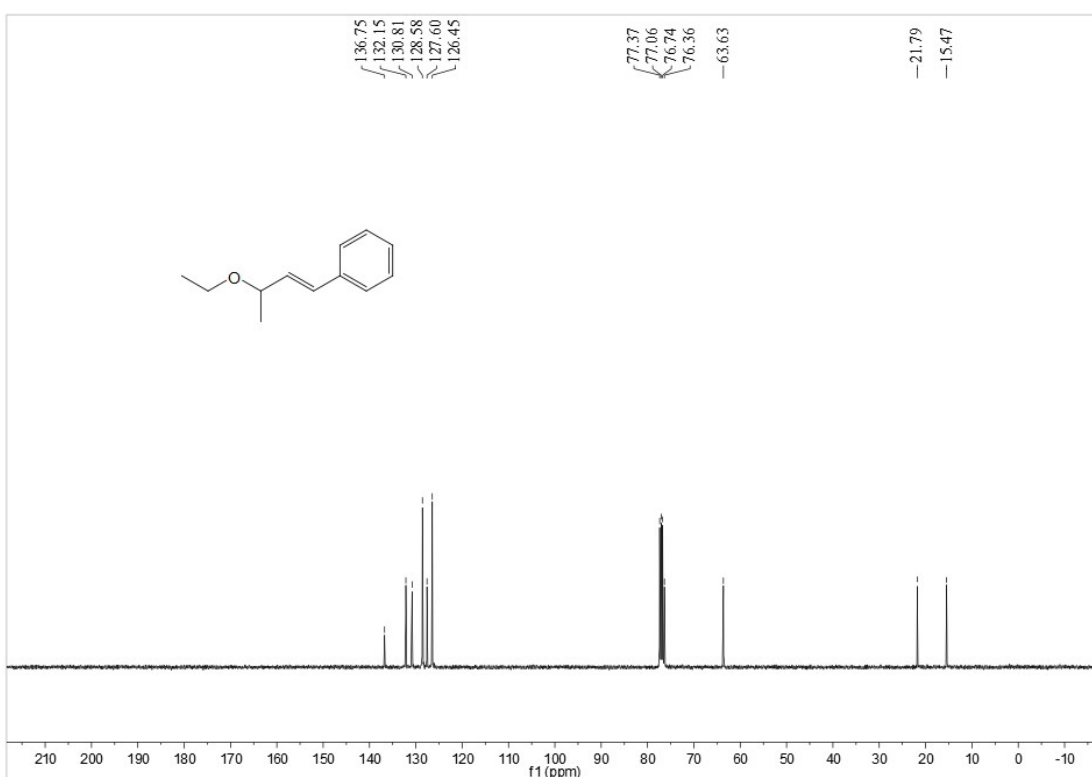

### <sup>1</sup>H NMR for (3-propoxybut-1-en-1-yl)benzene (3c)

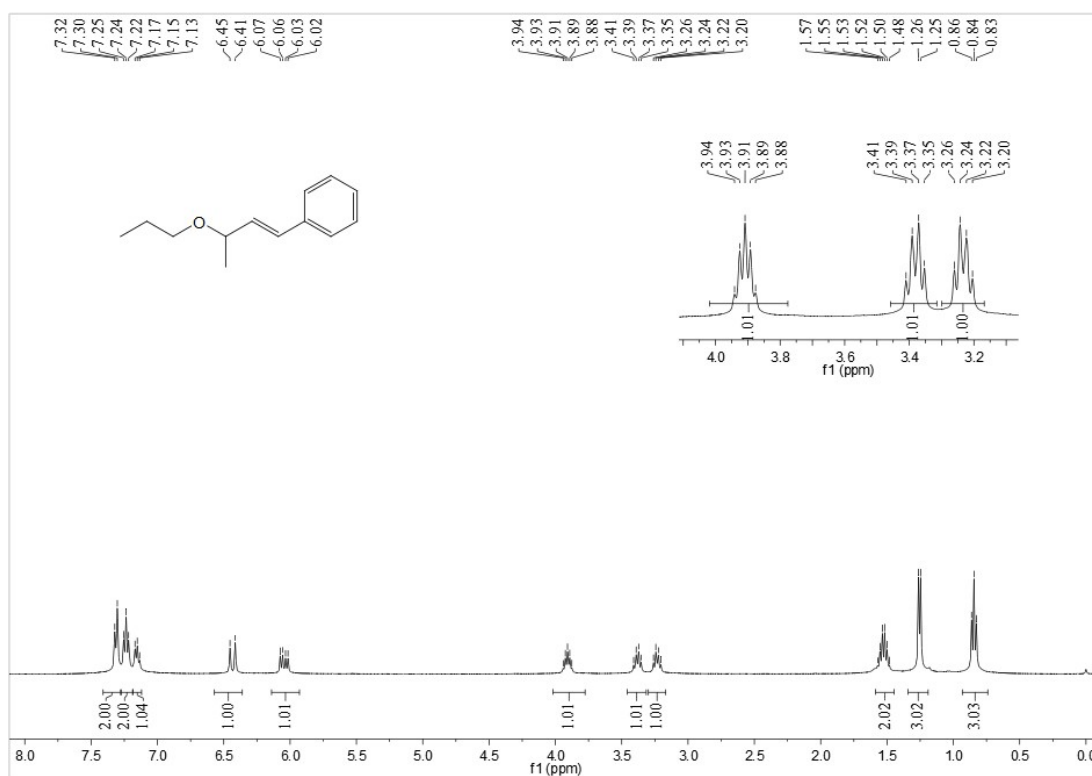

### <sup>13</sup>C NMR for (3-propoxybut-1-en-1-yl)benzene (3c)

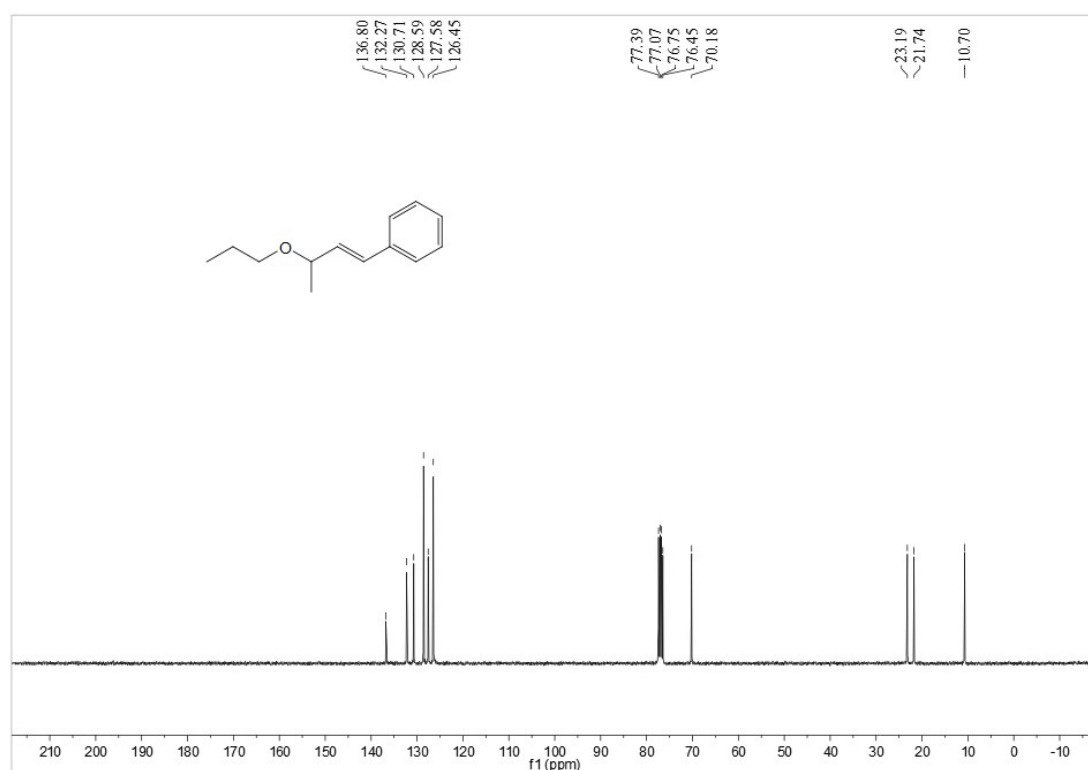

### <sup>1</sup>H NMR for (3-butoxybut-1-en-1-yl)benzene (3d)

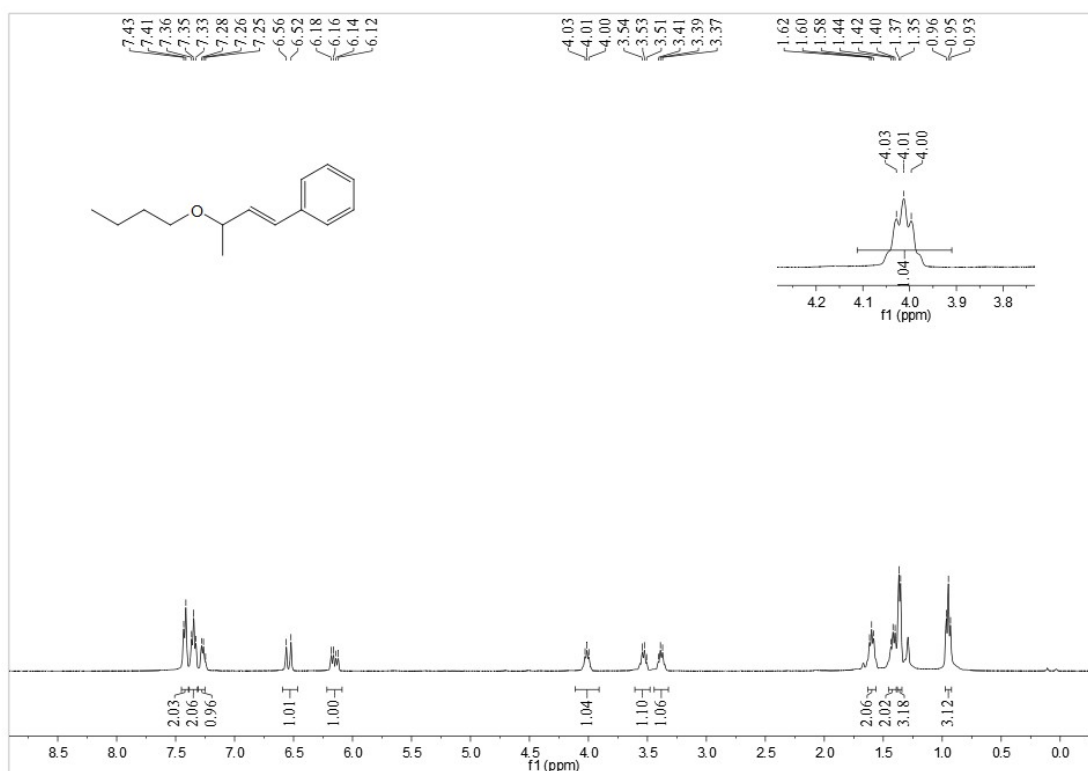

### <sup>13</sup>C NMR for (3-butoxybut-1-en-1-yl)benzene (3d)

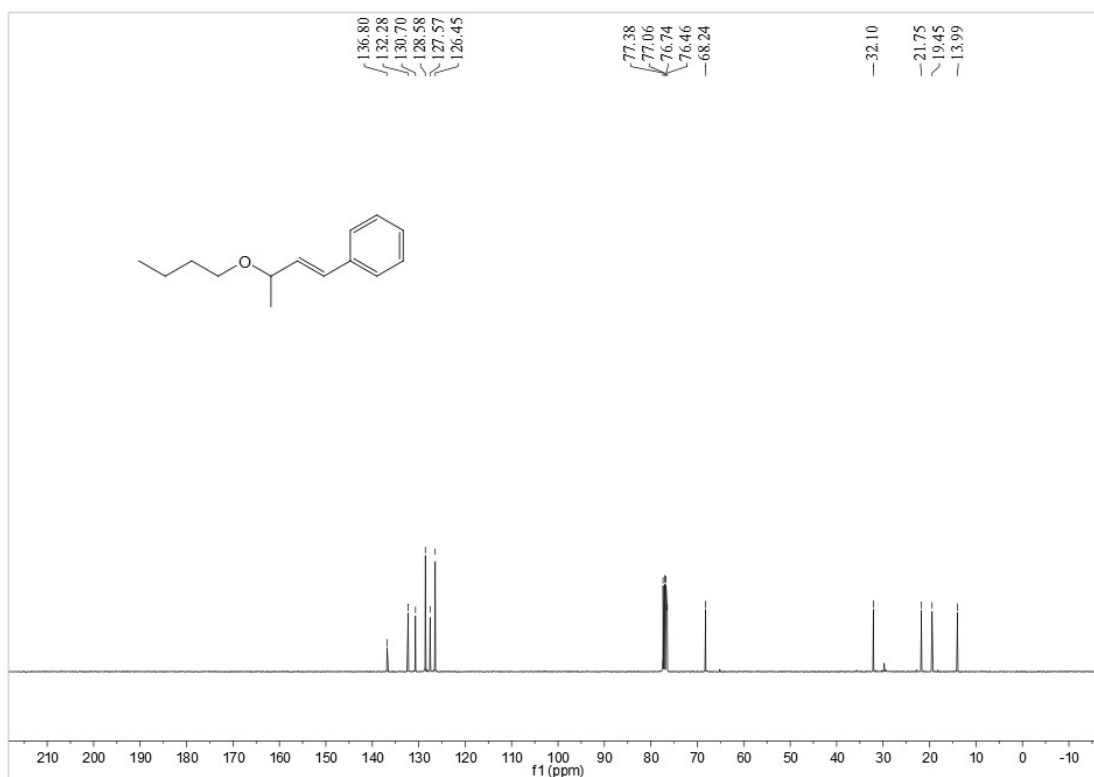

### <sup>1</sup>H NMR for (3-(pentyloxy)but-1-en-1-yl)benzene (3e)

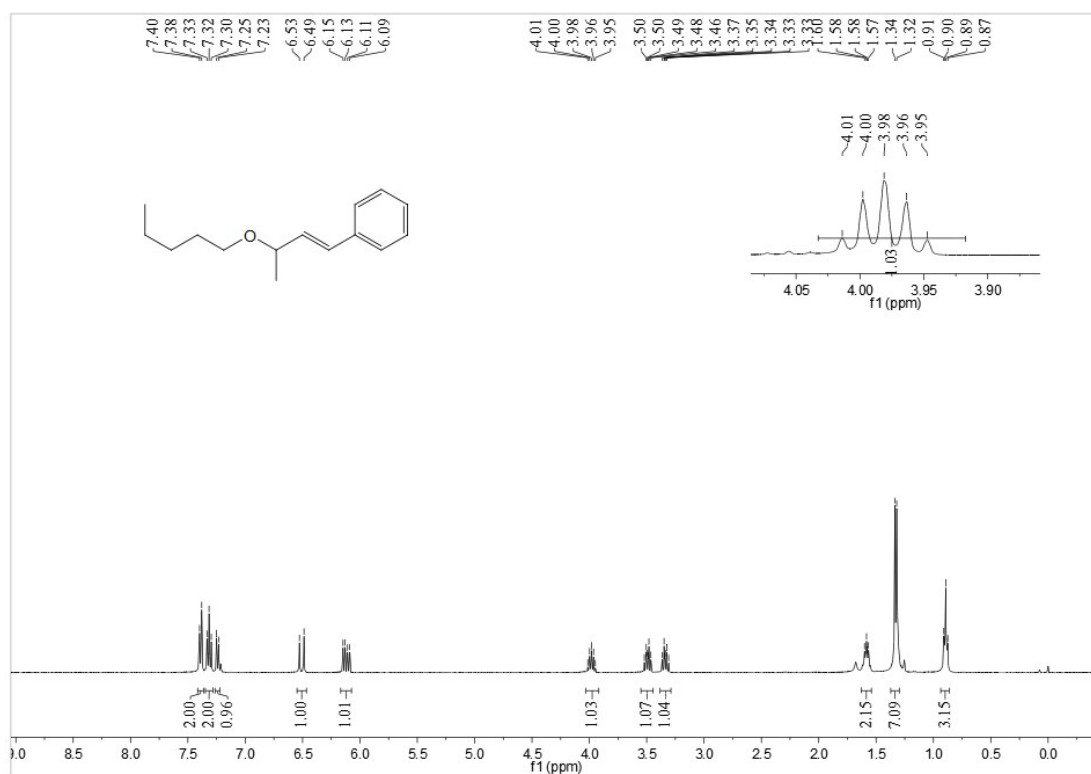

### <sup>13</sup>C NMR for (3-(pentyloxy)but-1-en-1-yl)benzene (3e)

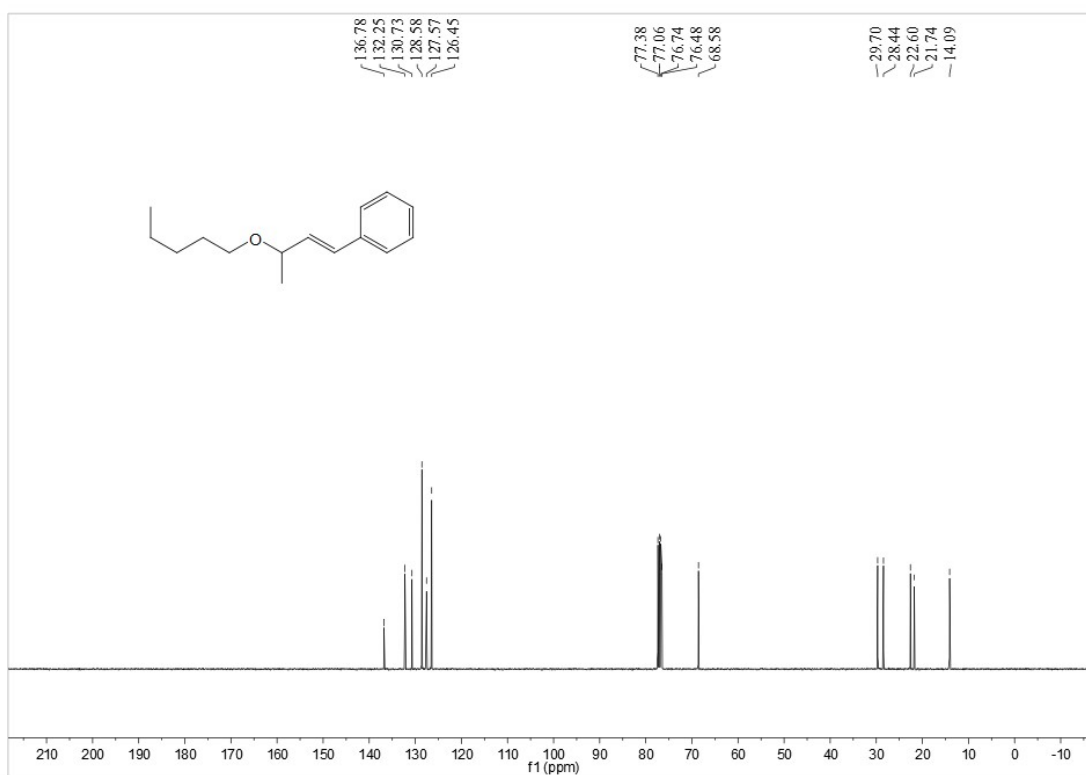

### <sup>1</sup>H NMR for (3-(heptyloxy)but-1-en-1-yl)benzene (3f)

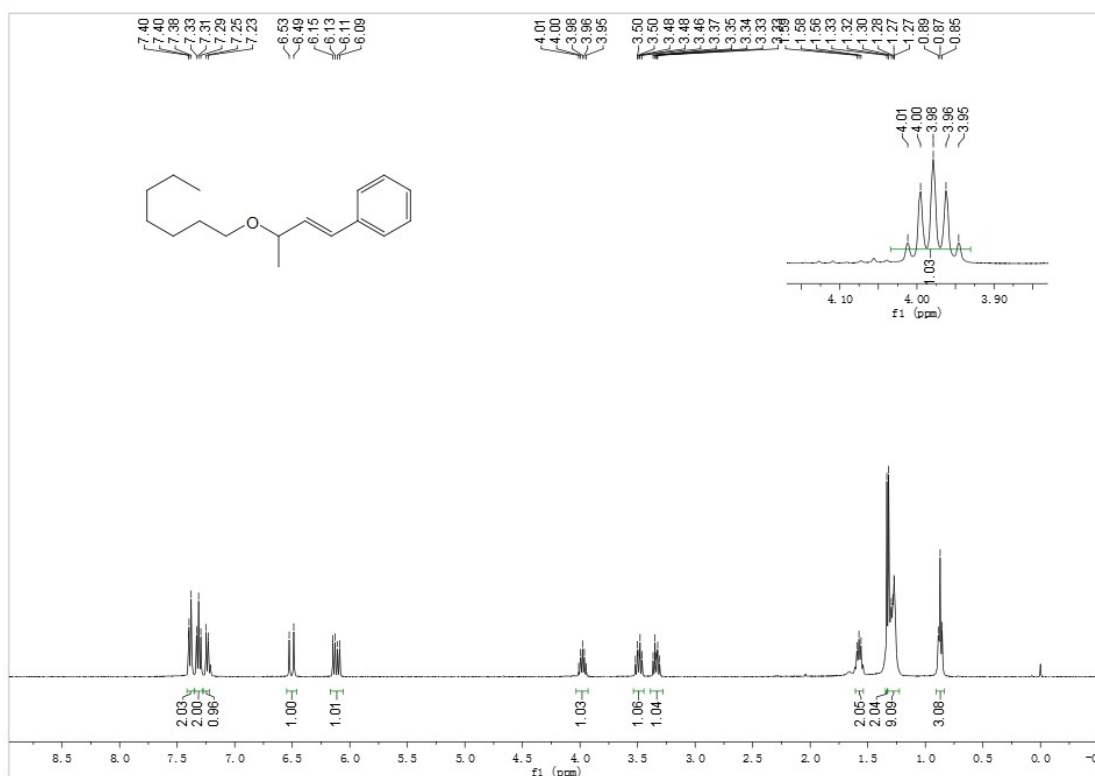

### <sup>13</sup>C NMR for (3-(heptyloxy)but-1-en-1-yl)benzene e (3f)

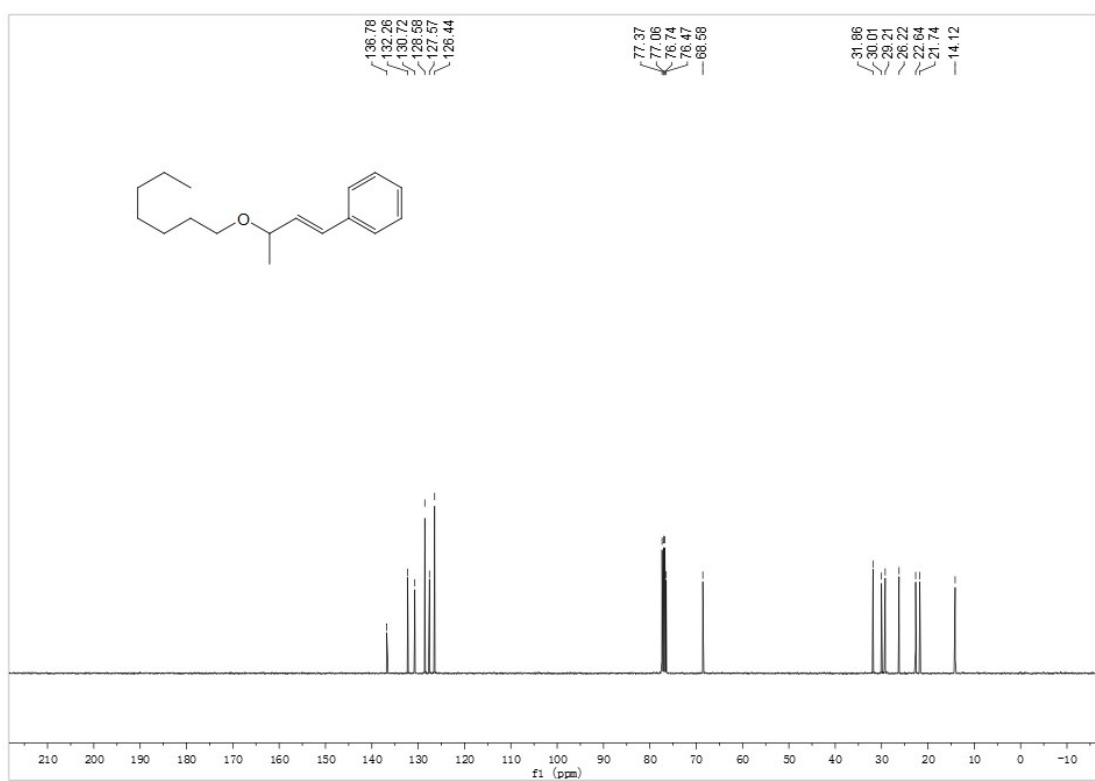

### <sup>1</sup>H NMR for (3-(isopentyloxy)but-1-en-1-yl)benzene (3g)

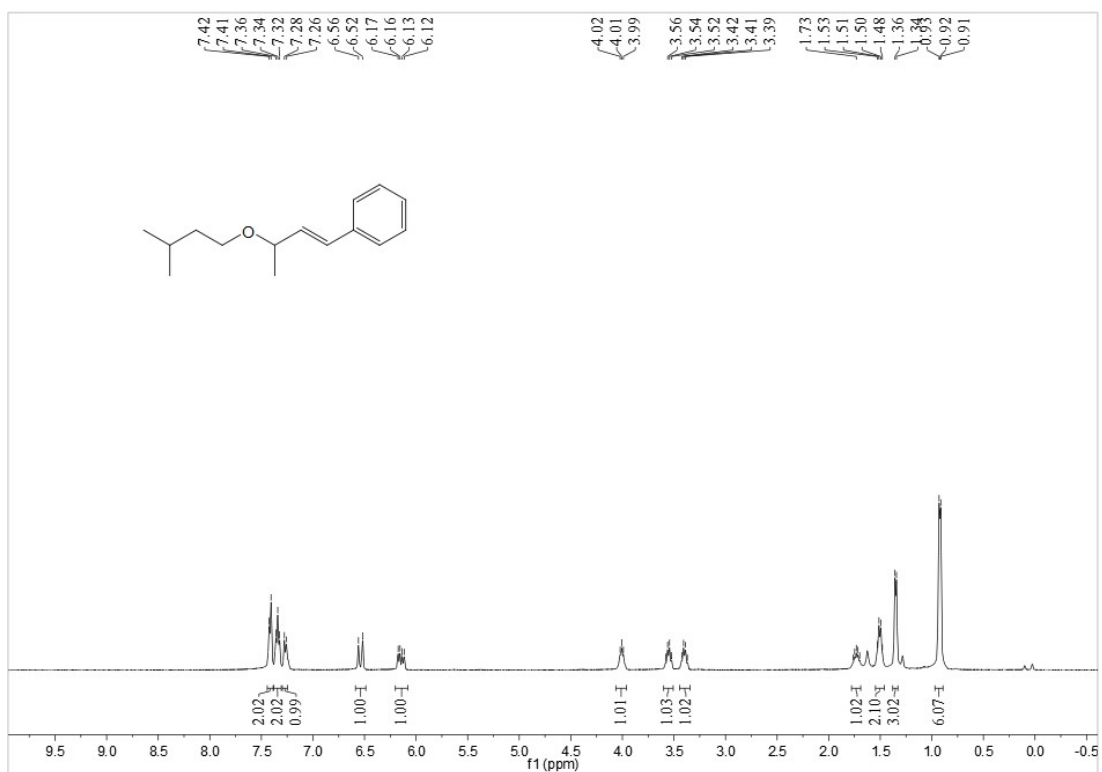

### <sup>13</sup>C NMR for (3-(isopentyloxy)but-1-en-1-yl)benzene (3g)

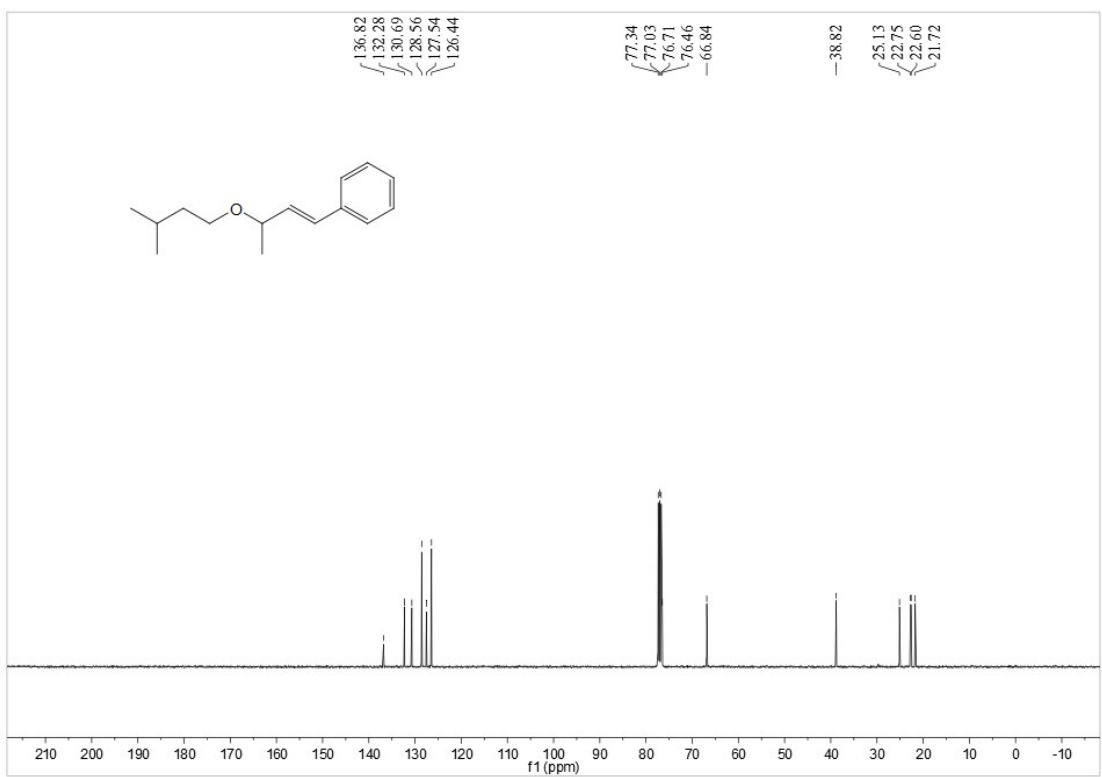



### <sup>1</sup>H NMR for (3-(2-ethylbutoxy)but-1-en-1-yl)benzene (3h)

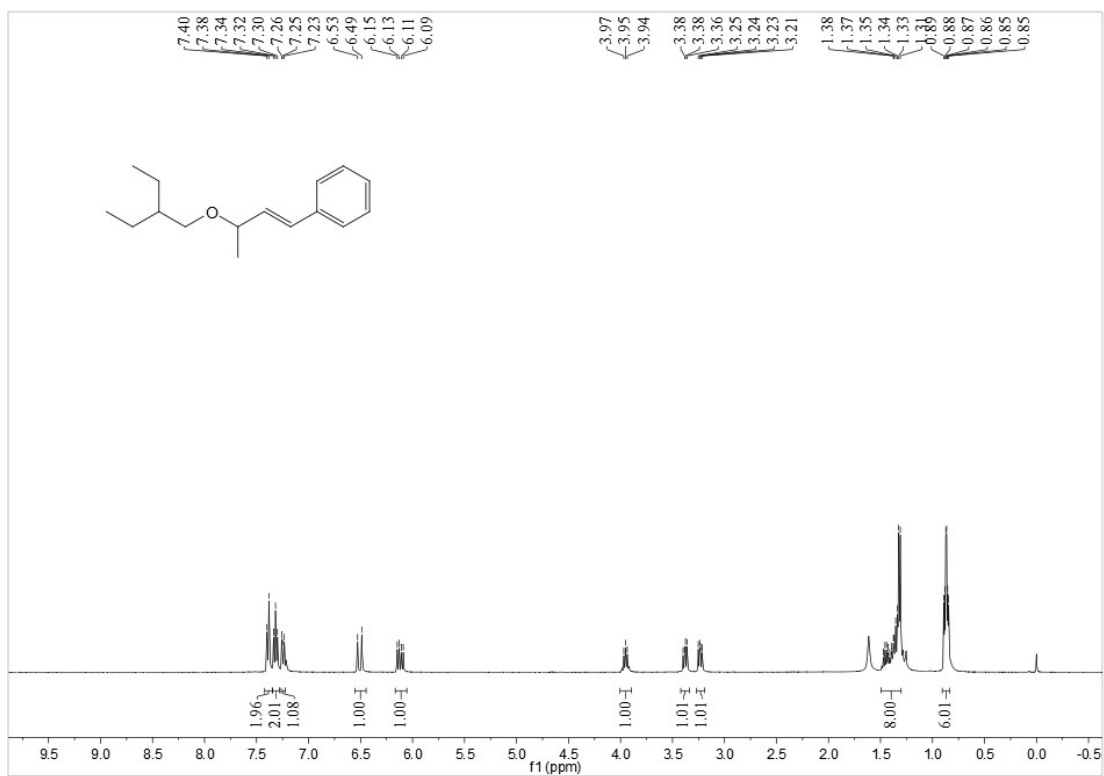

### <sup>13</sup>C NMR for (3-(2-ethylbutoxy)but-1-en-1-yl)benzene (3h)

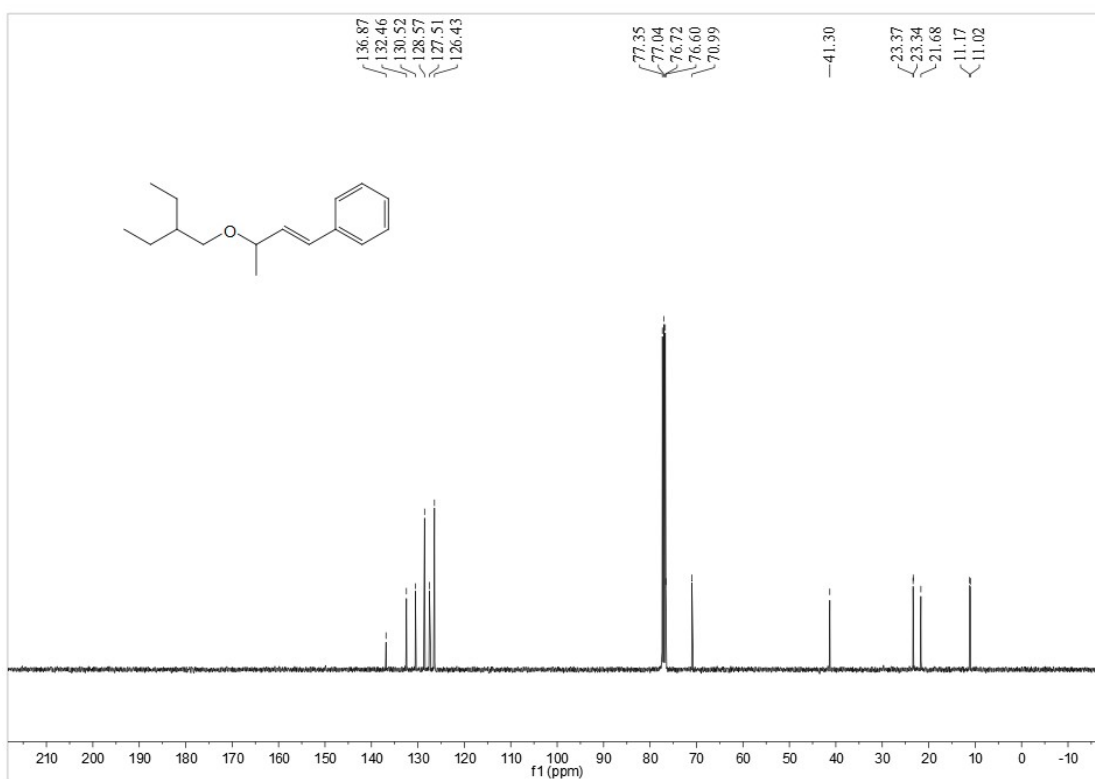

### <sup>1</sup>H NMR for (3-(cyclopropylmethoxy)but-1-en-1-yl)benzene (3i)

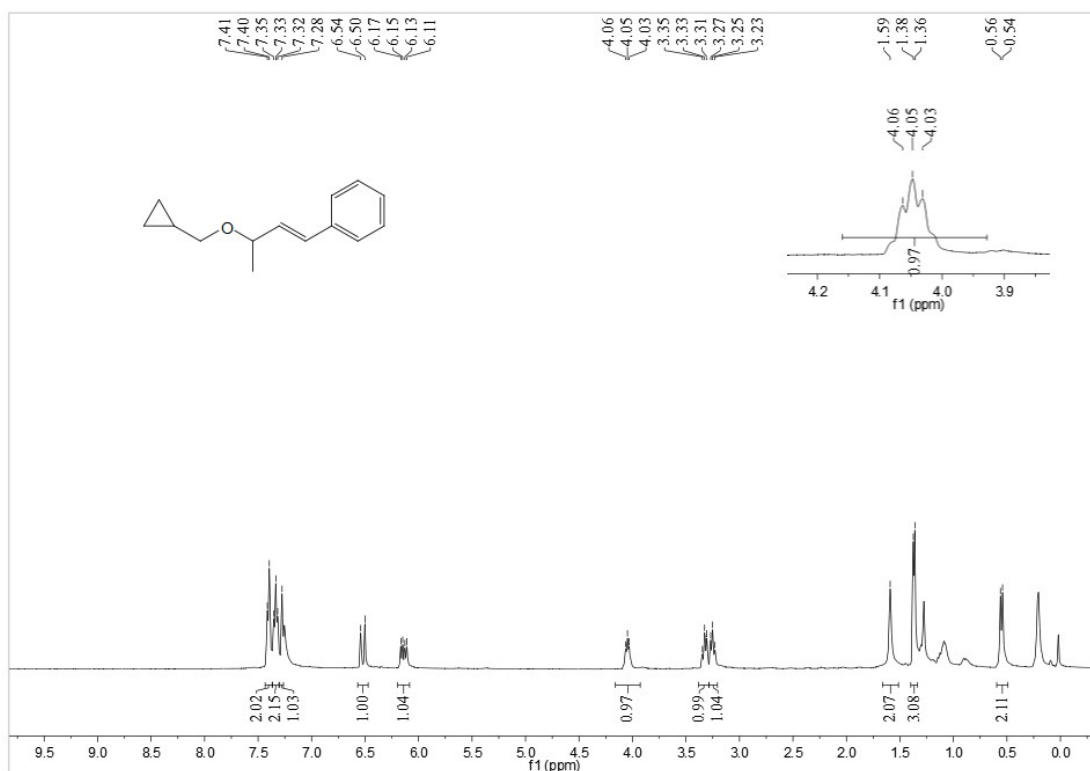

### <sup>13</sup>C NMR for (3-(cyclopropylmethoxy)but-1-en-1-yl)benzene (3i)

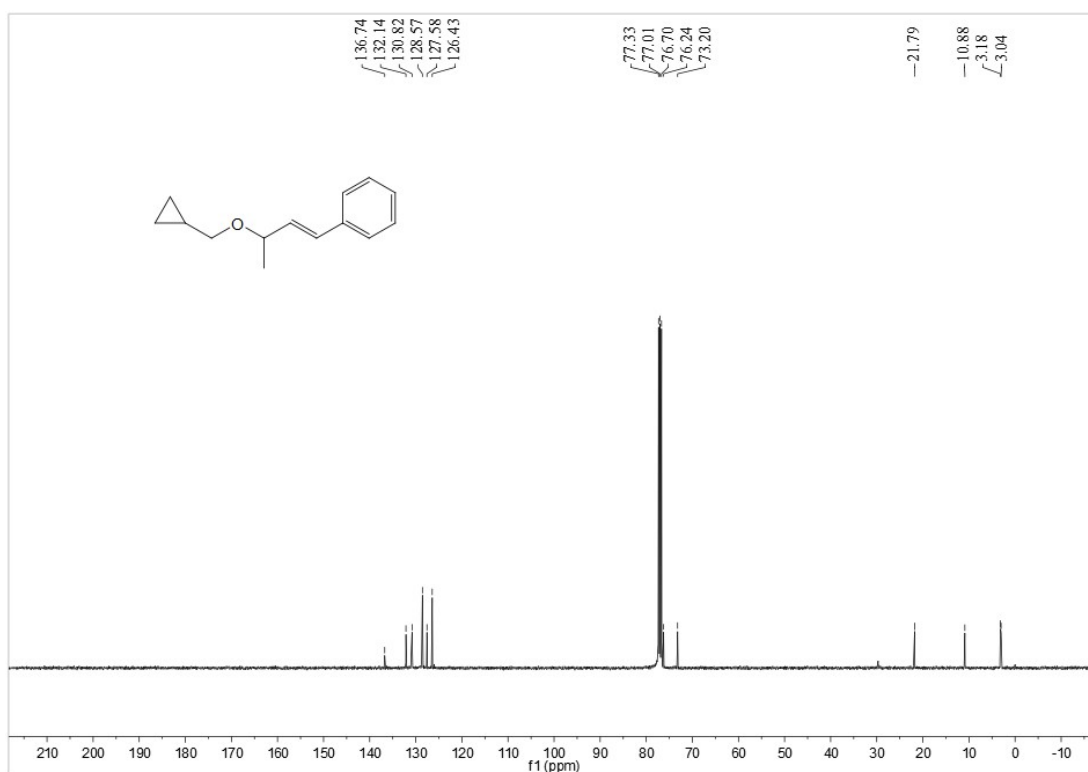

### <sup>1</sup>H NMR for (3-(cyclopropylmethoxy)but-1-en-1-yl)benzene (3j)

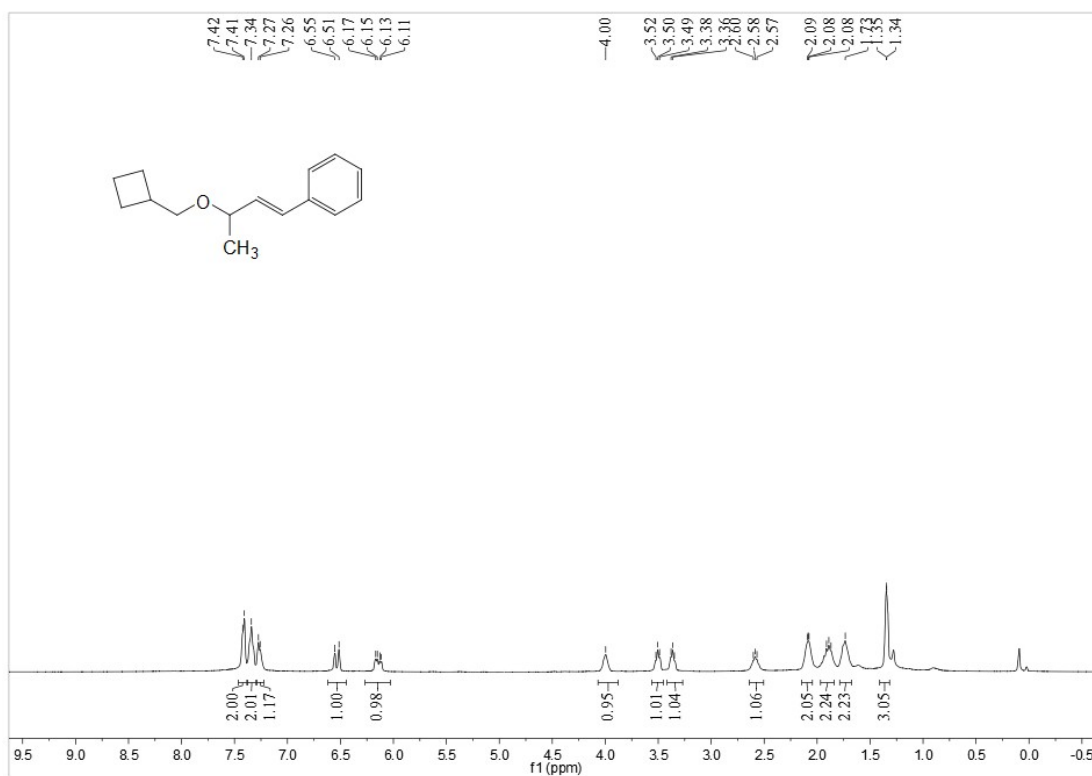

### <sup>13</sup>C NMR for (3-(cyclopropylmethoxy)but-1-en-1-yl)benzene (3j)

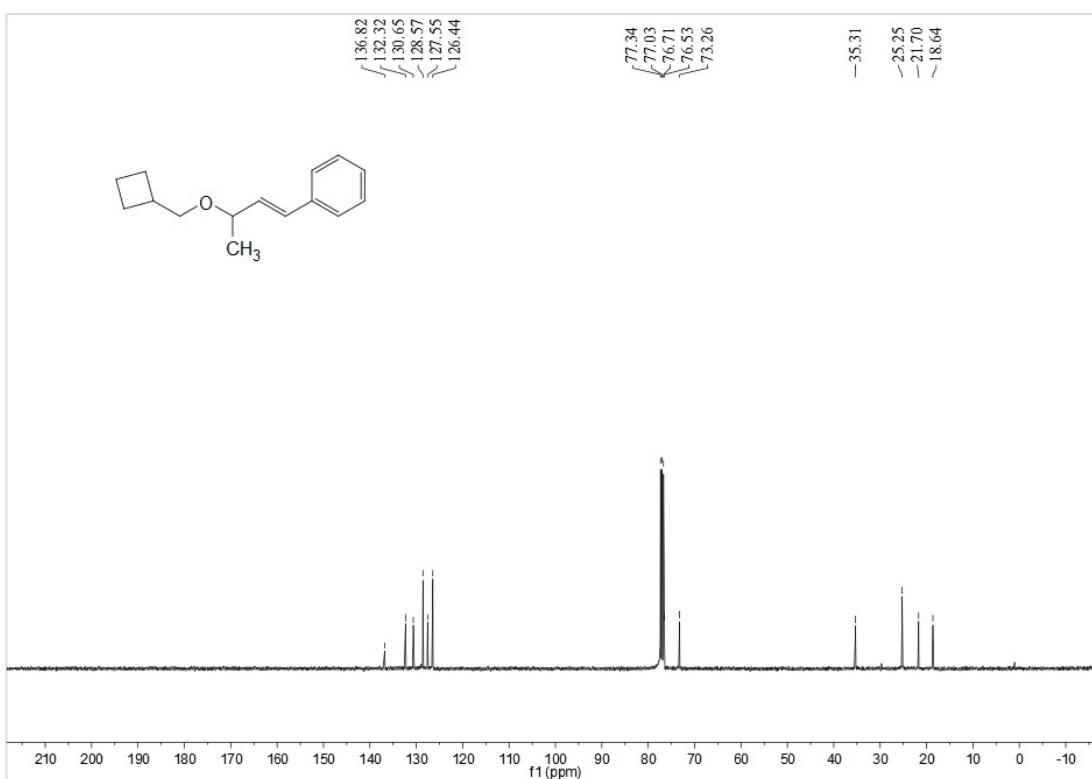

### <sup>1</sup>H NMR for (3-(cyclopentylmethoxy)but-1-en-1-yl)benzene (3k)

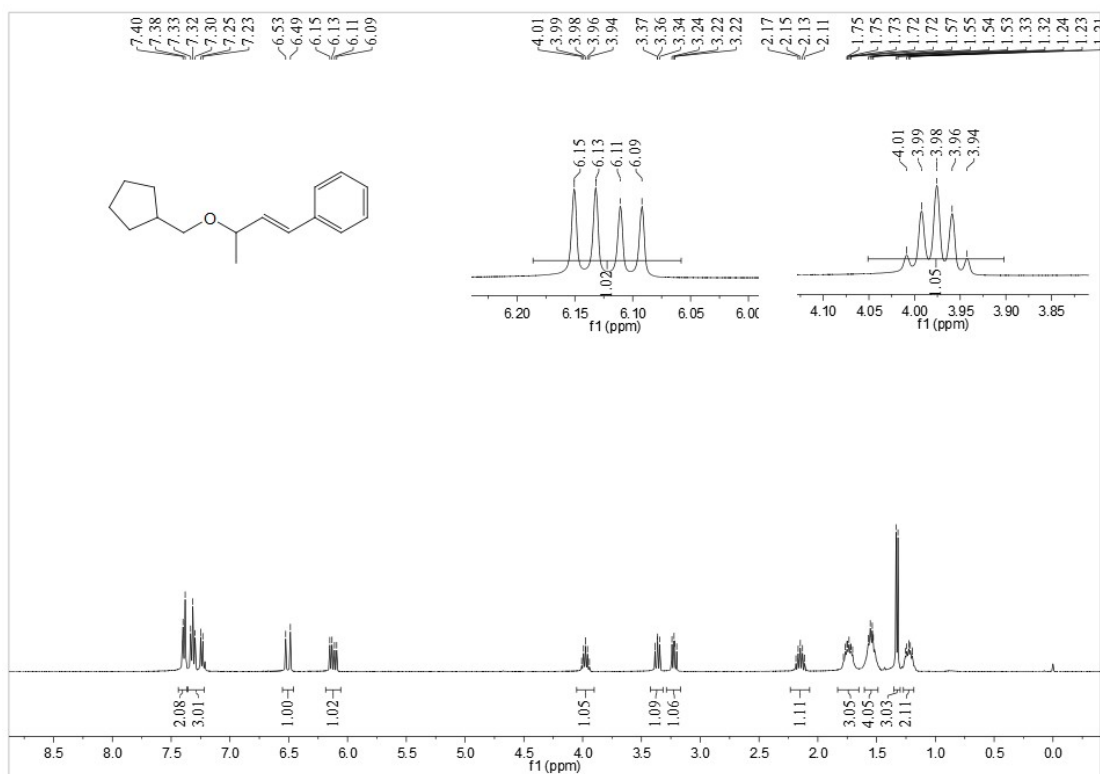

### <sup>13</sup>C NMR for (3-(cyclopentylmethoxy)but-1-en-1-yl)benzene (3k)

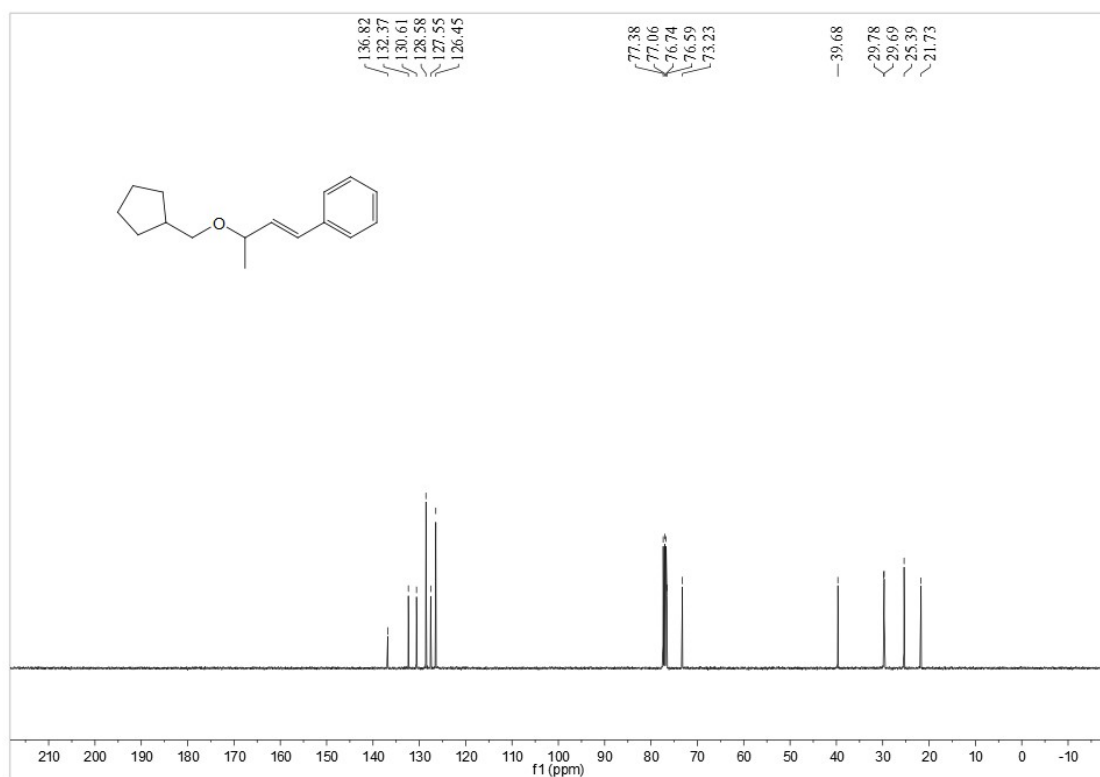

### <sup>1</sup>H NMR for (3-(cyclohexylmethoxy)but-1-en-1-yl)benzene (3l)

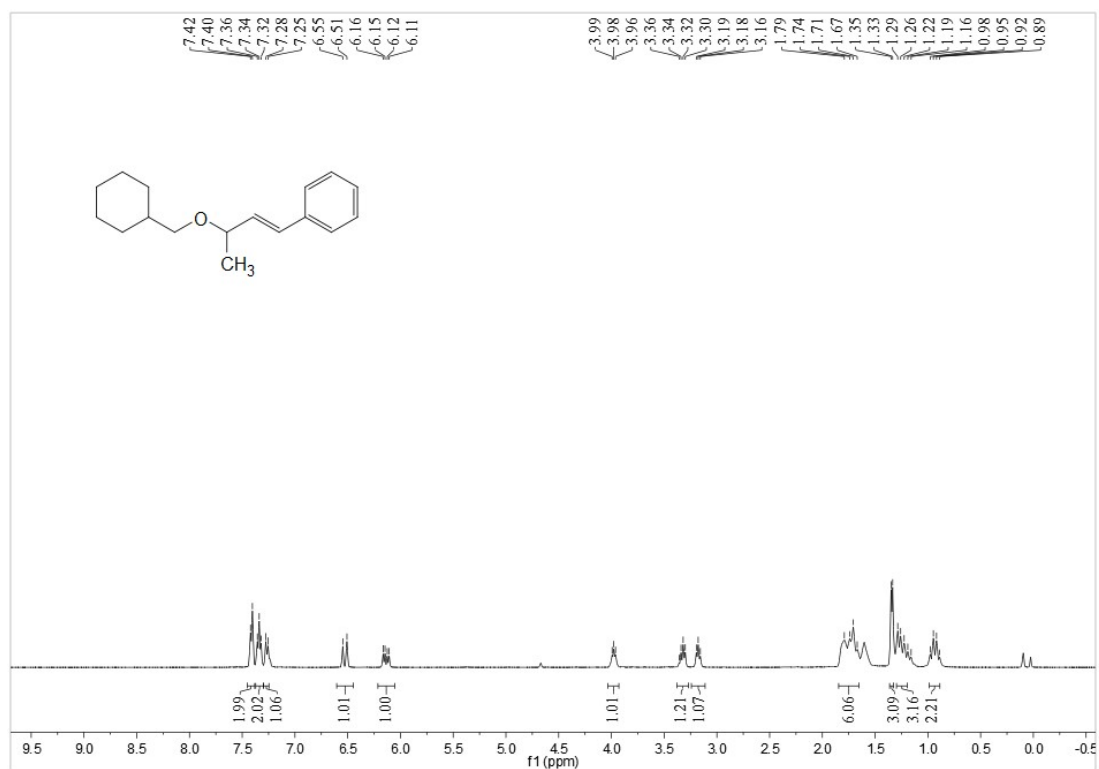

### <sup>13</sup>C NMR for (3-(cyclohexylmethoxy)but-1-en-1-yl)benzene (3l)

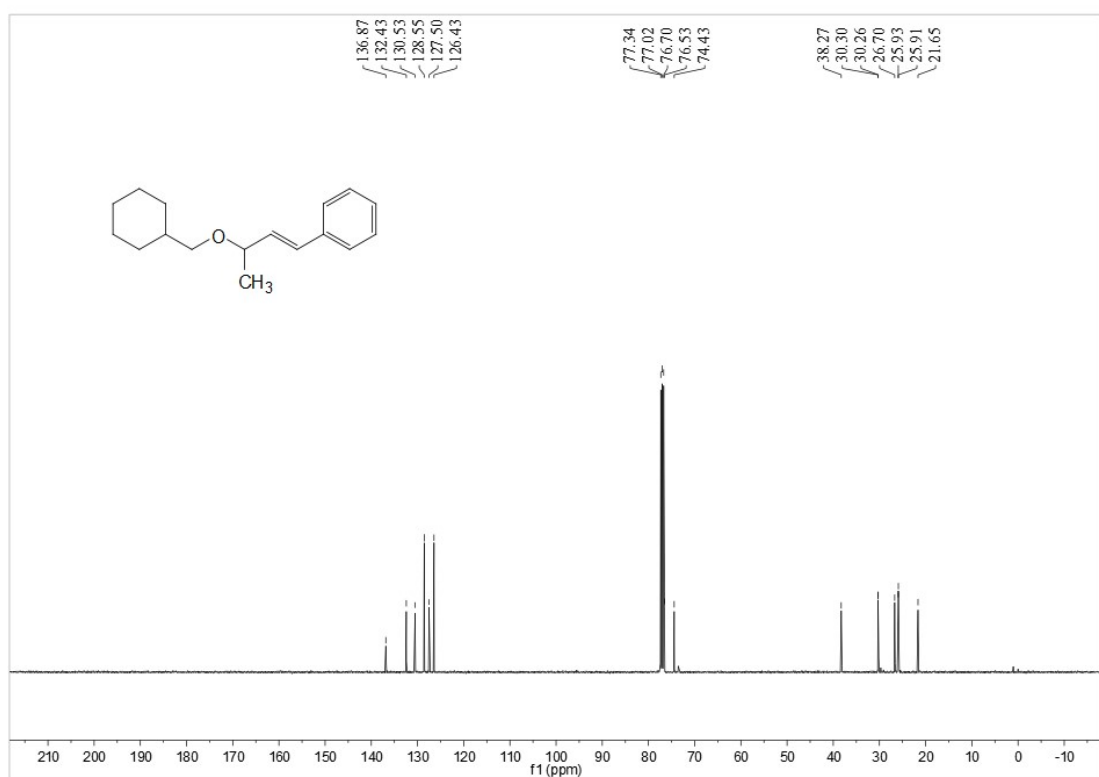

### <sup>1</sup>H NMR for (3-(2-cyclopropylethoxy)but-1-en-1-yl)benzene (3m)

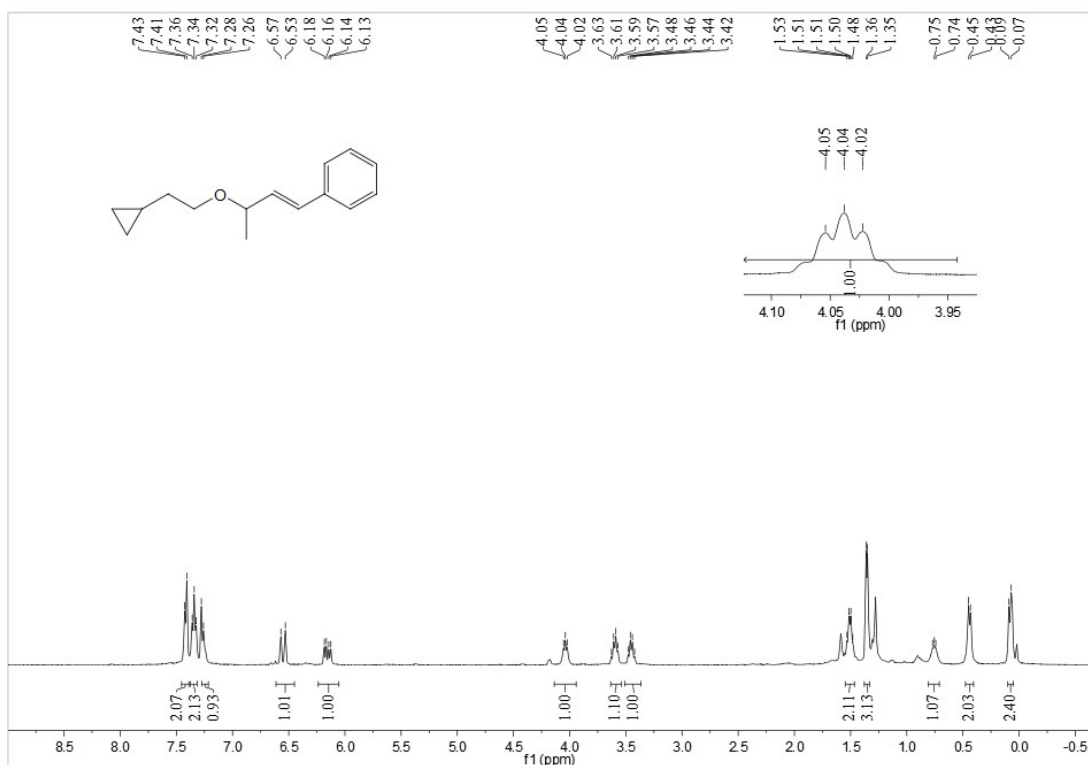

### <sup>13</sup>C NMR for (3-(2-cyclopropylethoxy)but-1-en-1-yl)benzene (3m)

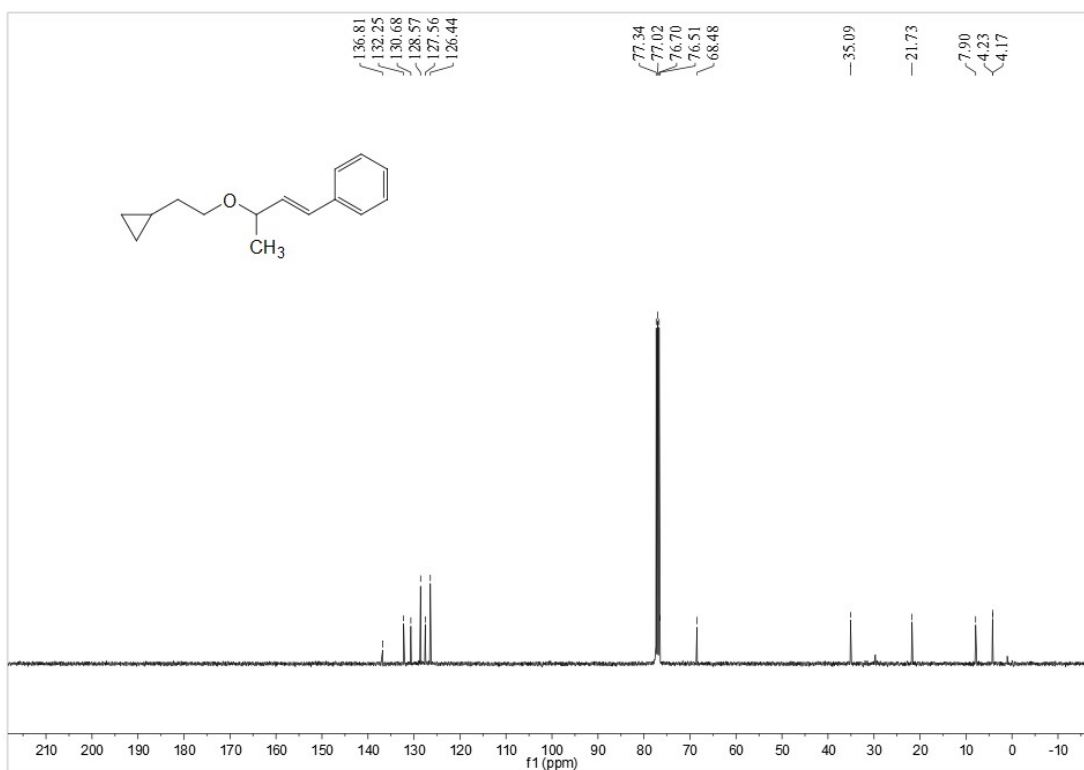

### <sup>1</sup>H NMR for (3-(2-cyclohexylethoxy)but-1-en-1-yl)benzene (3n)

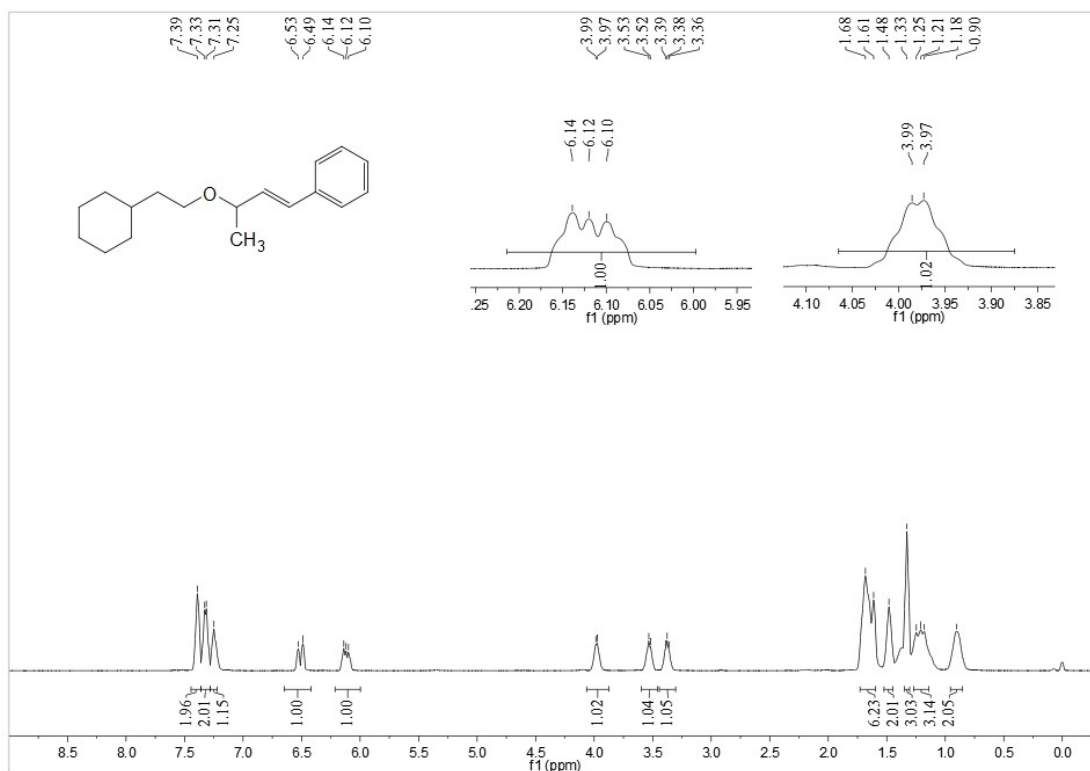

### <sup>13</sup>C NMR for (3-(2-cyclohexylethoxy)but-1-en-1-yl)benzene (3n)

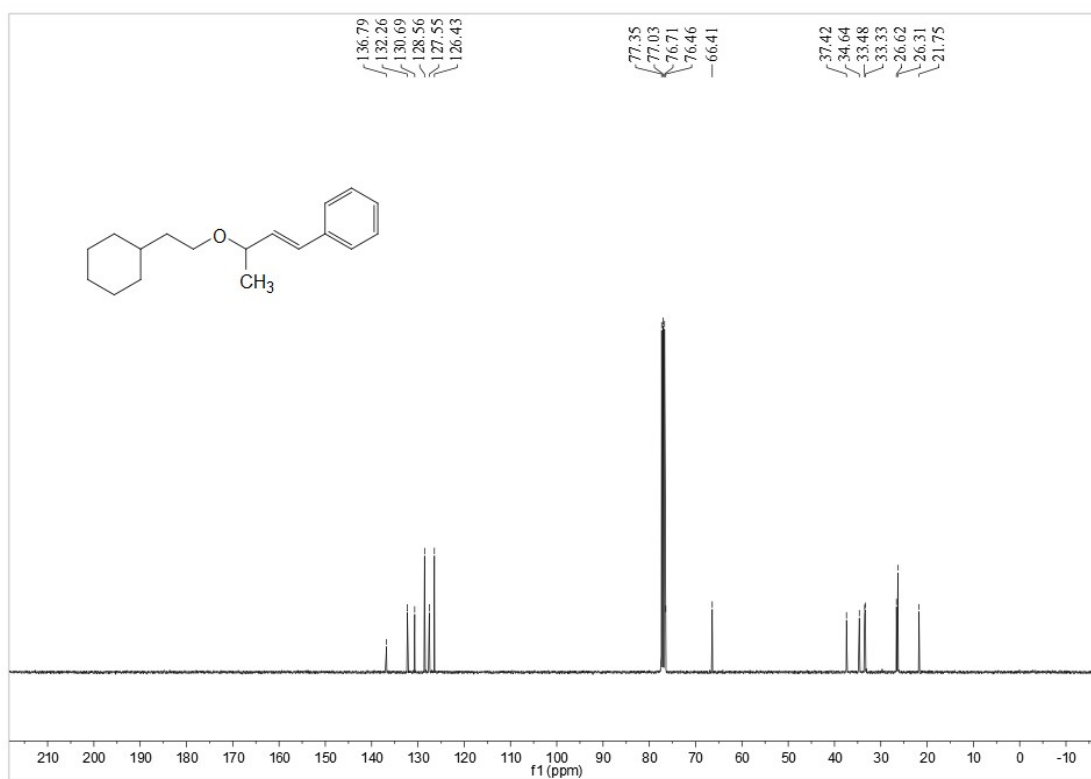

### <sup>1</sup>H NMR for 1-fluoro-4-(3-methoxybut-1-en-1-yl)benzene(3o)

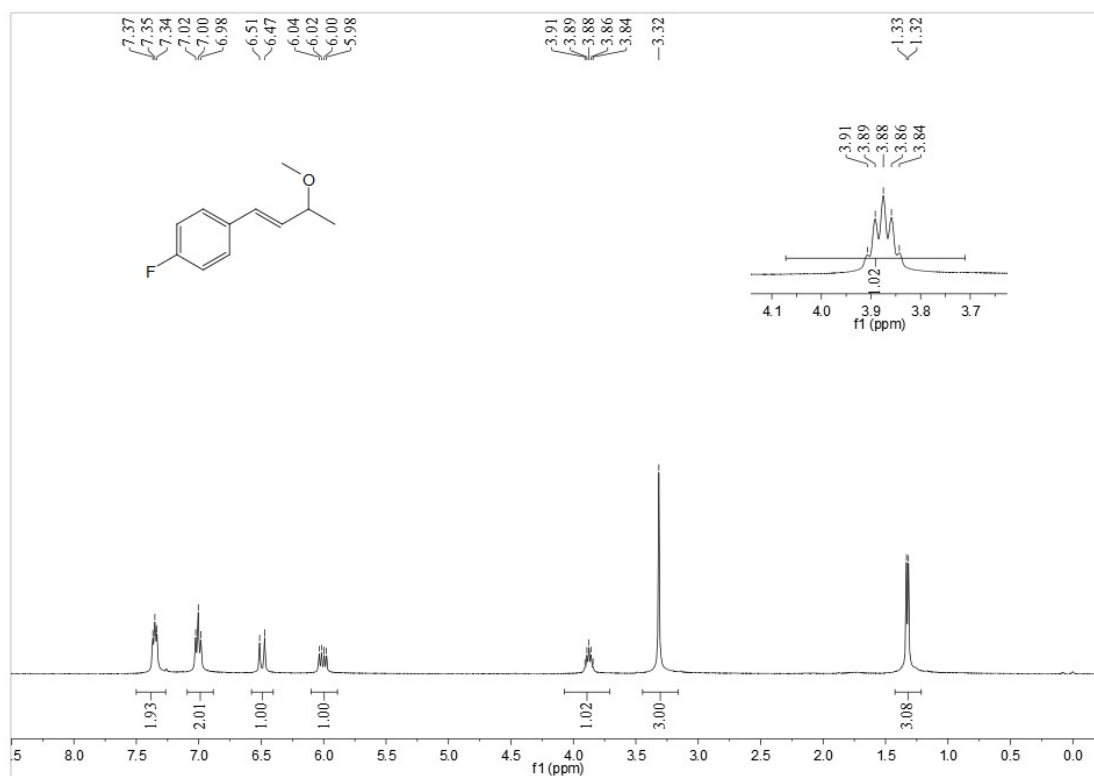

### <sup>13</sup>C NMR for 1-fluoro-4-(3-methoxybut-1-en-1-yl)benzene(3o)

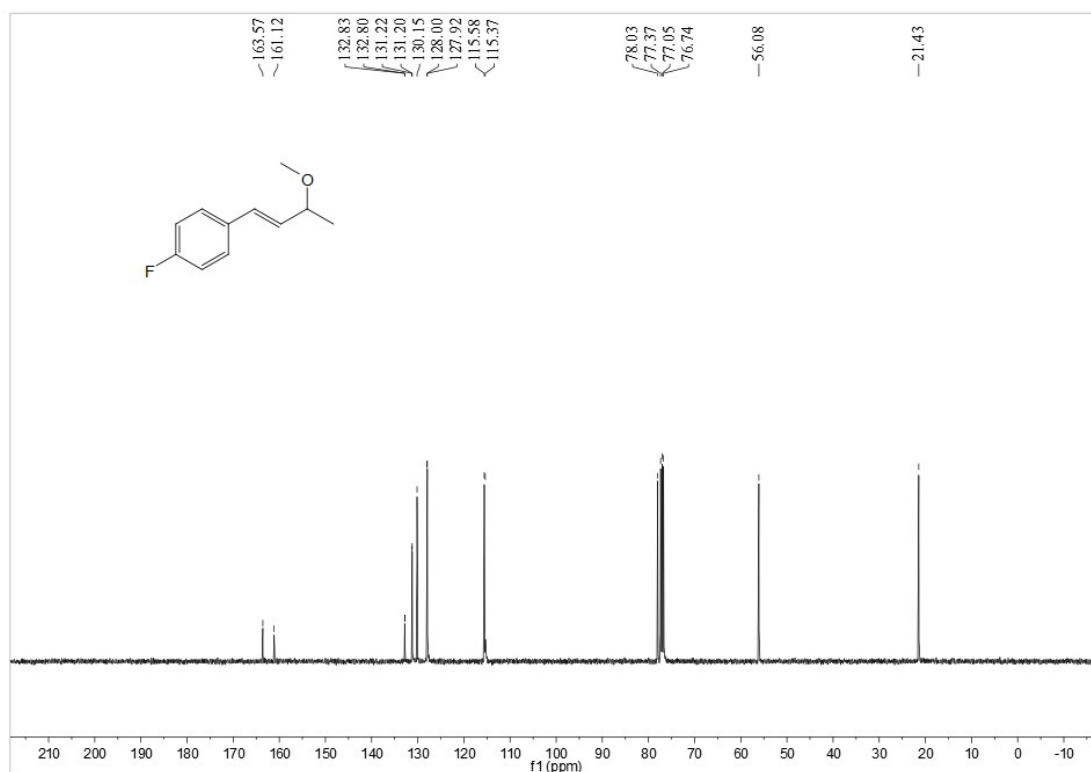



### <sup>1</sup>H NMR for 1-bromo-4-(3-methoxybut-1-en-1-yl)benzene(3p)

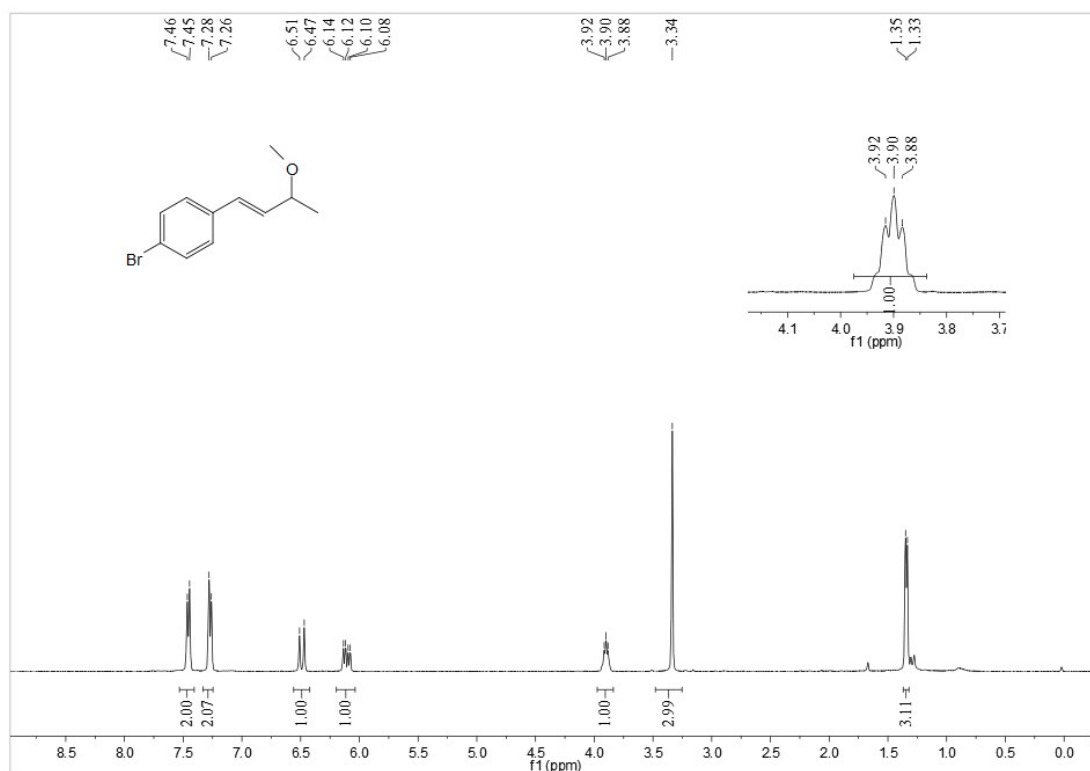

### <sup>13</sup>C NMR for 1-bromo-4-(3-methoxybut-1-en-1-yl)benzene(3p)

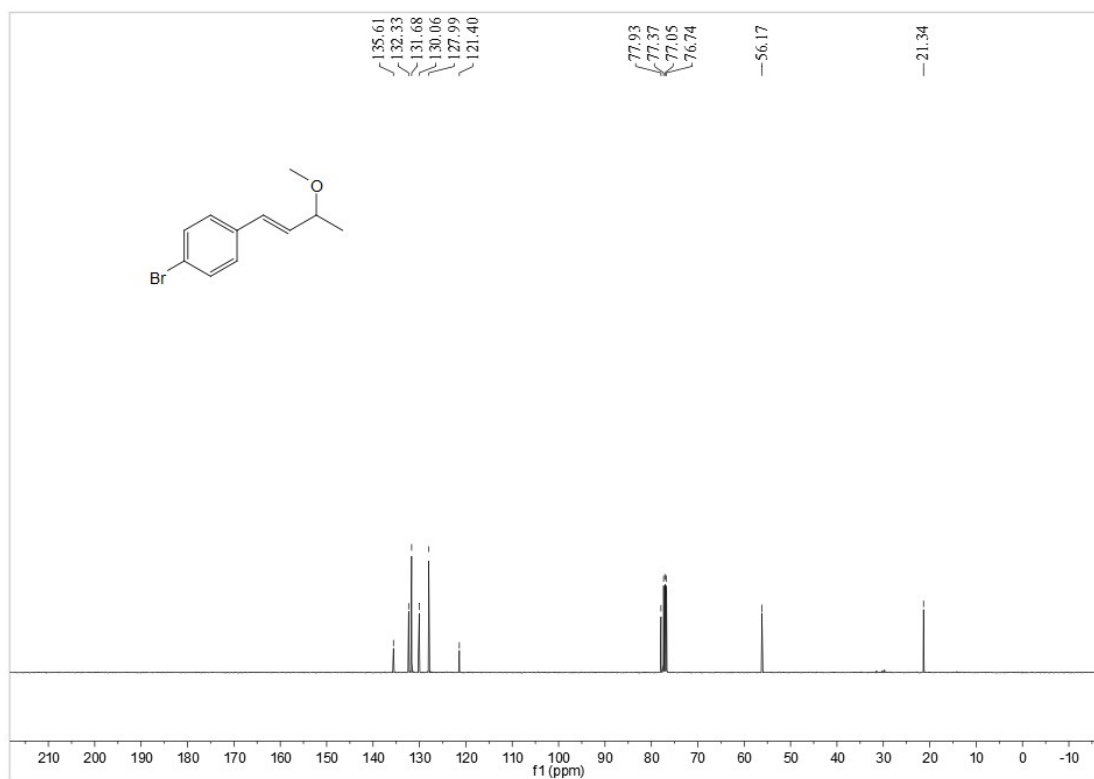

### <sup>1</sup>H NMR for 1-chloro-2-(3-methoxybut-1-en-1-yl)benzene (3q)

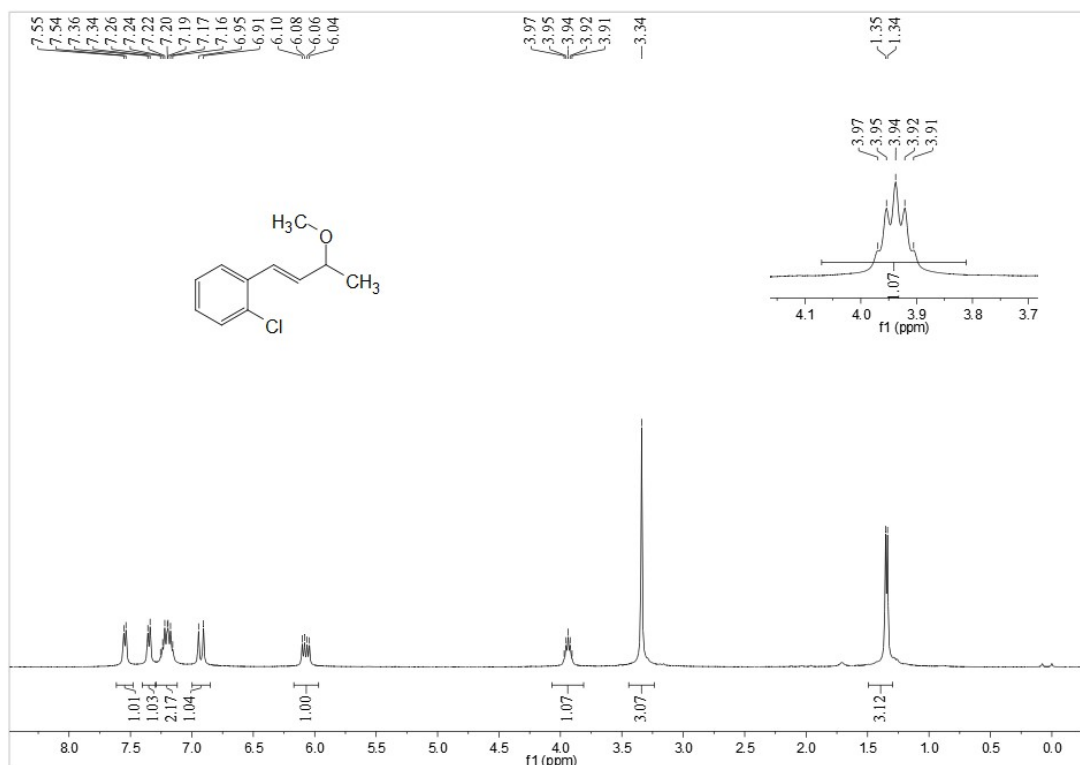

### <sup>13</sup>C NMR for 1-chloro-2-(3-methoxybut-1-en-1-yl)benzene(3q)

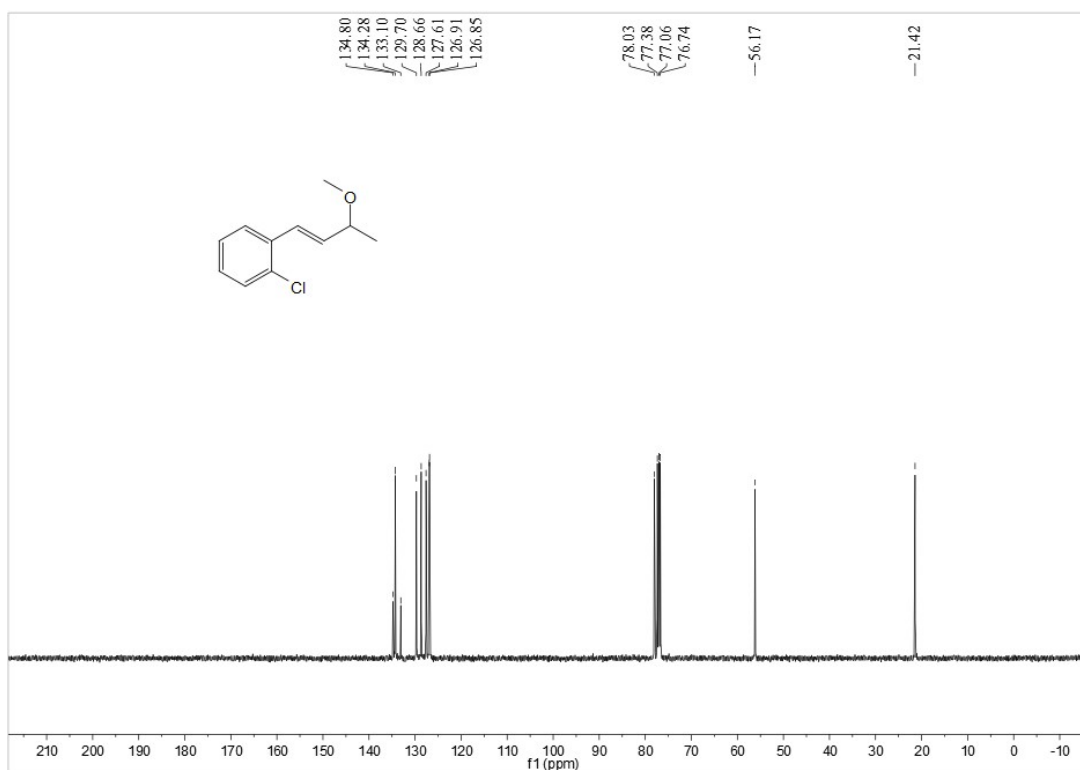

### <sup>1</sup>H NMR for 1-(3-methoxybut-1-en-1-yl)-2,3-dimethylbenzene (3r)

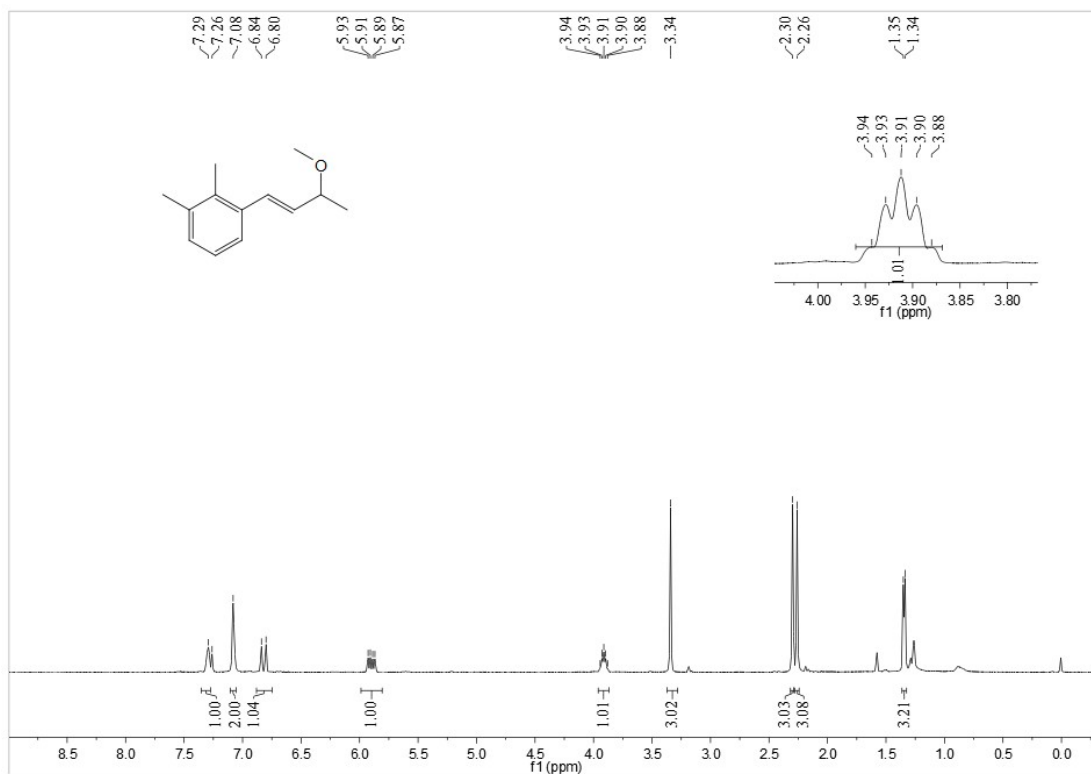

### <sup>13</sup>C NMR for 1-(3-methoxybut-1-en-1-yl)-2,3-dimethylbenzene (3r)

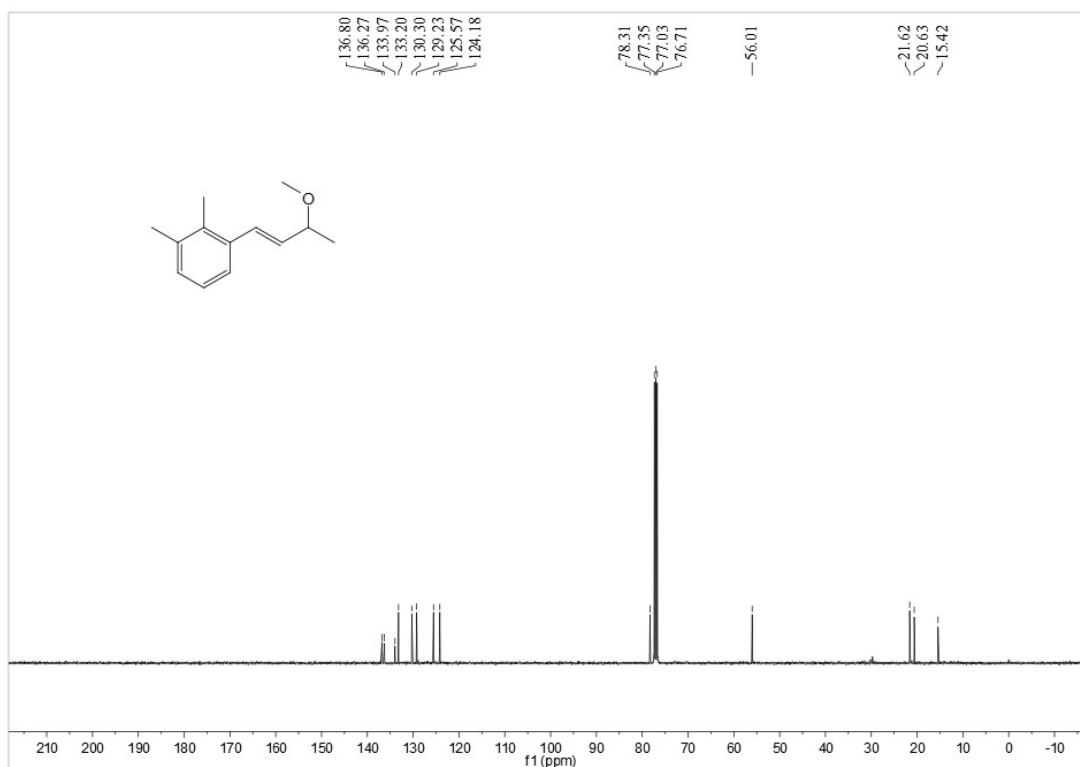

### <sup>1</sup>H NMR for 2,4-difluoro-1-(3-methoxybut-1-en-1-yl)benzene (3s)

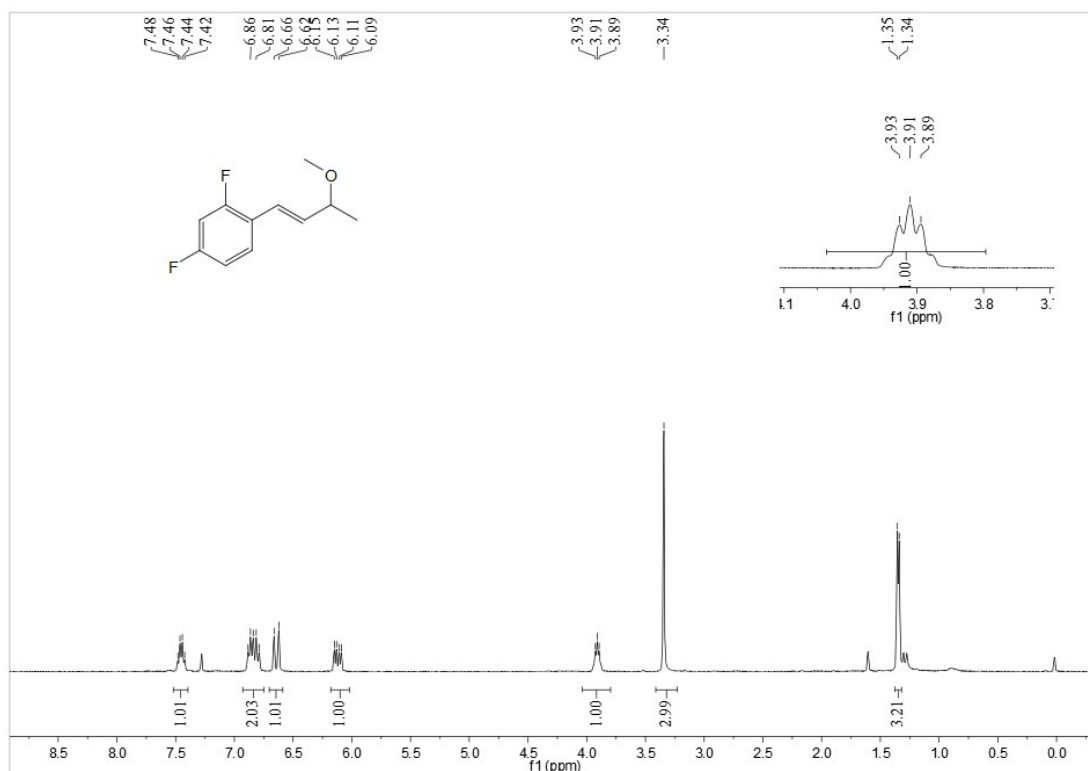

### <sup>13</sup>C NMR for 2,4-difluoro-1-(3-methoxybut-1-en-1-yl)benzene(3s)

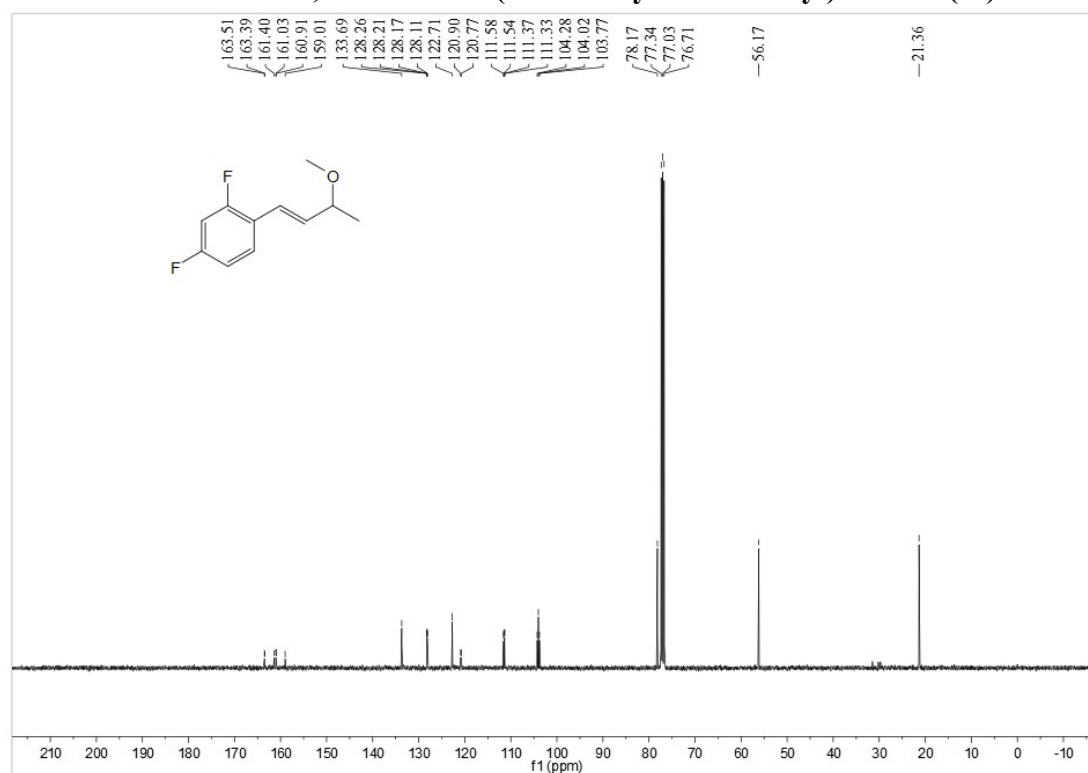

### <sup>1</sup>H NMR for 2-(3-methoxybut-1-en-1-yl)-1,4-dimethylbenzene (3t)

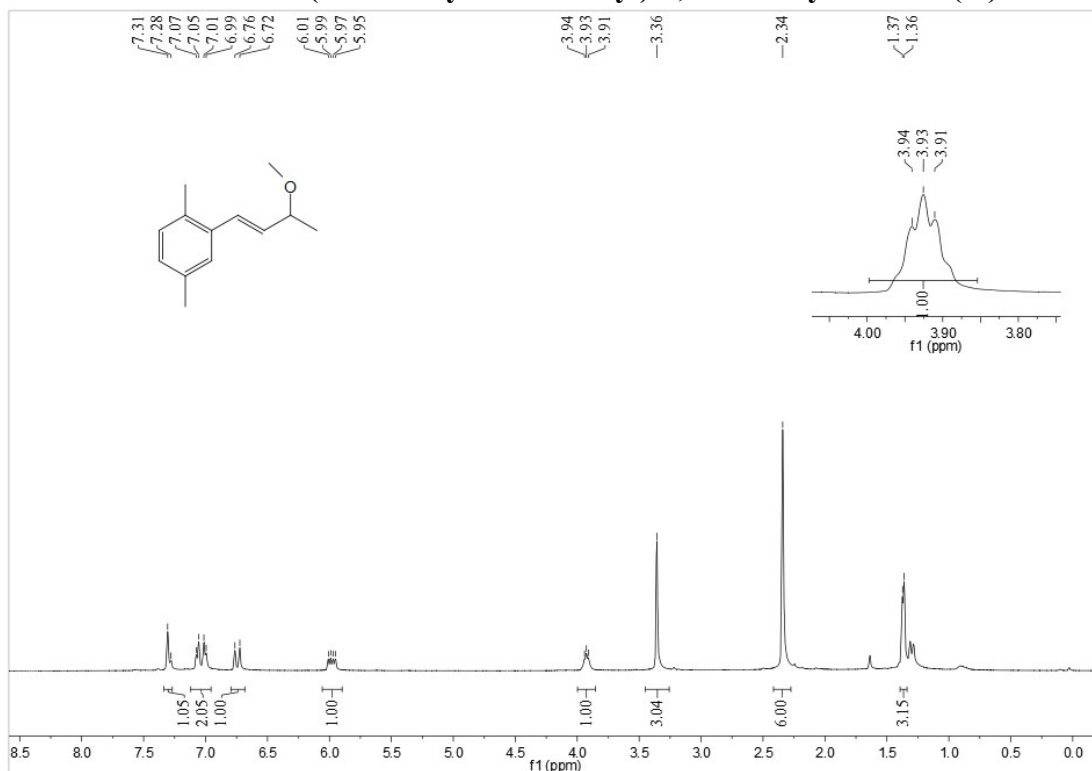

### <sup>13</sup>C NMR for 2-(3-methoxybut-1-en-1-yl)-1,4-dimethylbenzene (3t)

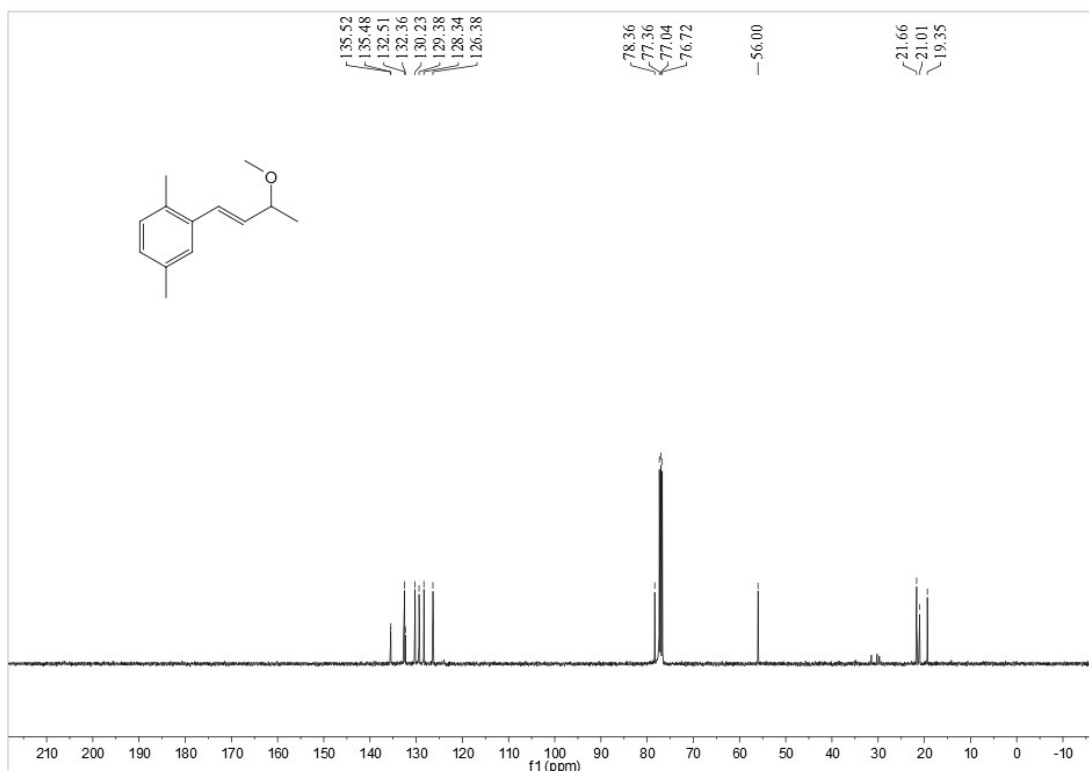

### <sup>1</sup>H NMR for (3-methoxyhex-1-en-1-yl)benzene (3u)

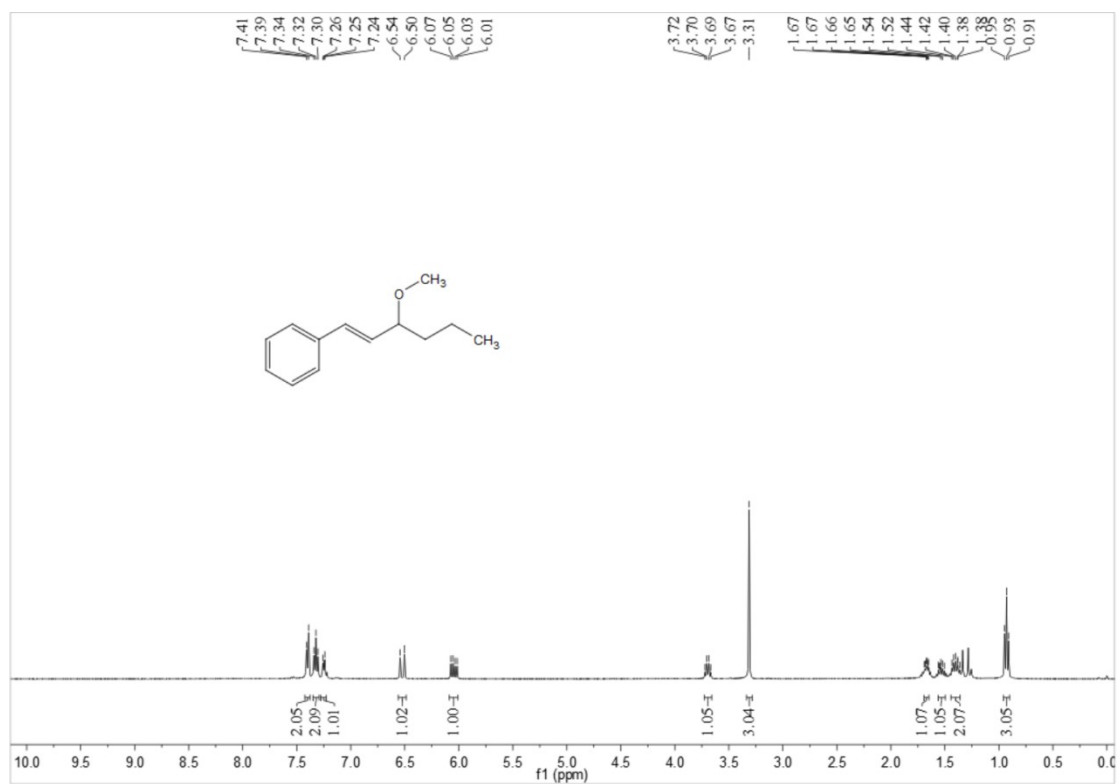

### <sup>13</sup>C NMR for (3-methoxyhex-1-en-1-yl)benzene (3u)

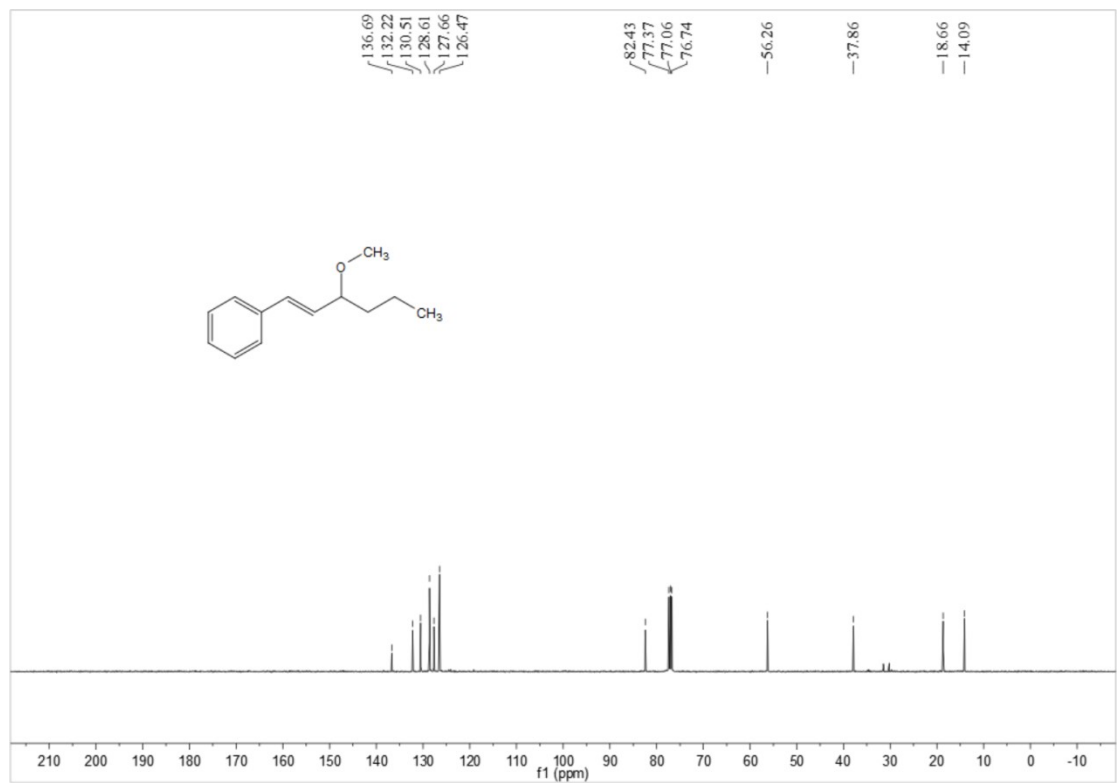

**<sup>1</sup>H NMR for (3-methoxyprop-1-ene-1,3-diyl)dibenzene (3v)**

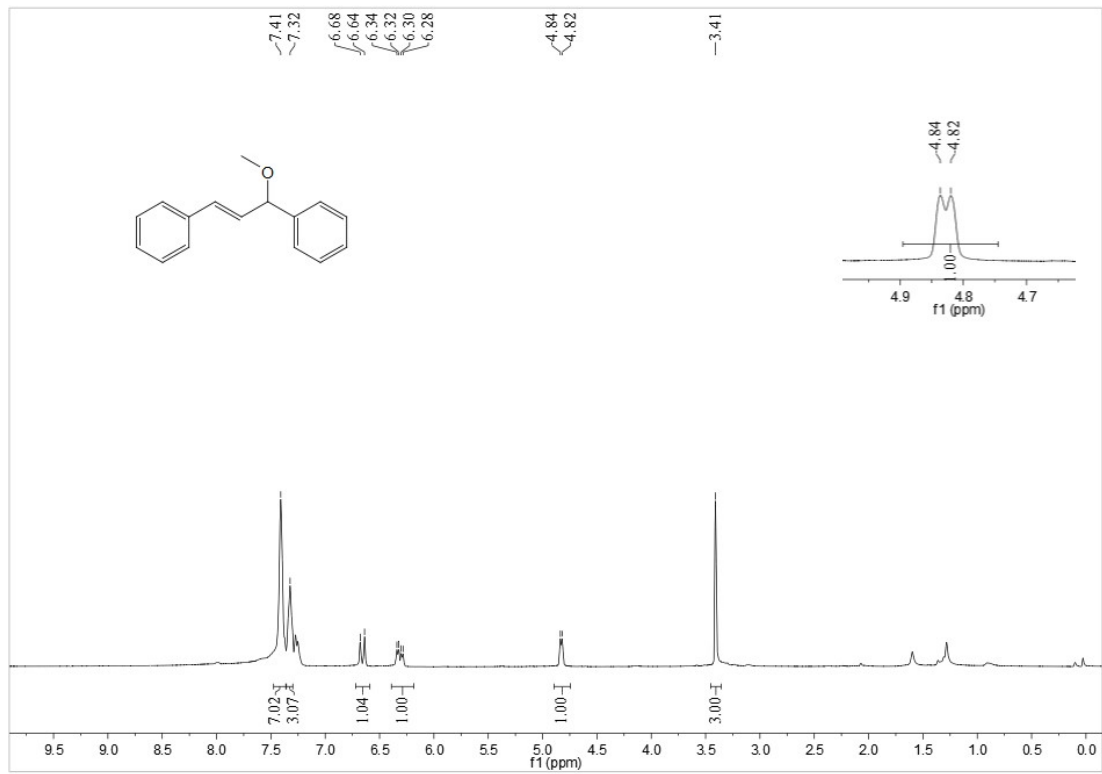

**<sup>13</sup>C NMR for (3-methoxyprop-1-ene-1,3-diyl)dibenzene(3v)**

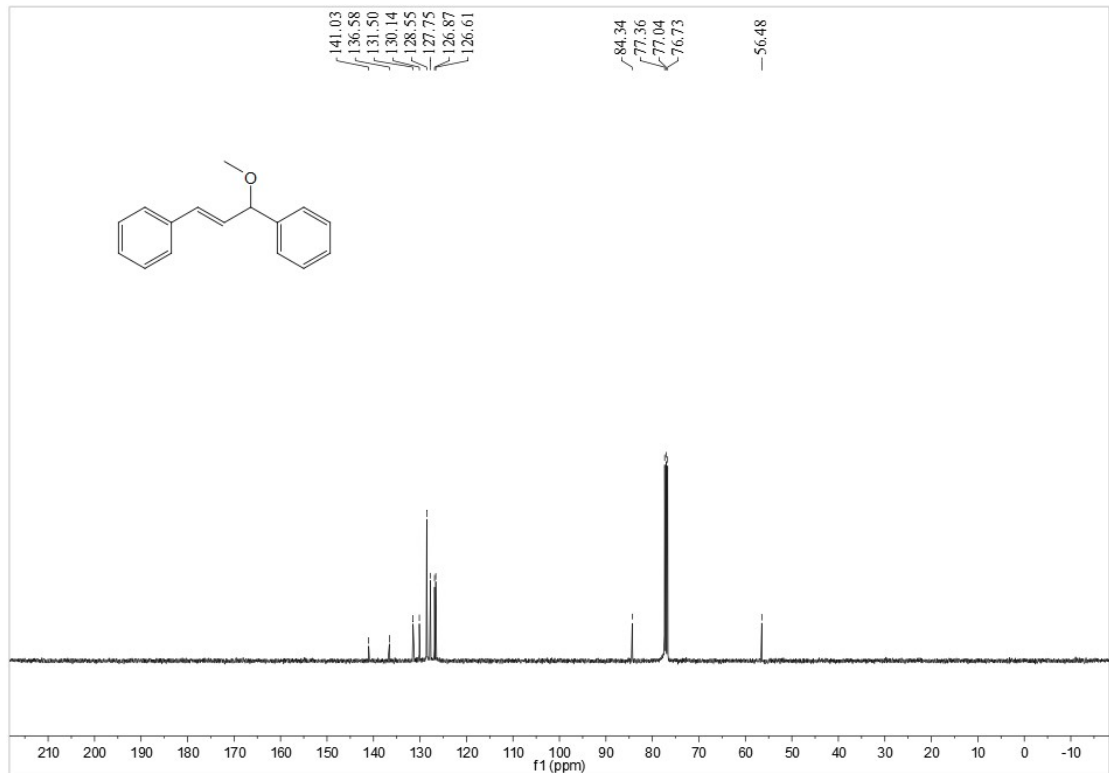

**<sup>1</sup>H NMR for 1,2-difluoro-3-(3-methoxy-3-phenylprop-1-en-1-yl)benzene (3w)**

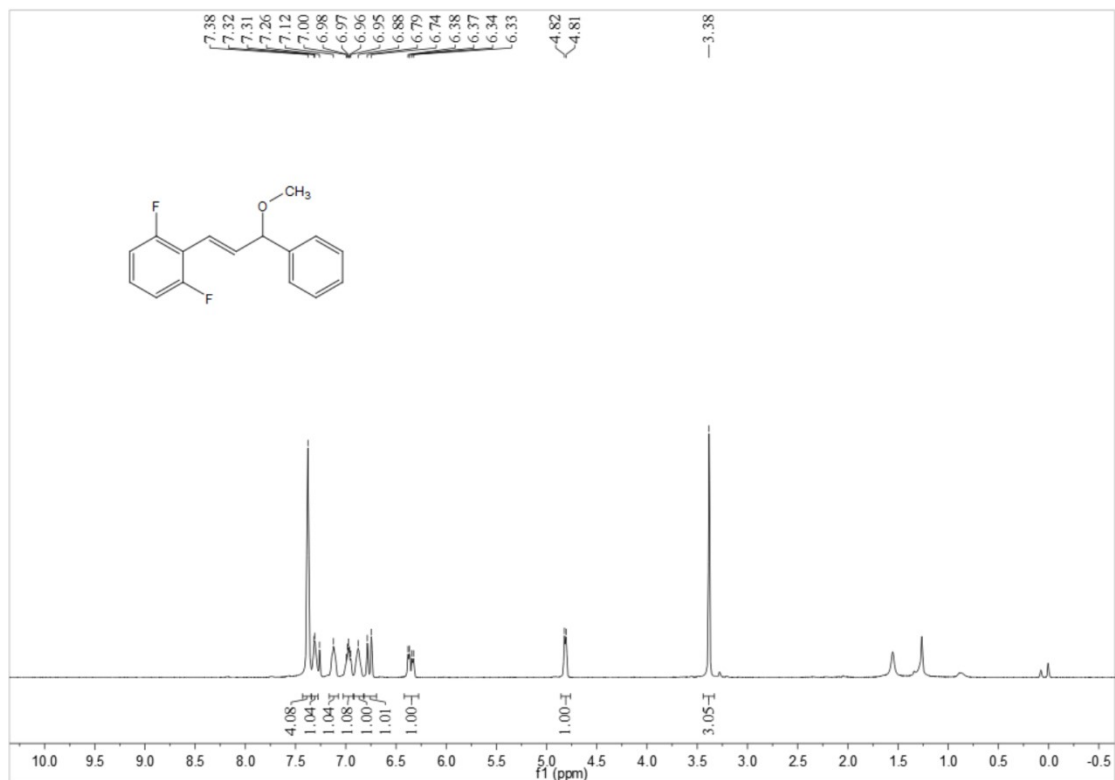

**<sup>13</sup>C NMR for 1,2-difluoro-3-(3-methoxy-3-phenylprop-1-en-1-yl)benzene (3w)**

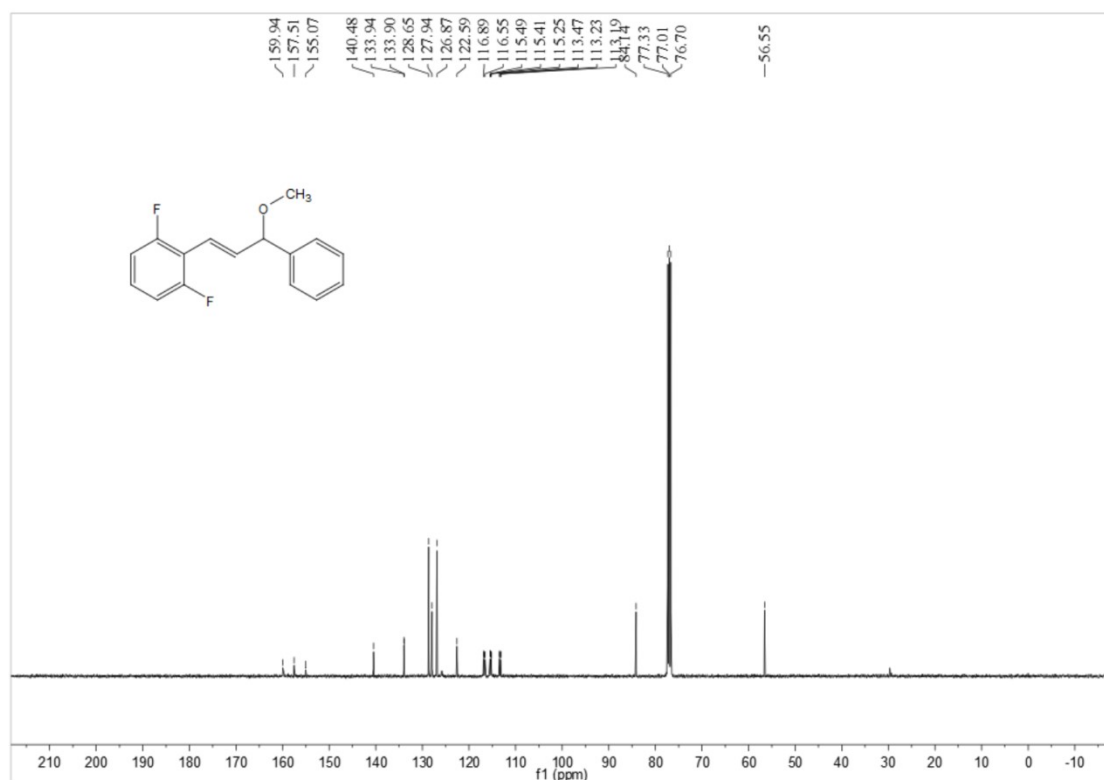



**<sup>1</sup>H NMR for 1-bromo-2-(3-methoxy-3-phenylprop-1-en-1-yl)benzene (3x)**

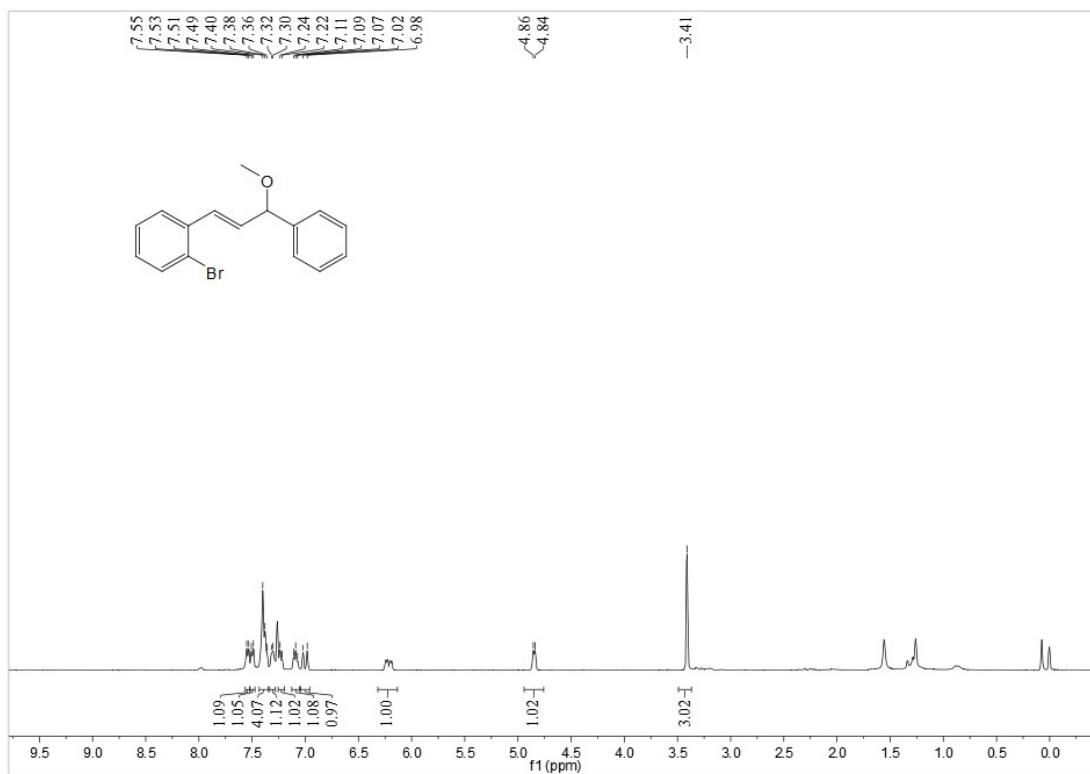

**<sup>13</sup>C NMR for 1-bromo-2-(3-methoxy-3-phenylprop-1-en-1-yl)benzene (3x)**

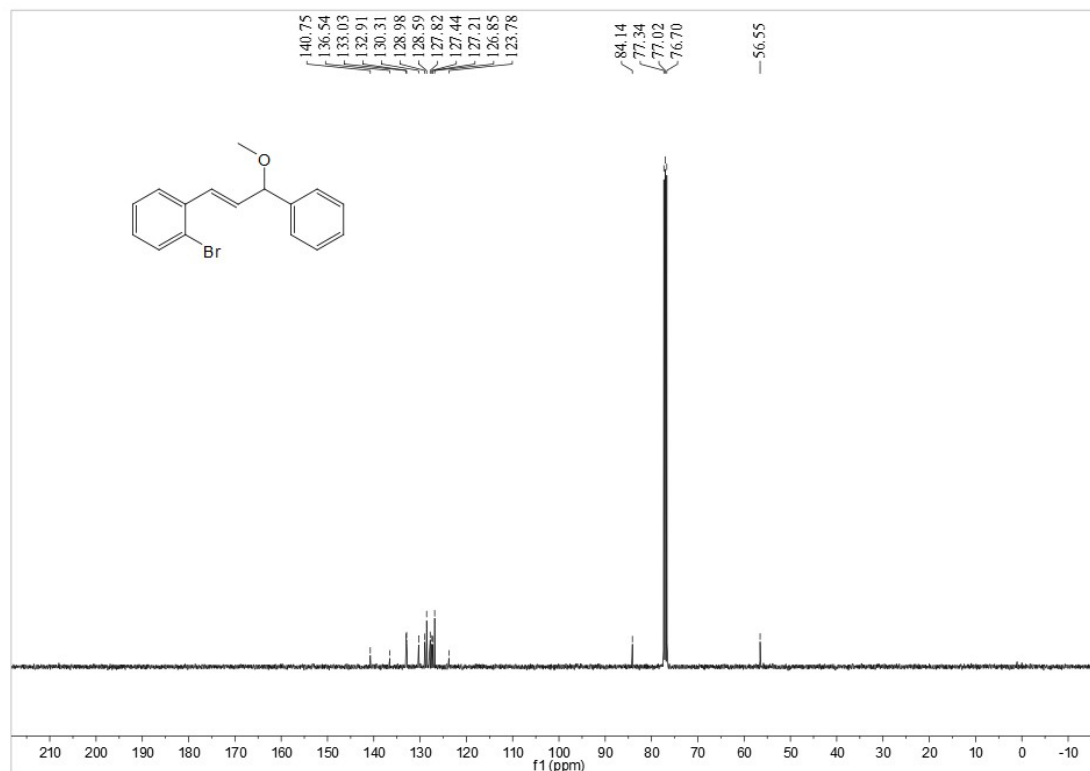



### <sup>1</sup>H NMR spectra of (3-methoxyprop-1-en-1-yl)benzene(3aa)

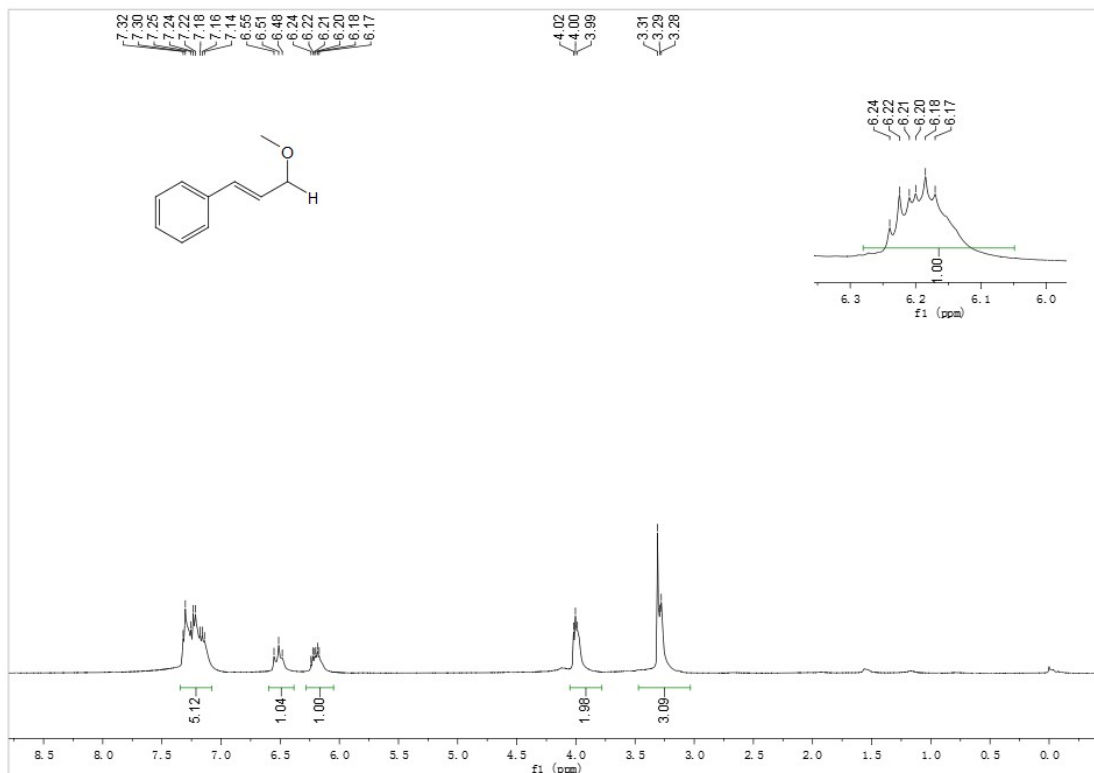

### <sup>13</sup>C NMR spectra of (3-methoxyprop-1-en-1-yl)benzene(3aa)

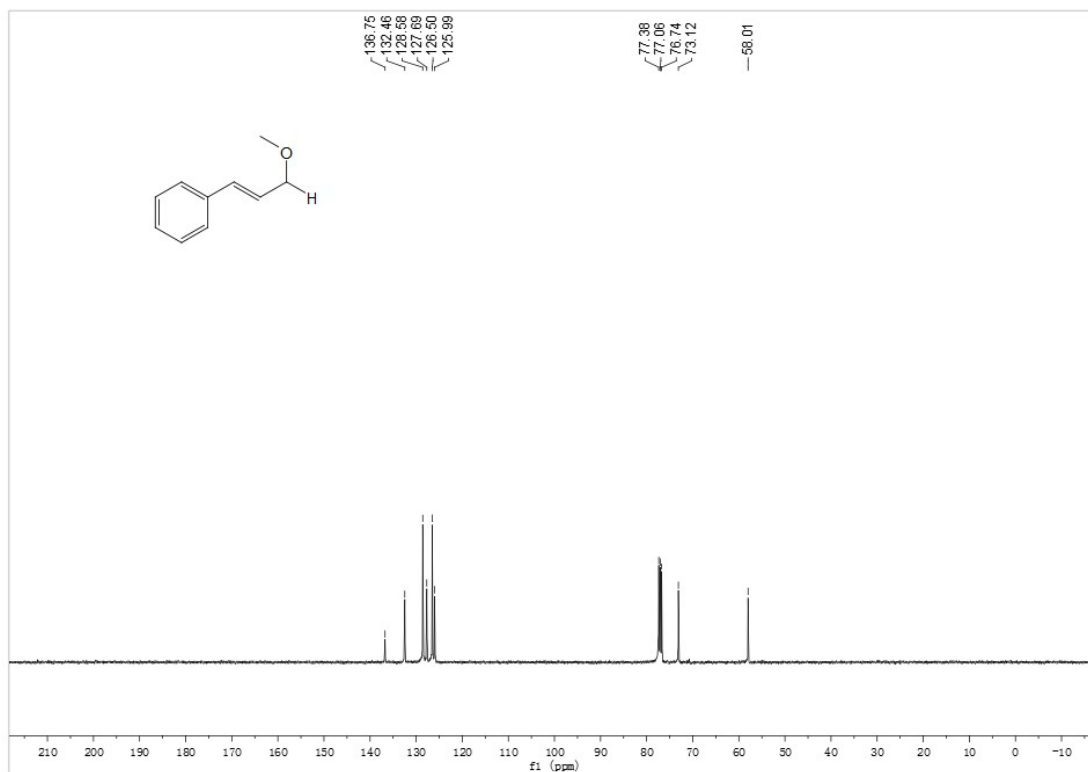

### <sup>1</sup>H NMR spectra of (3-ethoxyprop-1-en-1-yl)benzene(3ab)

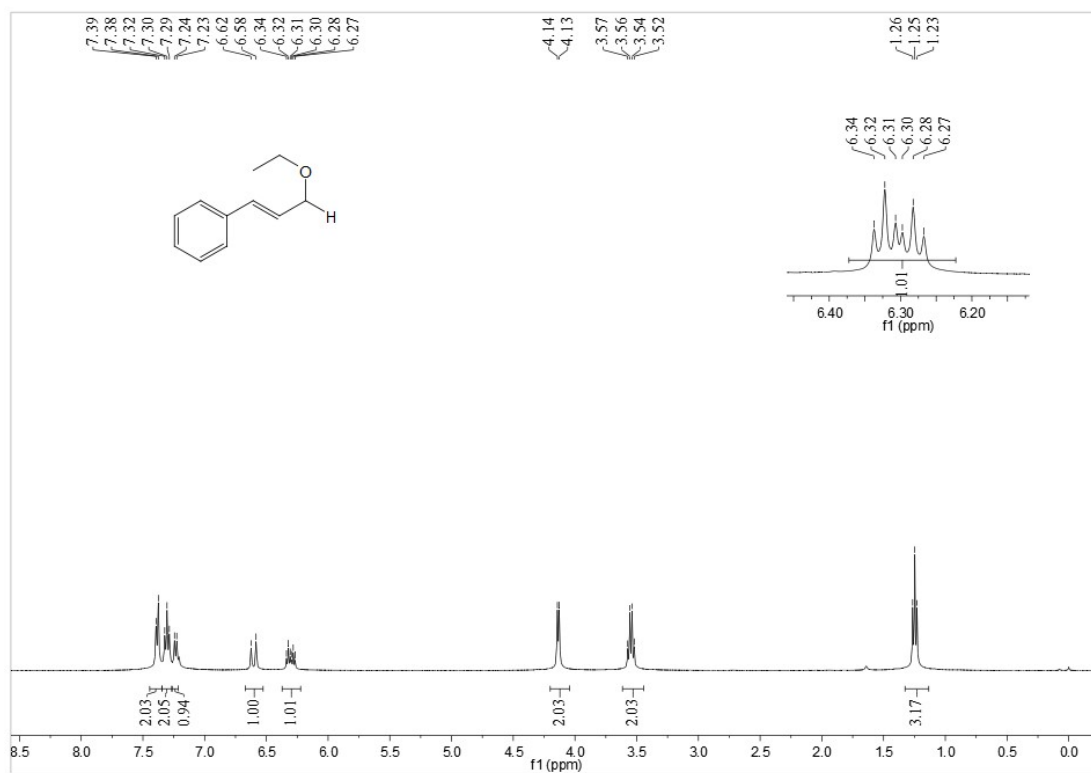

### <sup>13</sup>C NMR spectra of (3-ethoxyprop-1-en-1-yl)benzene(3ab)

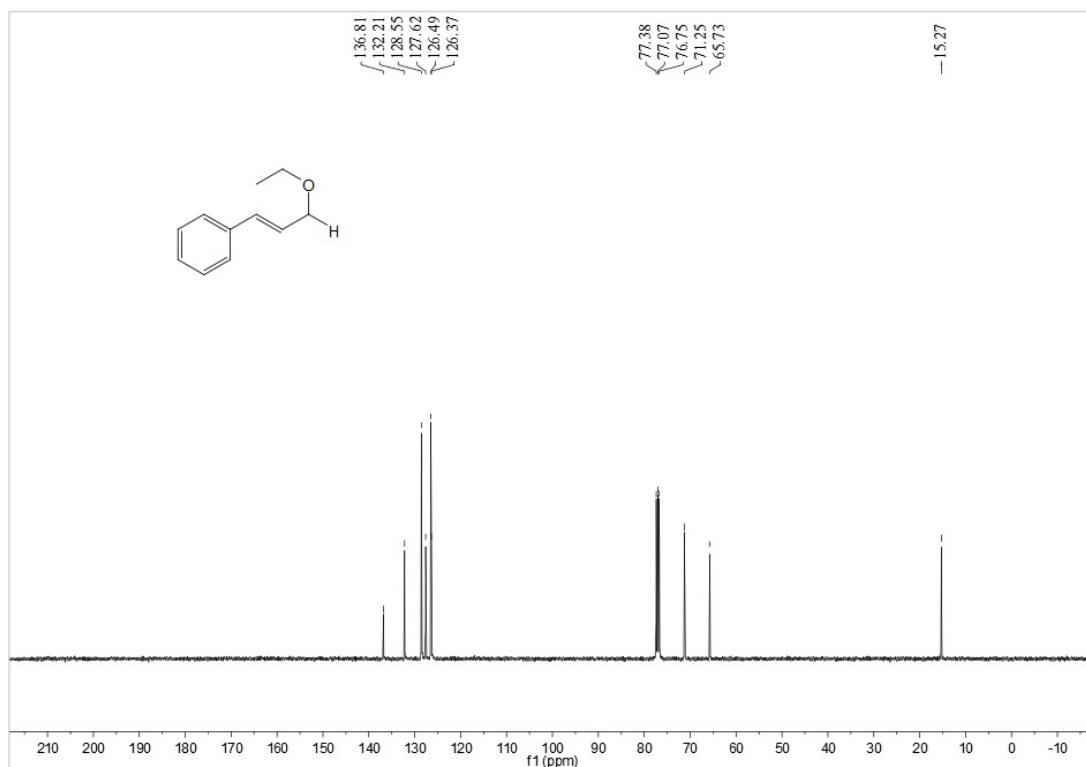

### <sup>1</sup>H NMR spectra of (3-butoxyprop-1-en-1-yl)benzene(3ac)

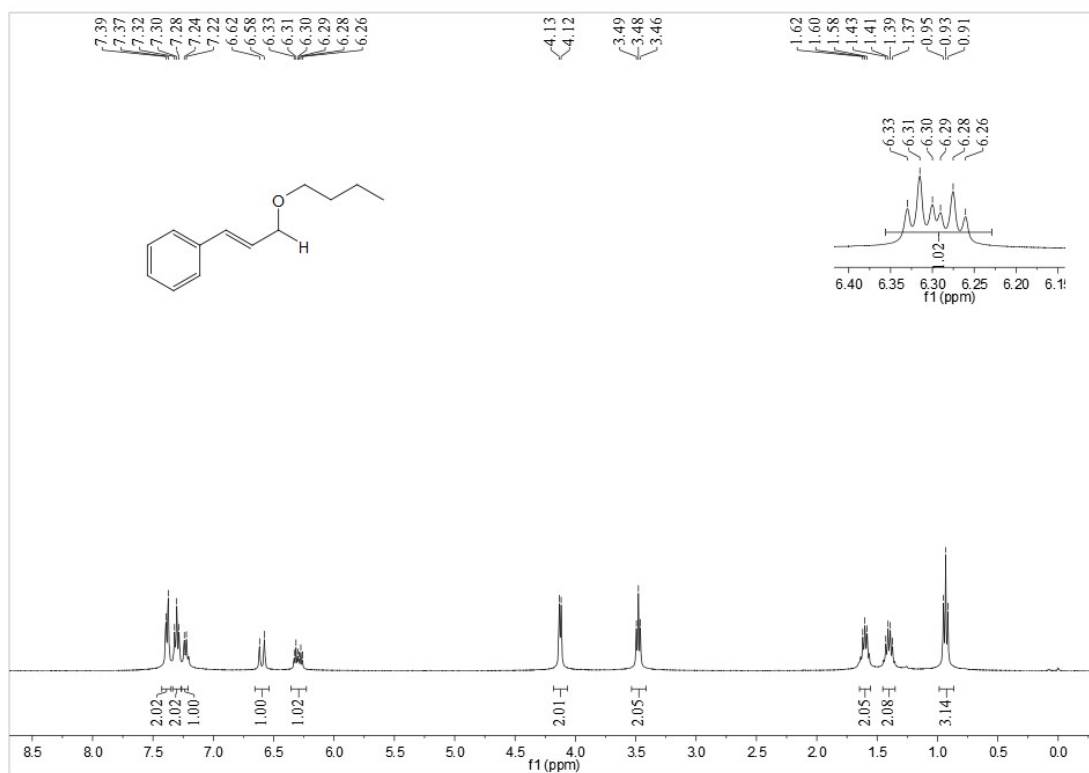

### <sup>13</sup>C NMR spectra of (3-butoxyprop-1-en-1-yl)benzene(3ac)

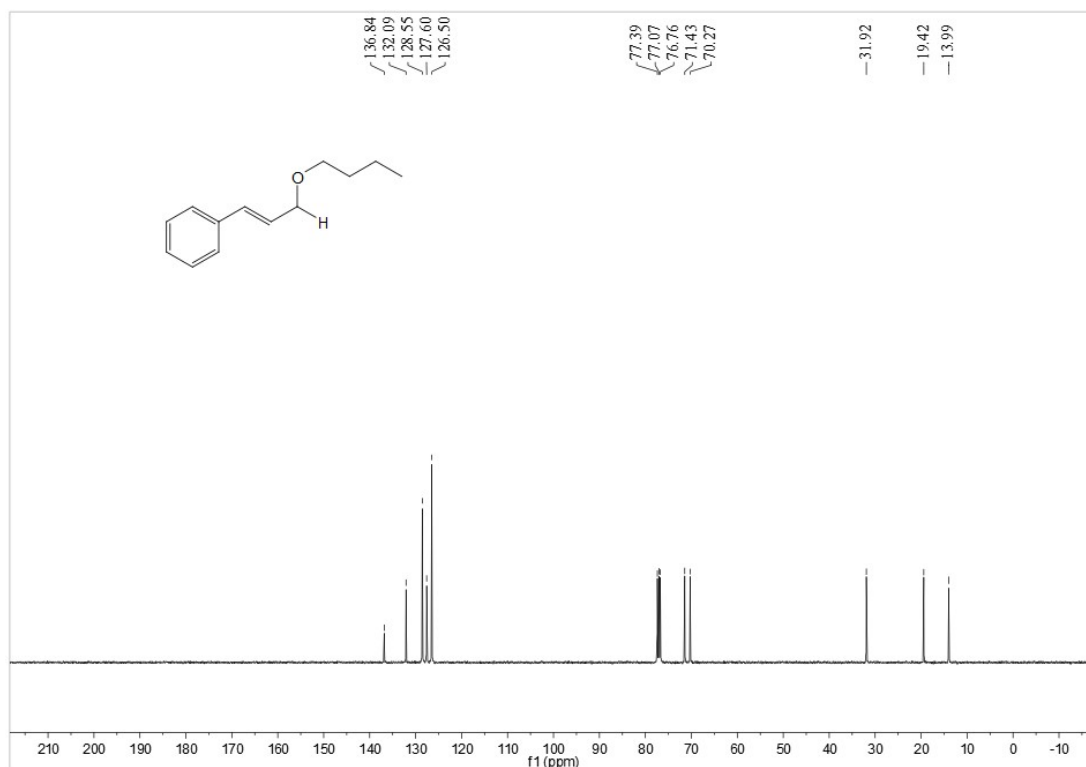

### <sup>1</sup>H NMR spectra of (3-(pentyloxy)prop-1-en-1-yl)benzene(3ad)

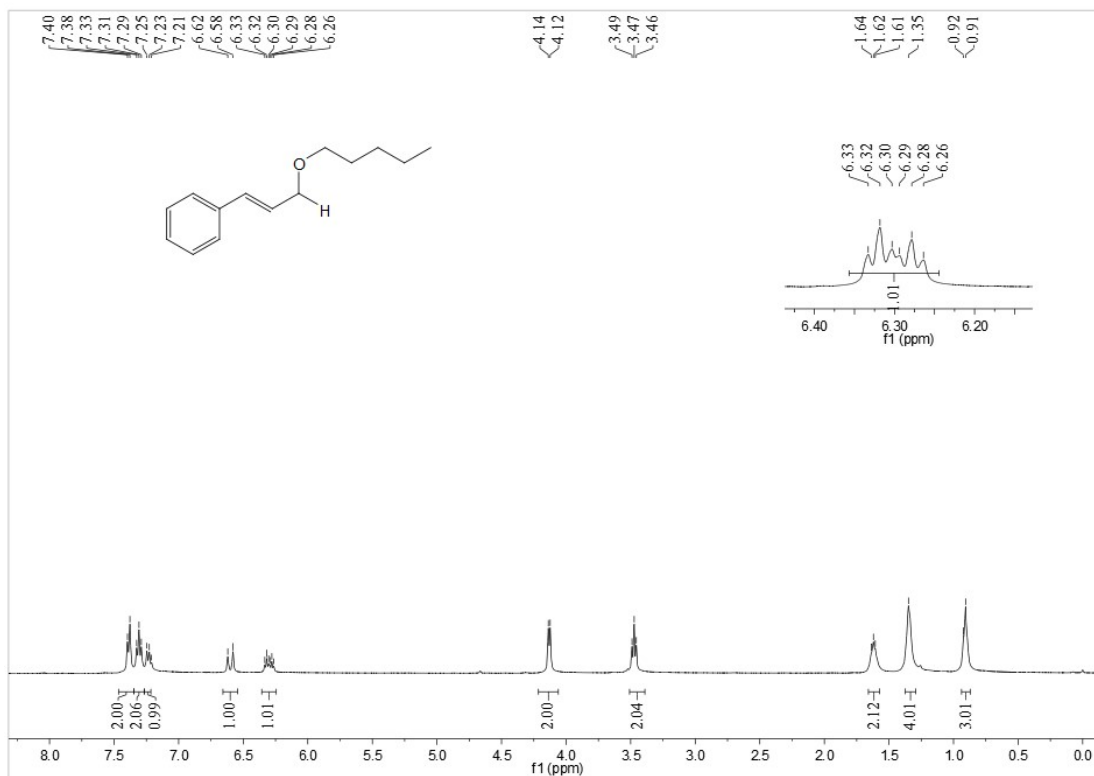

### <sup>13</sup>C NMR spectra of (3-(pentyloxy)prop-1-en-1-yl)benzene(3ad)

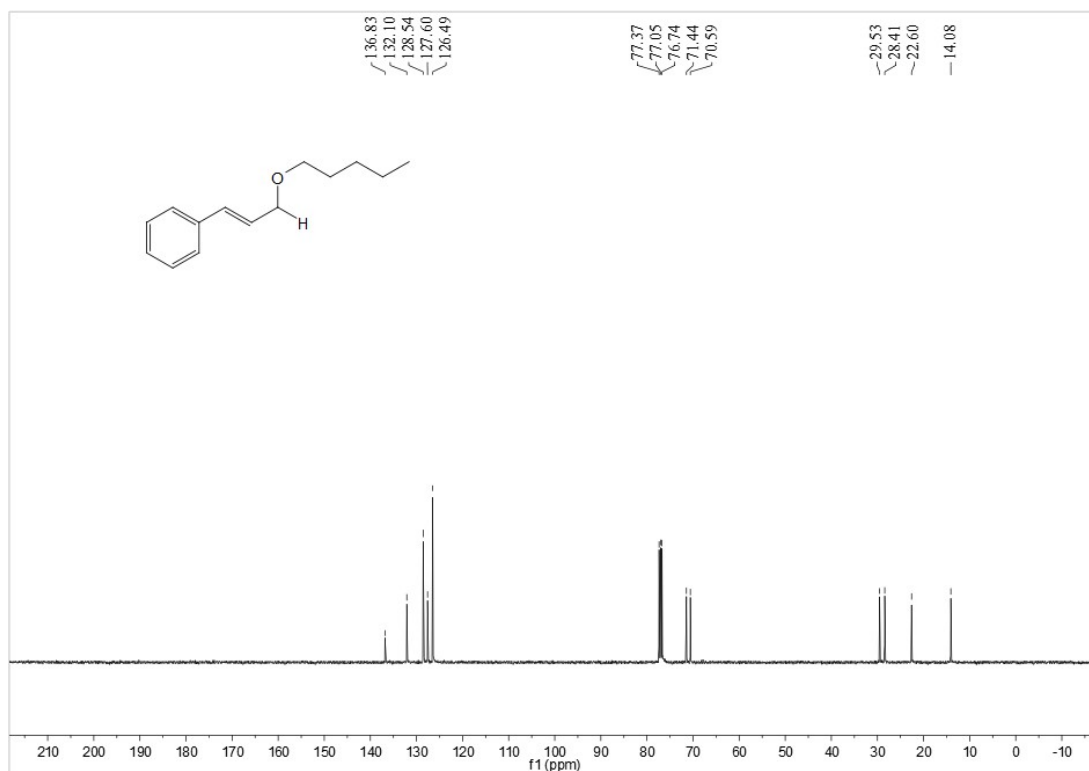

### <sup>1</sup>H NMR spectra of 1-(3-methoxyprop-1-en-1-yl)-4-methylbenzene(3ae)

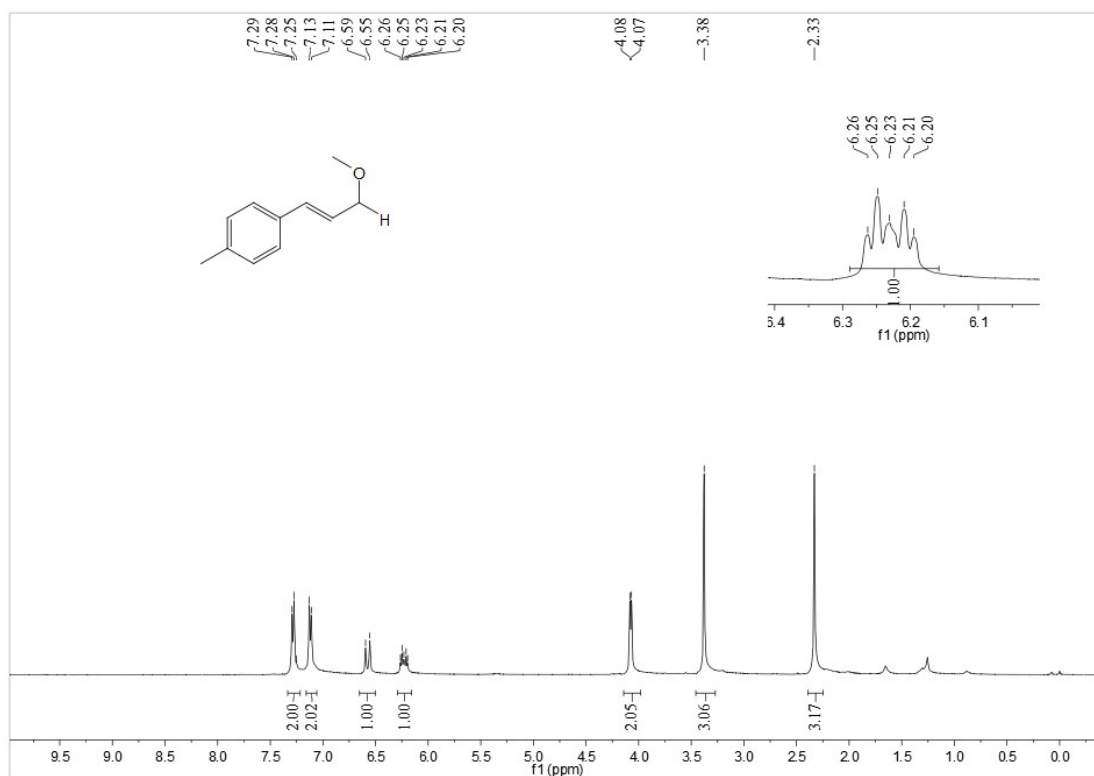

### <sup>13</sup>C NMR spectra of 1-(3-methoxyprop-1-en-1-yl)-4-methylbenzene(3ae)

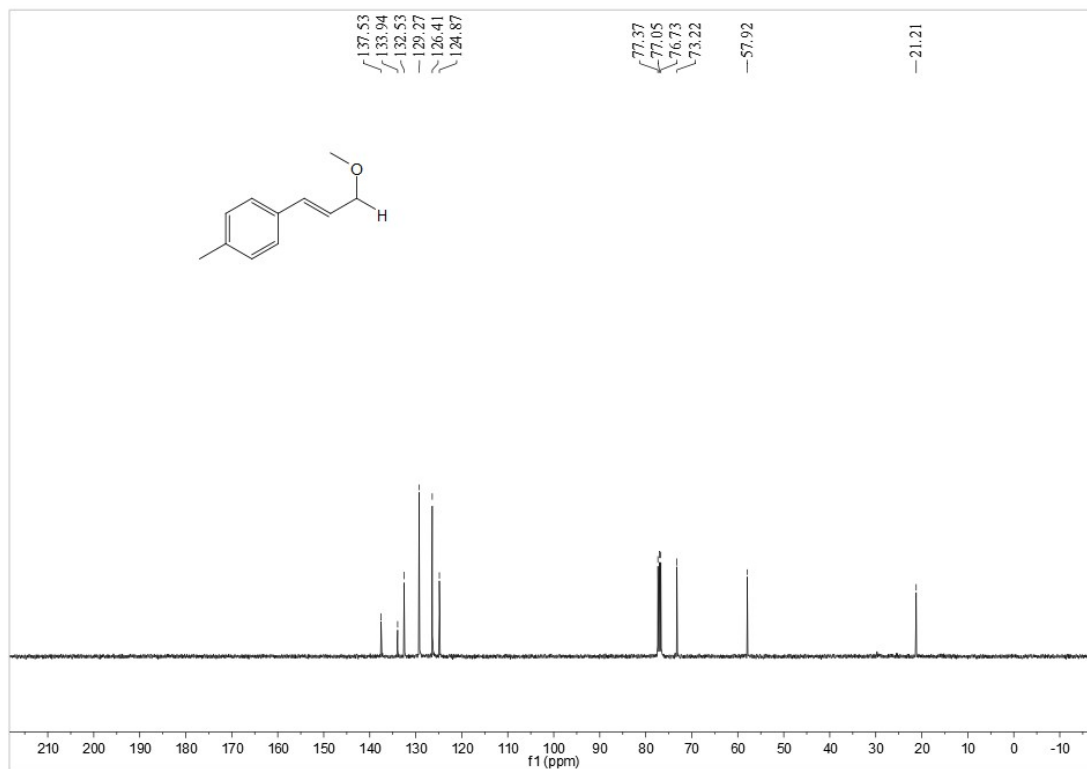

### <sup>1</sup>H NMR spectra of 1-fluoro-4-(3-methoxyprop-1-en-1-yl)benzene(3af)

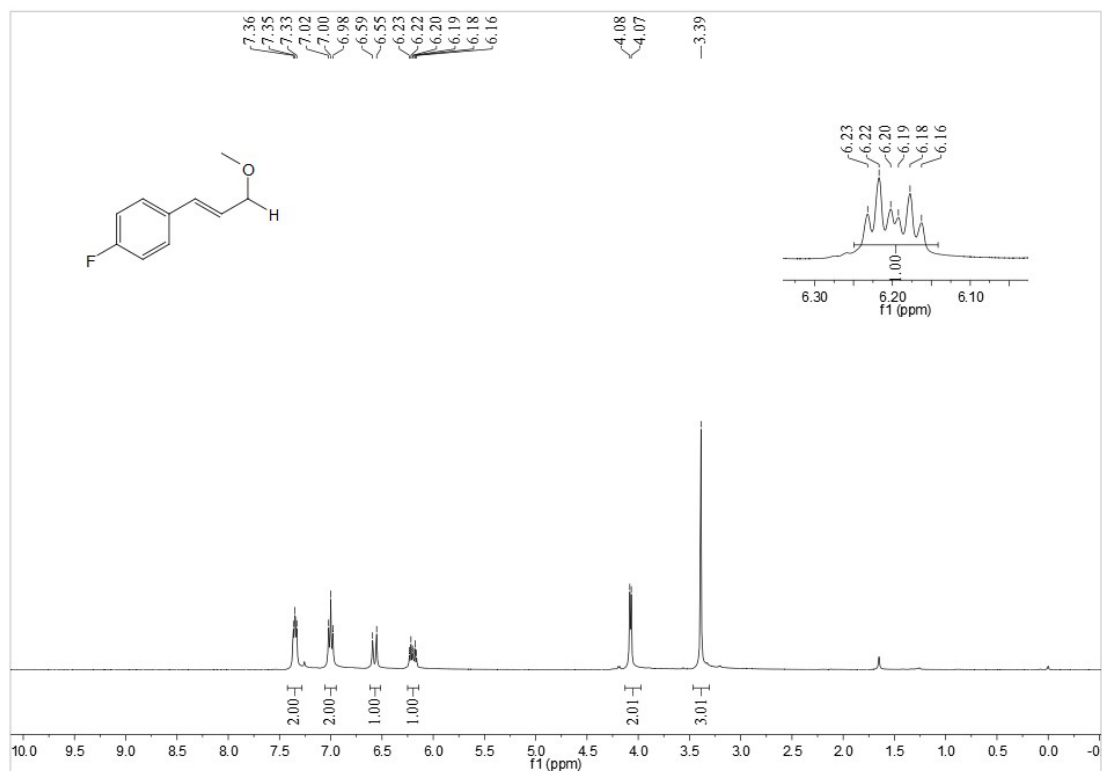

### <sup>13</sup>C NMR spectra of 1-fluoro-4-(3-methoxyprop-1-en-1-yl)benzene(3af)

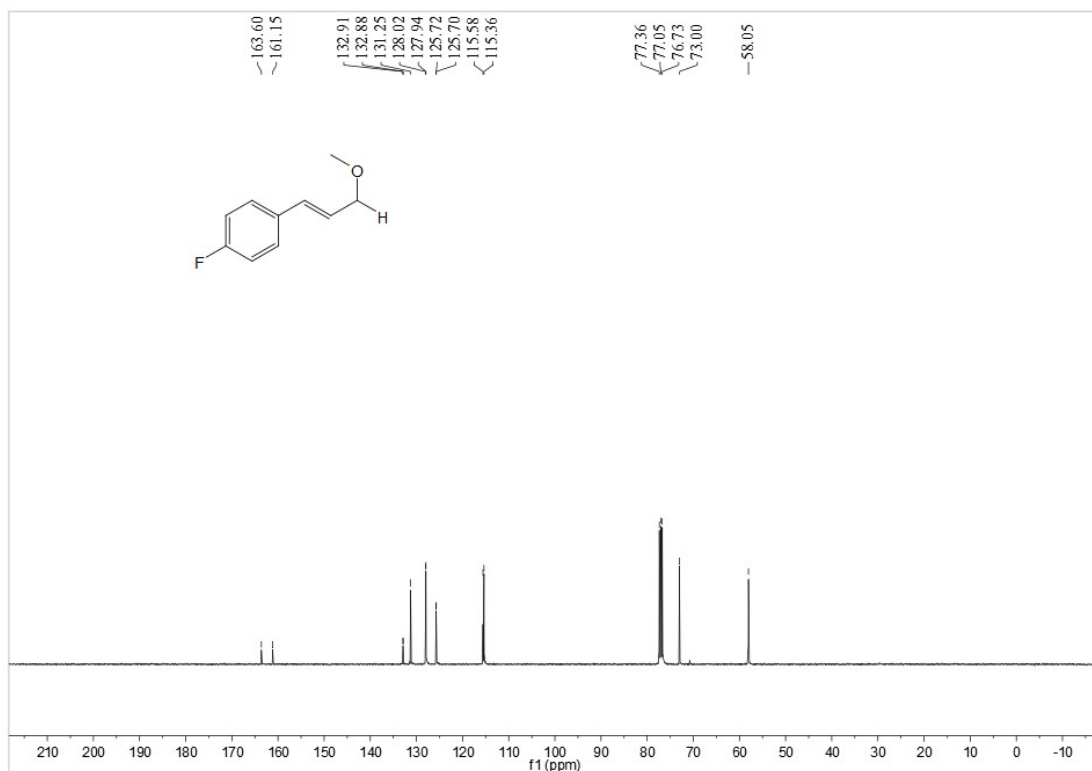



### <sup>1</sup>H NMR spectra of (3-methoxy-2-methylprop-1-en-1-yl)benzene(3ag)

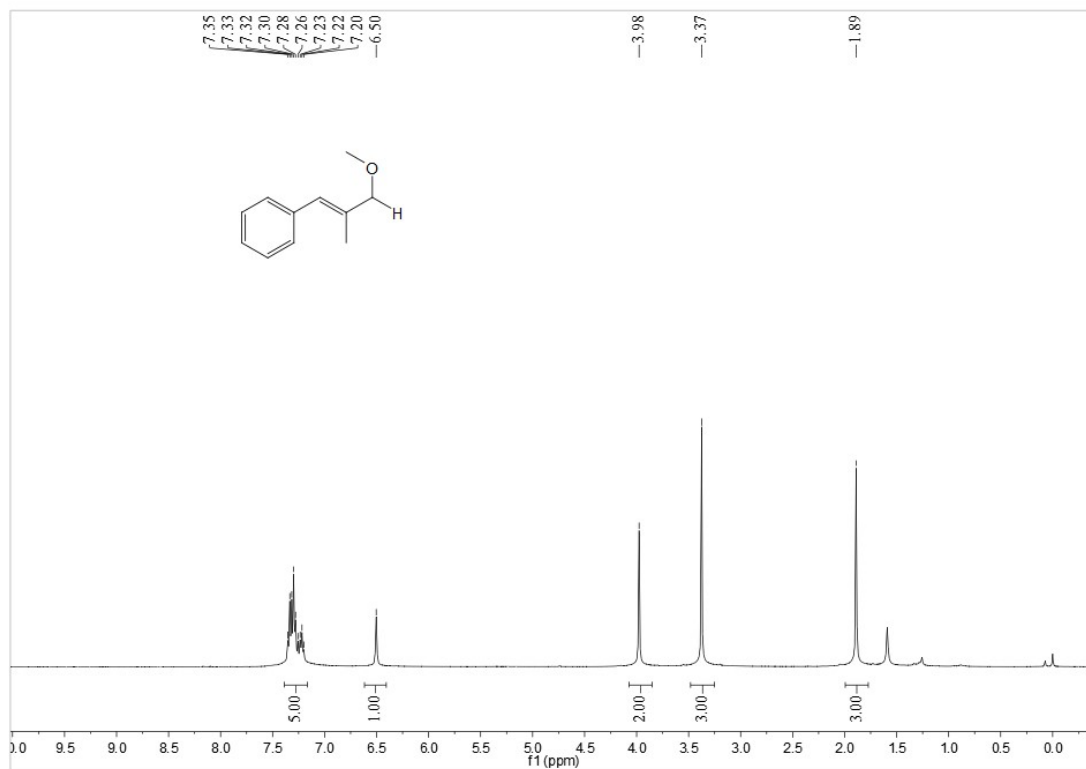

### <sup>13</sup>C NMR spectra of (3-methoxy-2-methylprop-1-en-1-yl)benzene(3ag)

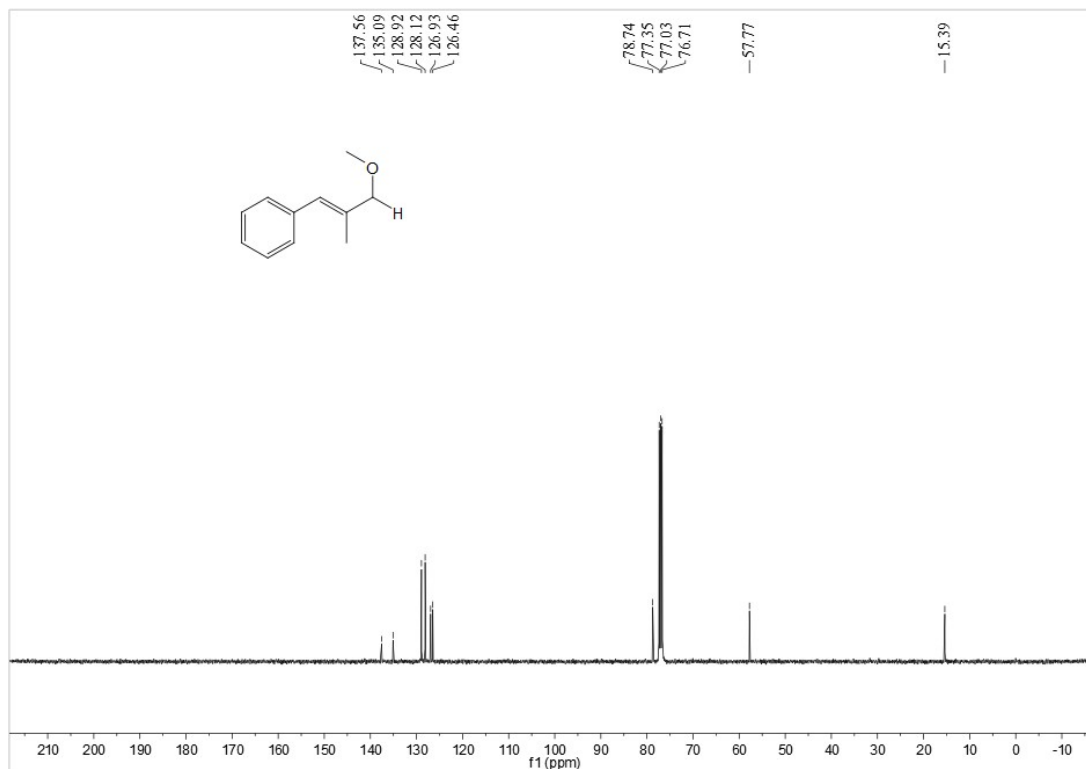

### <sup>1</sup>H NMR spectra of (3-(2-methylbutoxy)prop-1-en-1-yl)benzene(3ah)

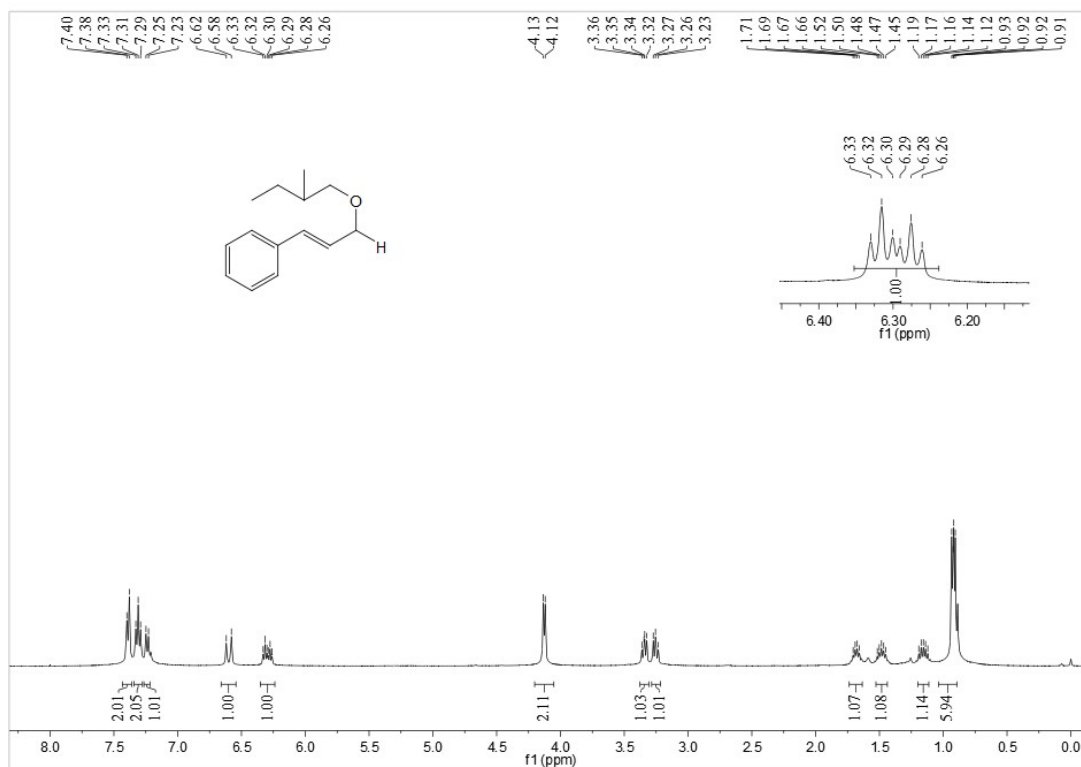

### <sup>13</sup>C NMR spectra of (3-(2-methylbutoxy)prop-1-en-1-yl)benzene(3ah)

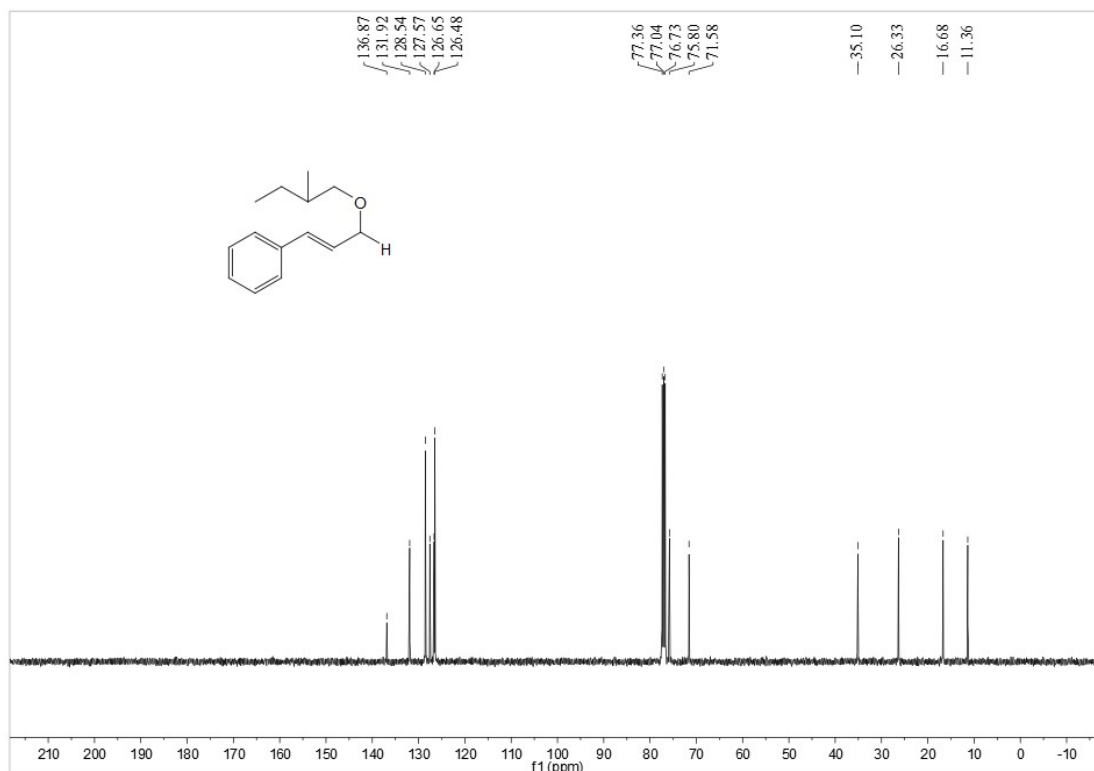

### <sup>1</sup>H NMR spectra of 2-(3-methoxybut-1-en-1-yl)naphthalene(3ai)

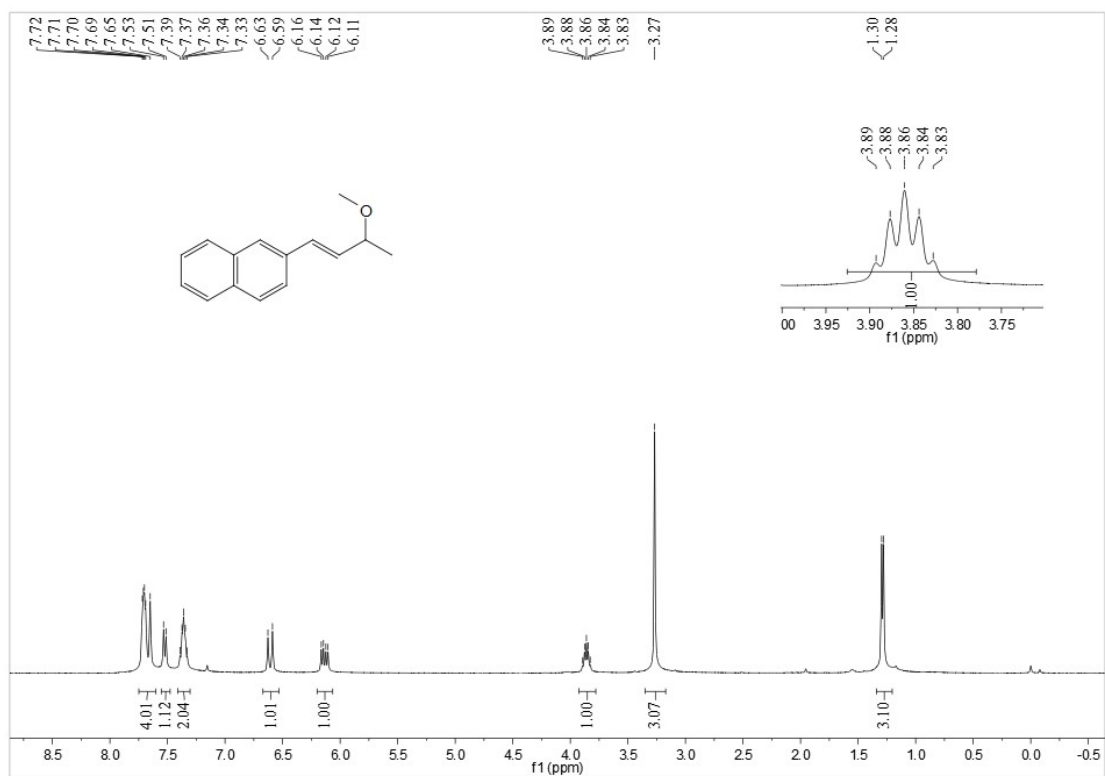

### <sup>13</sup>C NMR spectra of 2-(3-methoxybut-1-en-1-yl)naphthalene (3ai)

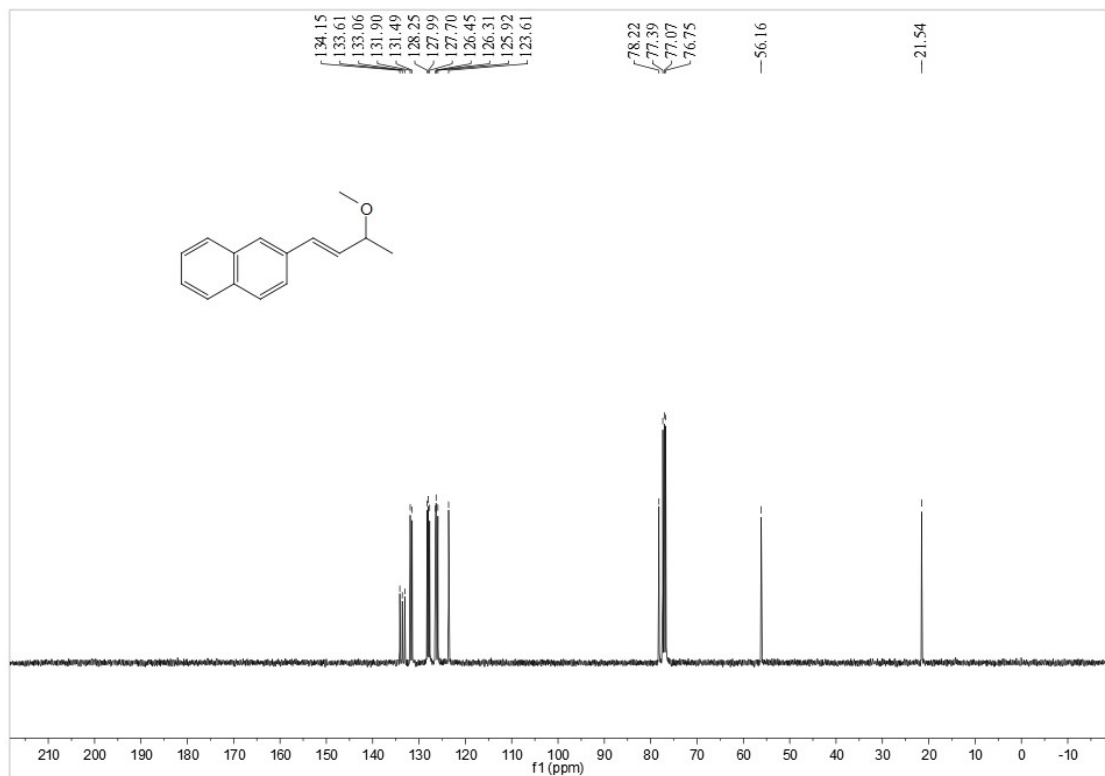

**<sup>1</sup>H NMR spectra of (*E*)-(3-isopropoxyprop-1-en-1-yl)benzene (3aj)**

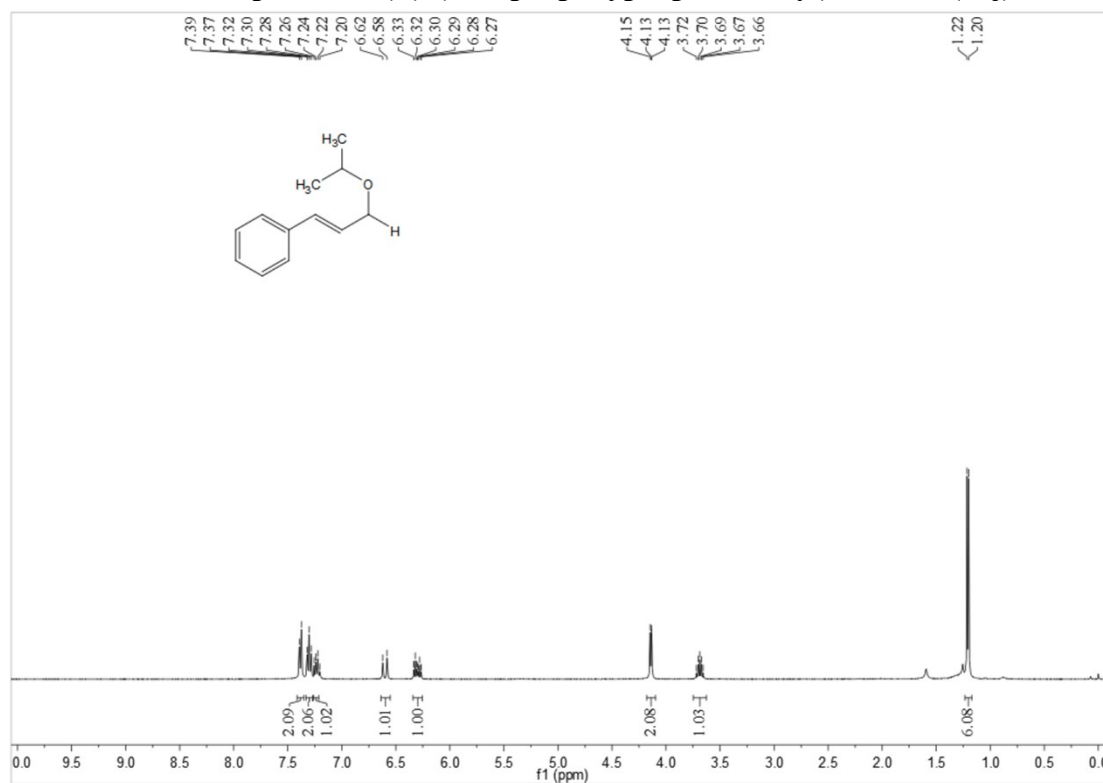

**<sup>13</sup>C NMR spectra of (*E*)-(3-isopropoxyprop-1-en-1-yl)benzene (3aj)**

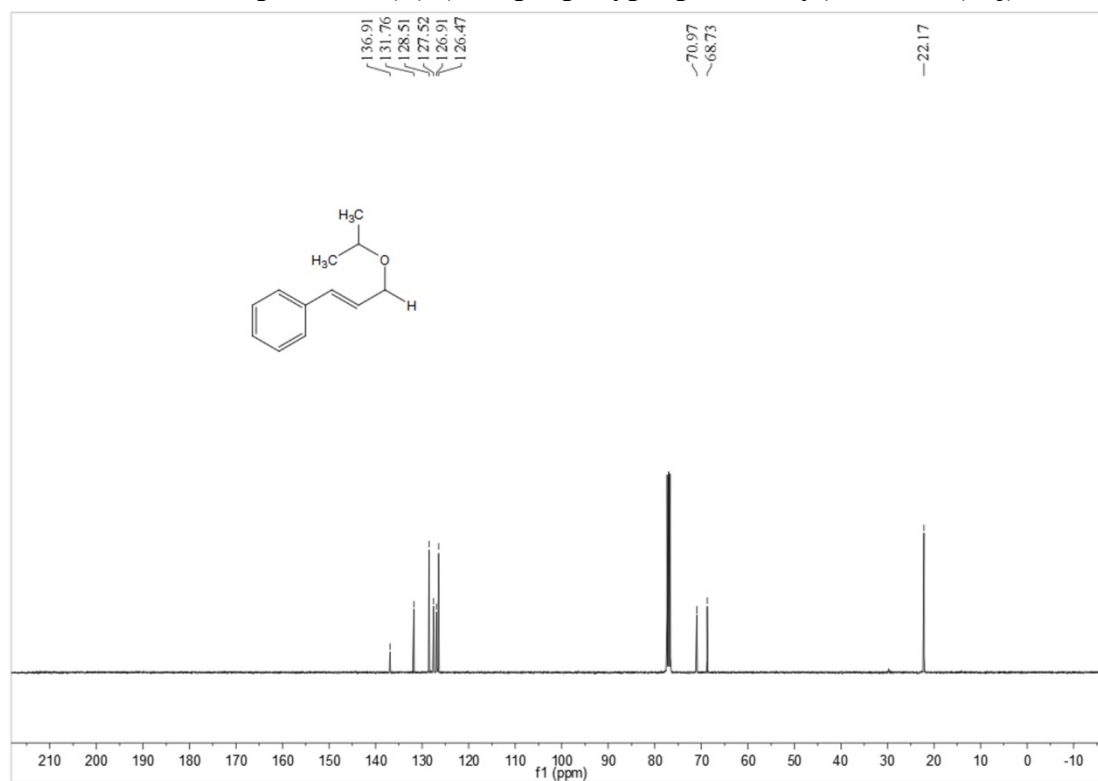

### <sup>1</sup>H NMR spectra of 4-phenylbutan-2-ol(4a)

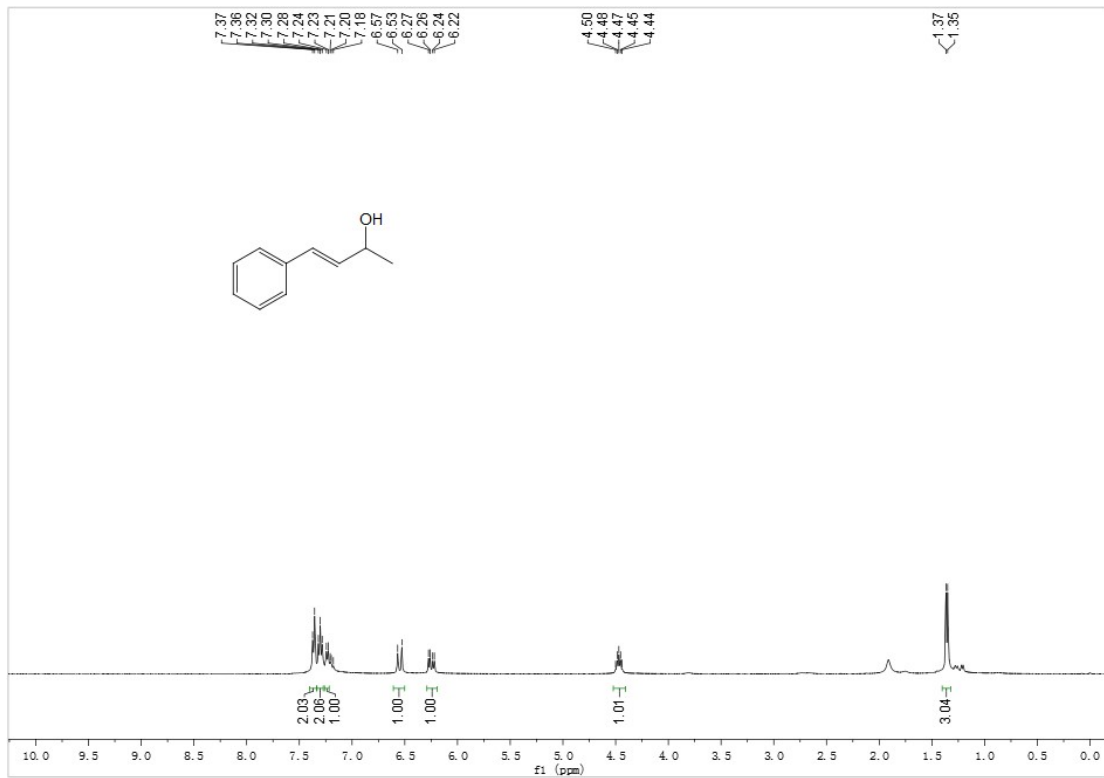

### <sup>13</sup>C NMR spectra of 4-phenylbutan-2-ol(4a)

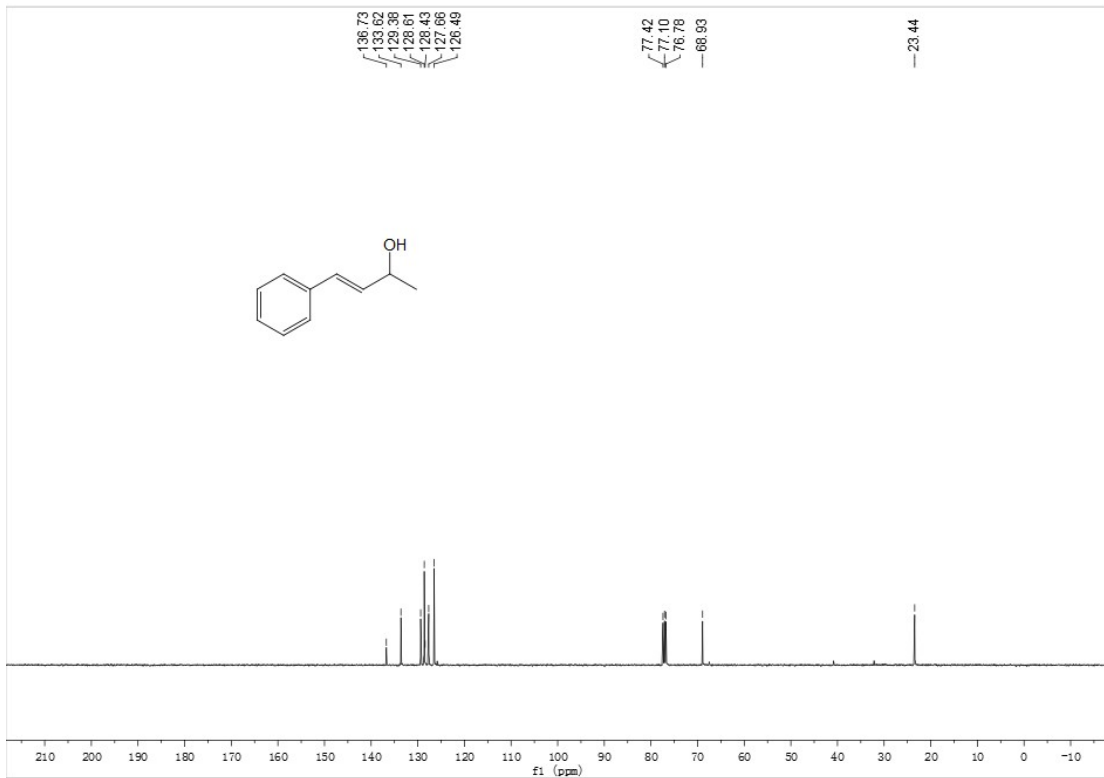

**<sup>1</sup>H NMR spectra of (8*S*,9*S*,10*R*,13*S*,14*S*)-10,13-dimethyl-2,3,6,7,8,9,10,11,12,13,14,15,16,17-tetradecahydro-1H-cyclopenta[*a*]phenanthren-3-ol(4y)**

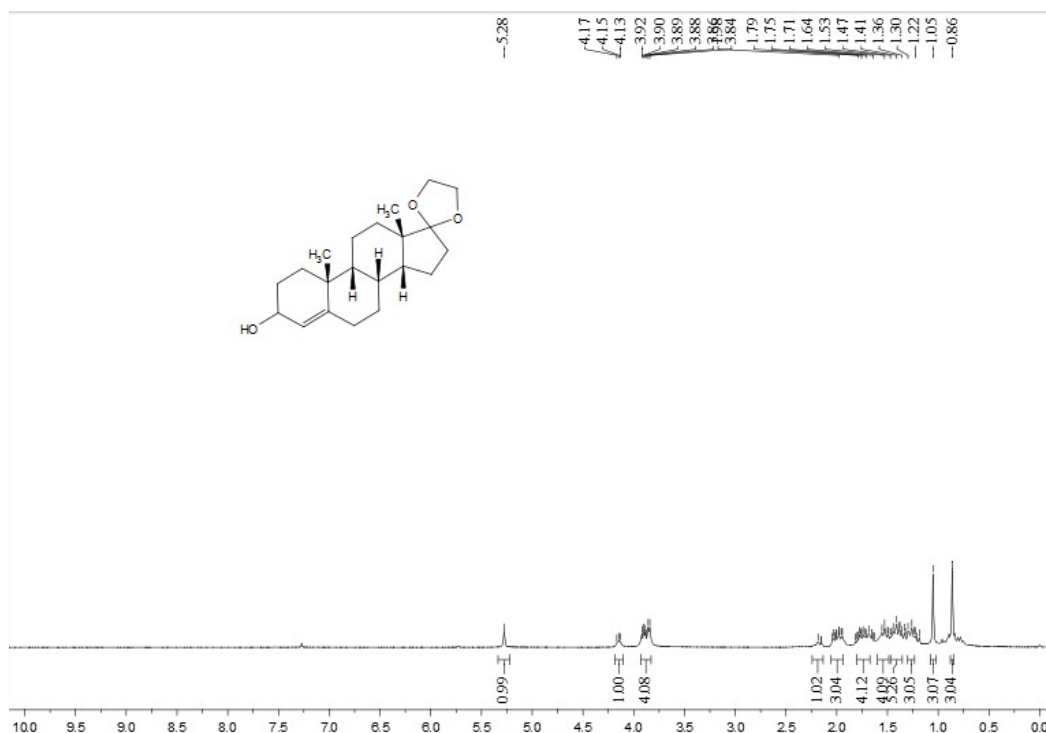

**<sup>13</sup>C NMR spectra of (8*S*,9*S*,10*R*,13*S*,14*S*)-10,13-dimethyl-2,3,6,7,8,9,10,11,12,13,14,15,16,17-tetradecahydro-1H-cyclopenta[*a*]phenanthren-3-ol(4y)**

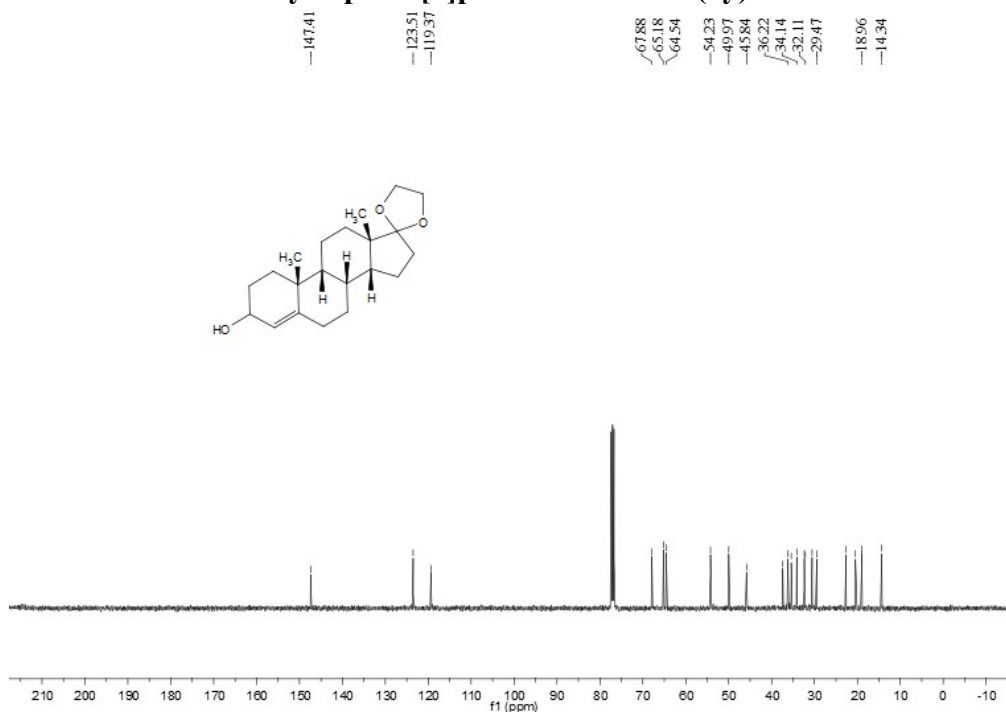

### <sup>1</sup>H NMR for 1,3-diphenylpropan-1-one (5v)

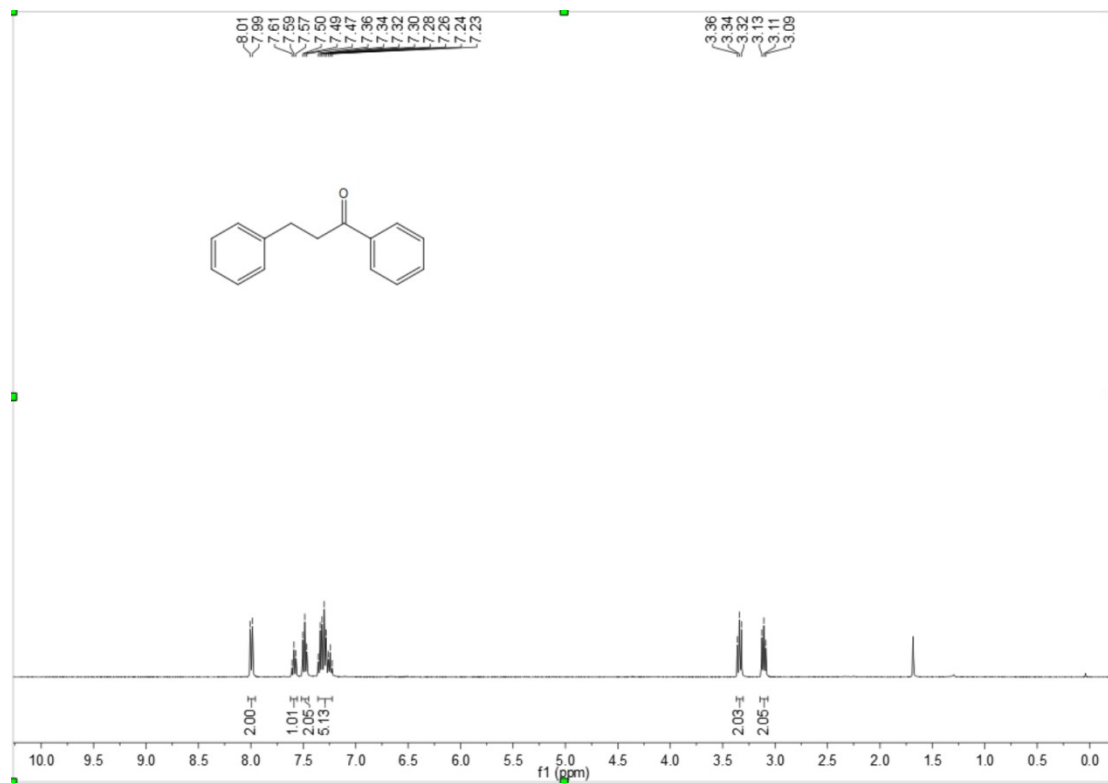

### <sup>13</sup>C NMR for 1,3-diphenylpropan-1-one (5v)

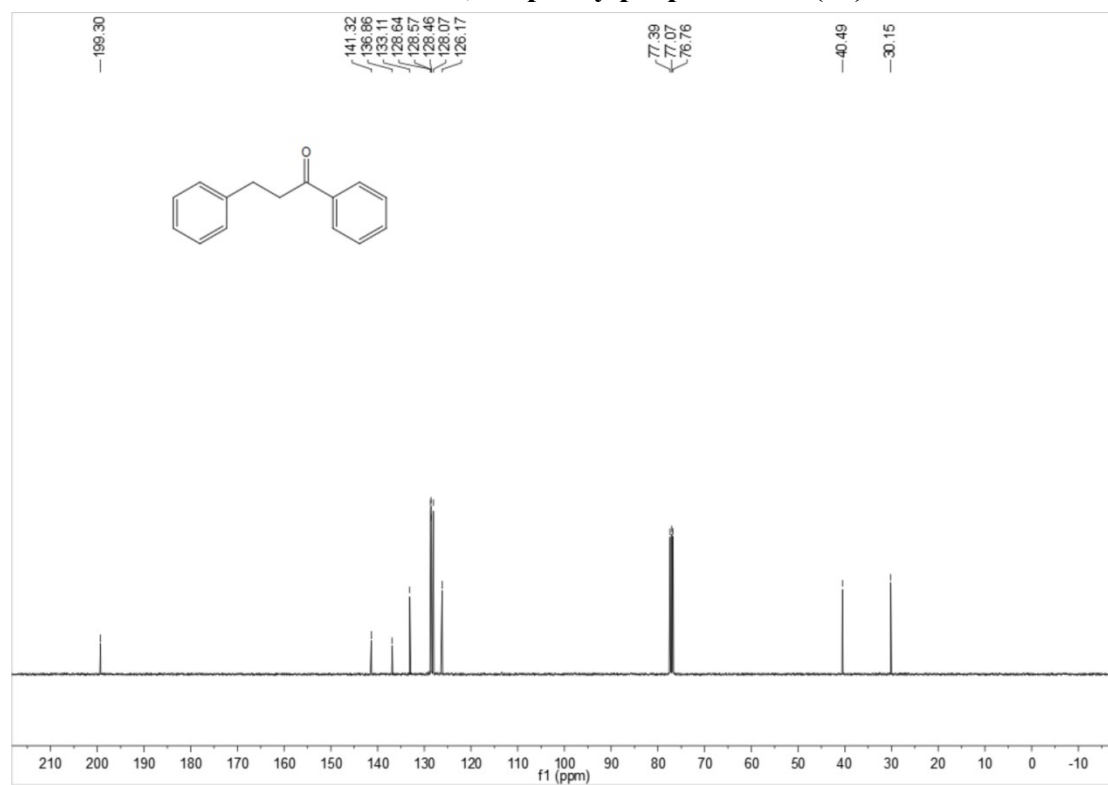

### <sup>1</sup>H NMR for 3-(2,3-difluorophenyl)-1-phenylpropan-1-one (5w)

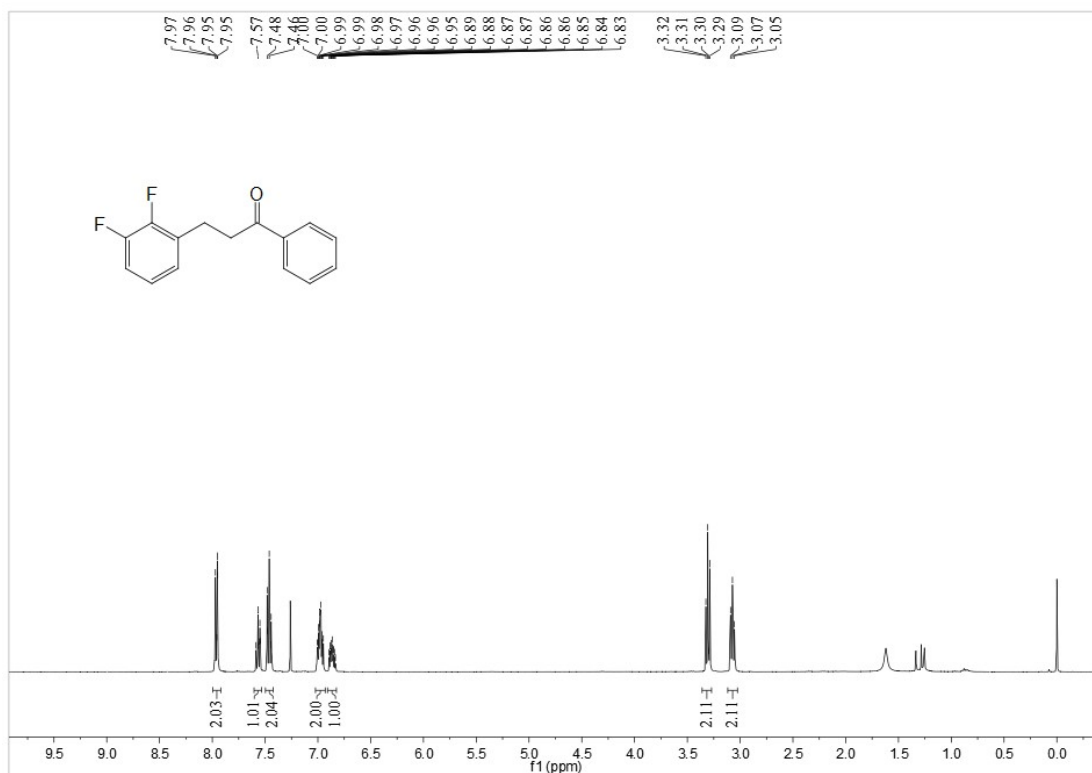

### <sup>13</sup>C NMR for 3-(2,3-difluorophenyl)-1-phenylpropan-1-one (5w)

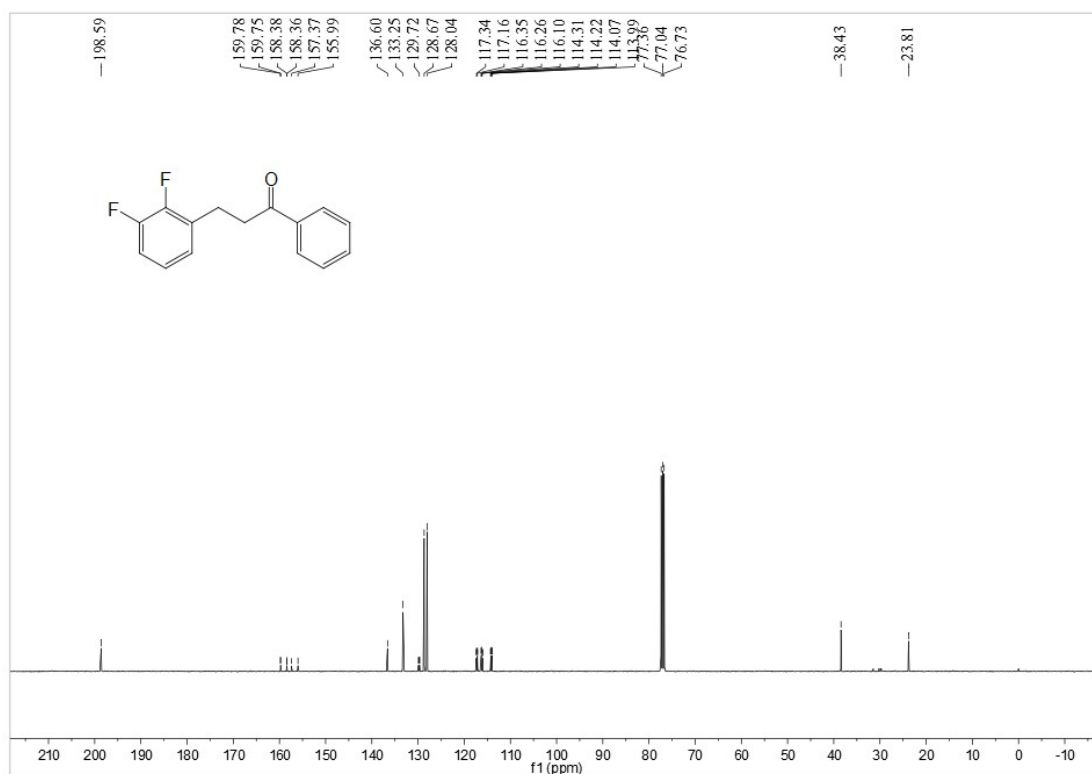



### <sup>1</sup>H NMR for 3-(2-bromophenyl)-1-phenylpropan-1-one (5x)

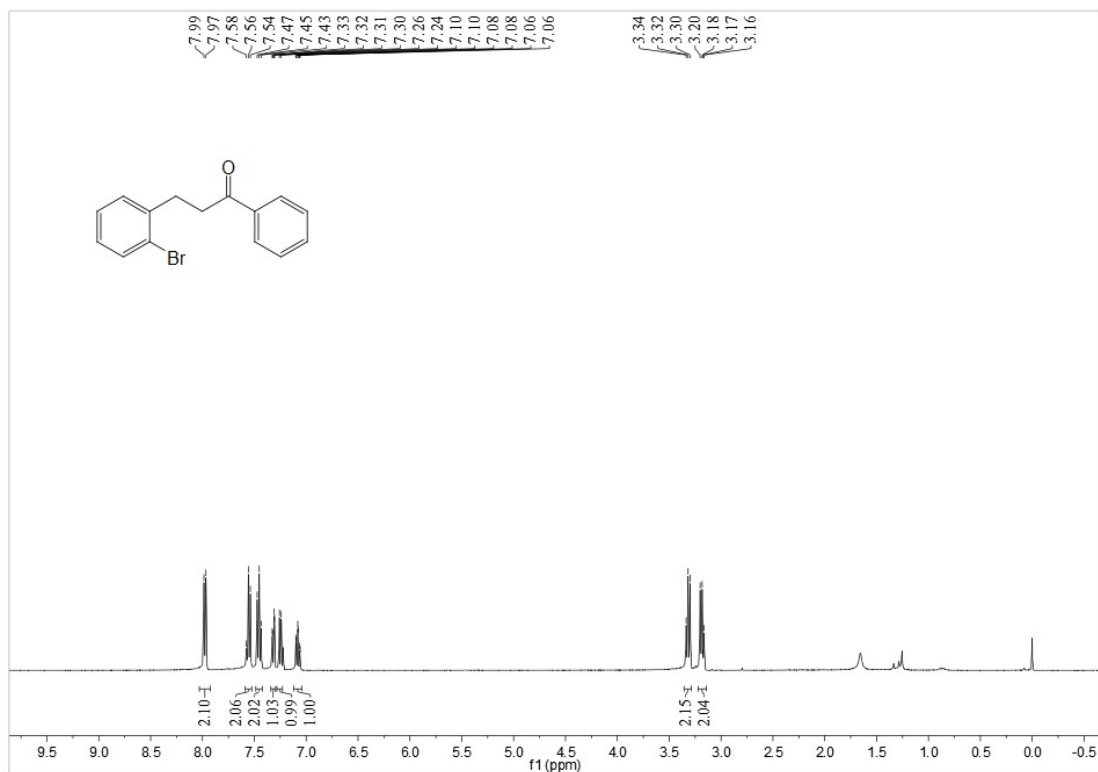

### <sup>13</sup>C NMR for 3-(2-bromophenyl)-1-phenylpropan-1-one (5x)

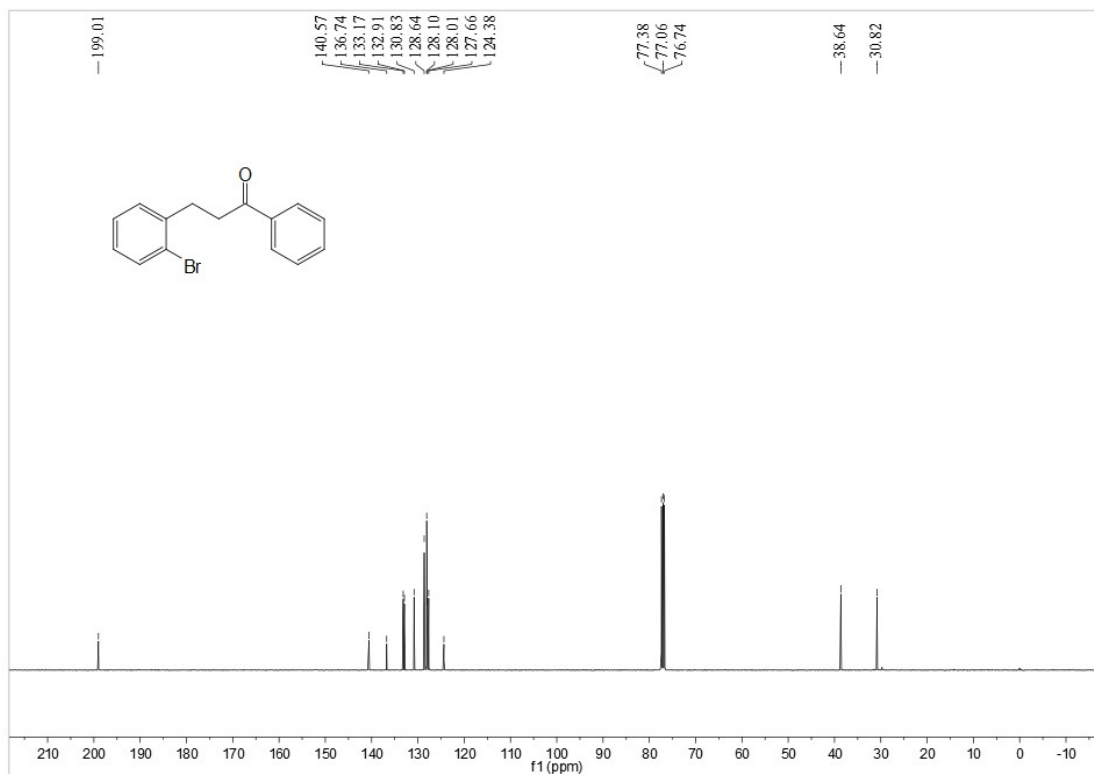

# J. <sup>1</sup>H NMR Spectrum of TC-6-H

--12.42

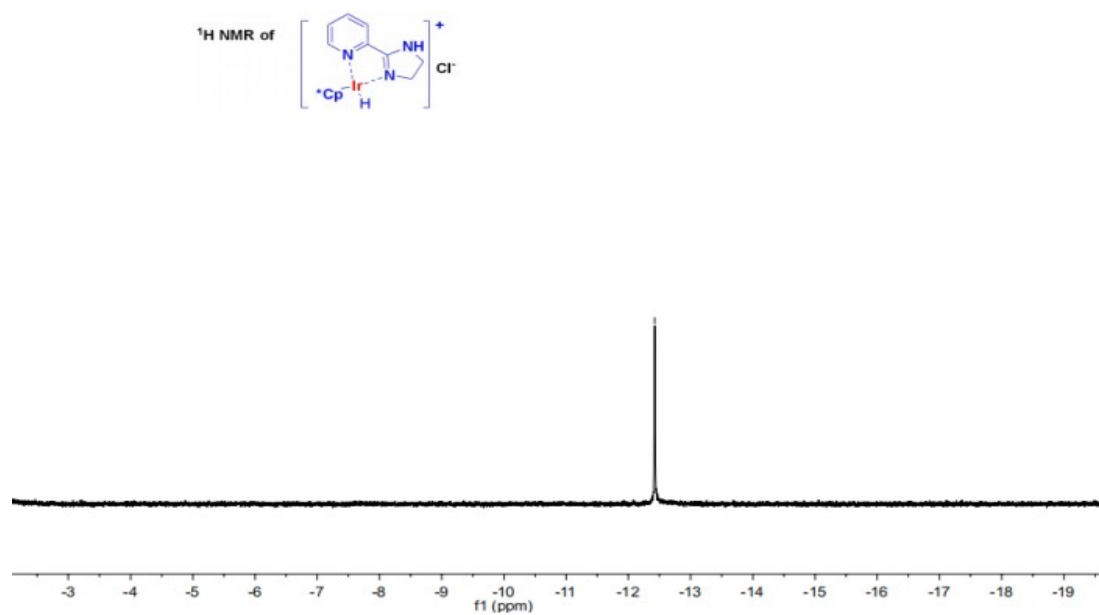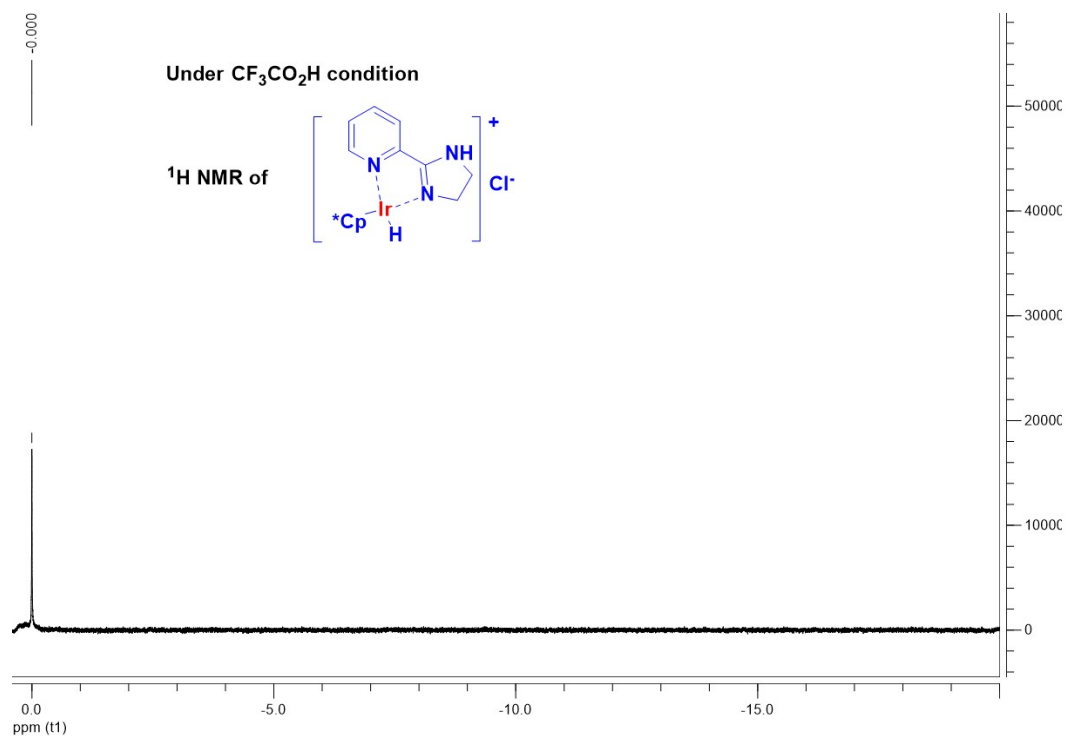

Figure S2. <sup>1</sup>H NMR of TC-6-H
